# Supplementary material for: Lewis acid-switched regiodivergent N 1 / N 2 -alkylation of ben-zotriazoles with α-hydroxyl diazo compounds
Source: Royal Society of Chemistry journal article supplement (doi:10.1039/d5cc07167d), 2026-01-01

## Electronic Supporting Information

### Lewis acid-switched regiodivergent *N*<sup>1</sup>/*N*<sup>2</sup>-alkylation of benzotriazoles with $\alpha$ -hydroxyl diazo compounds

Jingjing Jiang<sup>a</sup>, Jinghan Zhang<sup>a</sup>, Nan Huang<sup>a</sup>, Haochen Xu<sup>b</sup>, Xintao Liu<sup>a</sup>, Jiayin Li<sup>a</sup>, Xinlong Zhou<sup>a</sup>,

Jingjing Zhao<sup>a\*</sup> and Pan Li<sup>a\*</sup>

<sup>a</sup>College of Chemistry and Molecular Sciences, Henan University, Kaifeng 475004, China

<sup>b</sup>School of Advanced Technology, Xi'an Jiaotong-Liverpool University, Suzhou 215000, China

Email: [zhaojingjing@henu.edu.cn](mailto:zhaojingjing@henu.edu.cn);

Email: [panli@henu.edu.cn](mailto:panli@henu.edu.cn)

#### Table of Contents

|                                                                                                    |             |
|----------------------------------------------------------------------------------------------------|-------------|
| General Information.....                                                                           | ESI2        |
| General Procedure for the Synthesis of $\alpha$ -Hydroxyl Diazo Compounds.....                     | ESI2-ESI5   |
| References.....                                                                                    | ESI5        |
| Optimization of Reaction Conditions.....                                                           | ESI6-ESI7   |
| Typical Experimental Procedure and Data of All the Products.....                                   | ESI8-ESI19  |
| Crystallographic Data for Compounds <b>3ga</b> and <b>3oa</b> .....                                | ES20-ESI21  |
| Gram-Scale Synthesis of <b>3aa</b> and <b>4aa</b> .....                                            | ES22        |
| Control Experiments .....                                                                          | ES22-ESI24  |
| Copies of <sup>1</sup> H and <sup>13</sup> C{ <sup>1</sup> H} NMR Spectra of All the Products..... | ESI25-ESI61 |

## General Information:

All reagents purchased from commercial sources were used as received. The silica gel for column chromatography was supplied as 200–300 meshes. The  $^1\text{H}$  and  $^{13}\text{C}$  NMR spectra were recorded on a Bruker AVANCE III (400 Hz) spectrometer and are referenced to the residual solvent signals (7.26 ppm for  $^1\text{H}$  and 77.0 ppm for  $^{13}\text{C}$  in  $\text{CDCl}_3$ ). The HRMS spectra were recorded on a Bruker MicroTOF Q II spectrometer.

## General Procedure for the Synthesis of $\alpha$ -Hydroxyl Diazo Compounds

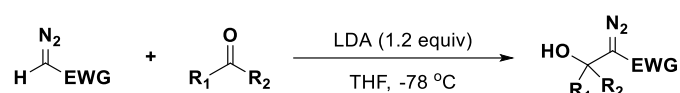

$\alpha$ -Hydroxyl diazo compounds **1a–1q** were prepared by the below mentioned method. <sup>[1]</sup> Diisopropyl aminolithium (12 mmol, 1.2 equiv) was slowly added to a stirred solution of ethyl diazoacetate (10 mmol, 1 equiv) and ketones (10 mmol, 1 equiv) in THF (20 mL) at  $-78\text{ }^\circ\text{C}$  under argon protection and stirred for 12 h. Saturated  $\text{NaHCO}_3$  solution was added to quench the reaction and then this was extracted with EtOAc three times. The organic phase was washed with brine, dried over anhydrous  $\text{MgSO}_4$ , and evaporated to give the crude diazoacetate. The crude diazoacetate was then purified by flash column chromatography (PE/EtOAc = 20/1) to give the  $\alpha$ -hydroxyl diazo compounds.

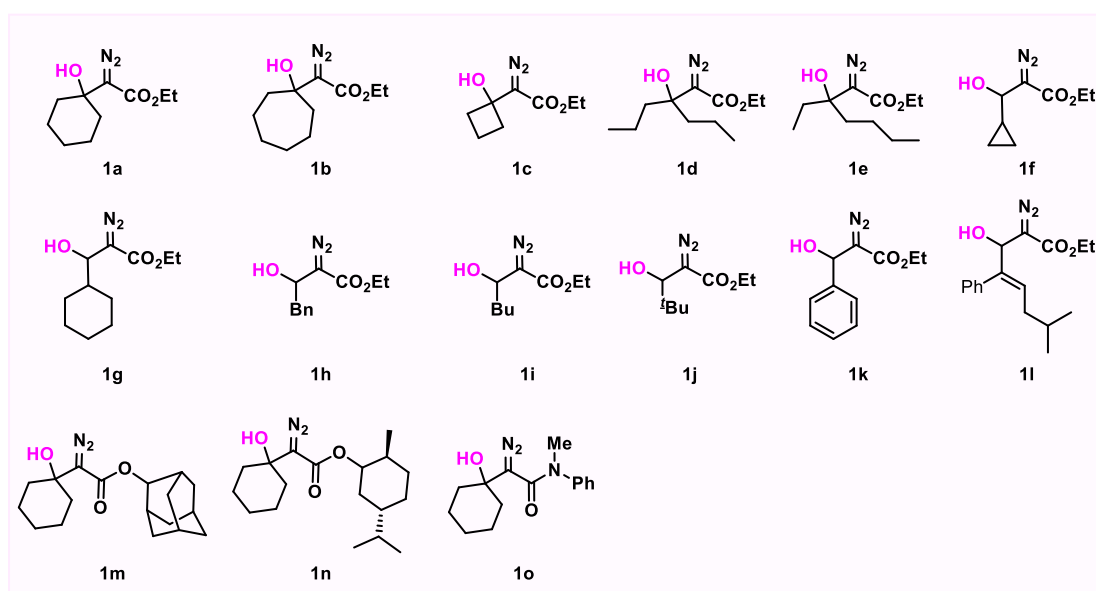

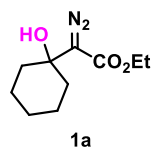

**Ethyl 2-diazo-2-(1-hydroxycyclohexyl)acetate (1a)**, known compound.<sup>[1]</sup> <sup>1</sup>H

NMR (400 MHz, CDCl<sub>3</sub>) δ 4.23 (q, *J* = 7.1 Hz, 2 H), 3.45 (s, 1 H), 1.93 – 1.85 (m, 3 H), 1.76 – 1.67 (m, 4 H), 1.47 – 1.38 (m, 3 H), 1.27 (t, *J* = 7.1 Hz, 3 H).

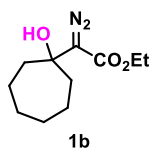

**Ethyl 2-diazo-2-(1-hydroxycycloheptyl)acetate (1b)**, known compound.<sup>[2]</sup> <sup>1</sup>H

NMR (400 MHz, CDCl<sub>3</sub>) δ 4.23 (q, *J* = 7.1 Hz, 2 H), 3.75 (s, 1 H), 2.12 – 1.85 (m, 4 H), 1.74 – 1.45 (m, 8 H), 1.28 (t, *J* = 7.1 Hz, 3 H).

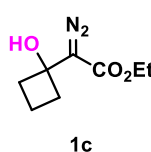

**Ethyl 2-diazo-2-(1-hydroxycyclobutyl)acetate (1c)**, known compound.<sup>[3]</sup> <sup>1</sup>H

NMR (400 MHz, CDCl<sub>3</sub>) δ 4.25 (q, *J* = 7.1 Hz, 2 H), 3.36 (s, 1 H), 2.45 – 2.22 (m, 4 H), 1.99 – 1.89 (m, 1 H), 1.75 – 1.61 (m, 1 H), 1.29 (t, *J* = 7.1 Hz, 3 H).

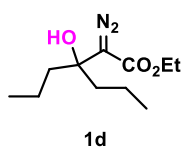

**Ethyl 2-diazo-3-hydroxy-3-propylhexanoate (1d)**, known compound.<sup>[1]</sup> <sup>1</sup>H

NMR (400 MHz, CDCl<sub>3</sub>) δ 4.22 (t, *J* = 7.1 Hz, 2 H), 3.86 (s, 1 H), 1.75 – 1.62 (m, 3 H), 1.47 – 1.34 (m, 5 H), 1.29 (t, *J* = 7.1 Hz, 3 H), 0.93 (t, *J* = 7.3 Hz, 6

H).

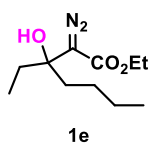

**Ethyl 2-diazo-3-ethyl-3-hydroxyheptanoate (1e)**, new compound. <sup>1</sup>H NMR

(400 MHz, CDCl<sub>3</sub>) δ 4.23 (q, *J* = 7.2 Hz, 2 H), 3.85 (s, 1 H), 1.90 – 1.63 (m, 5 H), 1.41 – 1.16 (m, 6 H), 1.04 – 0.65 (m, 6 H). <sup>13</sup>C{<sup>1</sup>H} NMR (100 MHz, CDCl<sub>3</sub>) δ

167.7, 73.6, 60.8, 38.3, 31.9, 25.8, 22.9, 14.4, 14.0, 8.0. HRMS (ESI) *m/z*: [M + Na]<sup>+</sup> Calcd for C<sub>11</sub>H<sub>20</sub>N<sub>2</sub>NaO<sub>3</sub> 251.1366, found 251.1371.

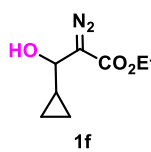

**Ethyl 3-cyclopropyl-2-diazo-3-hydroxypropanoate (1f)**, known compound.<sup>[4]</sup>

<sup>1</sup>H NMR (400 MHz, CDCl<sub>3</sub>) δ 4.26 (q, 2 H), 2.70 (s, 1 H), 1.29 (t, *J* = 7.1 Hz, 3 H), 1.23 – 1.19 (m, 1 H), 1.12 – 0.99 (m, 1 H), 0.71 – 0.49 (m, 3 H), 0.43 – 0.32 (m, 1 H).

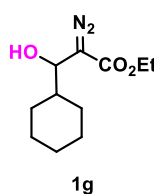

**Ethyl 3-cyclohexyl-2-diazo-3-hydroxypropanoate (1g)**, known compound.<sup>[5]</sup>

<sup>1</sup>H NMR (400 MHz, CDCl<sub>3</sub>) δ 4.31 – 4.27 (m, 1 H), 4.23 (q, *J* = 7.1 Hz, 2 H), 2.50 (s, 1 H), 2.08 – 1.99 (m, 1 H), 1.82 – 1.49 (m, 5 H), 1.28 (t, *J* = 7.1 Hz, 3 H), 1.23 – 0.95 (m, 5 H).

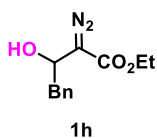

**Ethyl 2-diazo-3-hydroxy-4-phenylbutanoate (1h)**, known compound.<sup>[6]</sup> <sup>1</sup>H NMR (400 MHz, CDCl<sub>3</sub>) δ 7.49 – 7.01 (m, 5 H), 4.99 – 4.83 (m, 1 H), 4.25 (q, *J* = 6.9 Hz, 2 H), 3.17 – 2.96 (m, 2 H), 1.29 (t, *J* = 7.1 Hz, 3 H).

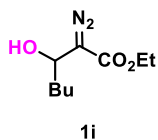

**Ethyl 2-diazo-3-hydroxyheptanoate (1i)**, known compound.<sup>[5]</sup> <sup>1</sup>H NMR (400 MHz, CDCl<sub>3</sub>) δ 4.67 (m, 1 H), 4.24 (q, *J* = 7.1 Hz, 2 H), 2.63 (s, 1 H), 1.79 – 1.66 (m, 1 H), 1.66 – 1.54 (m, 1 H), 1.49 – 1.31 (m, 4 H), 1.28 (t, *J* = 7.1 Hz, 3 H), 0.91 (t, *J* = 7.0 Hz, 3 H).

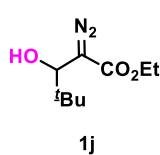

**Ethyl 2-diazo-3-hydroxy-4,4-dimethylpentanoate (1j)**, known compound.<sup>[7]</sup> <sup>1</sup>H NMR (400 MHz, CDCl<sub>3</sub>) δ 4.40 – 3.95 (m, 3 H), 2.75 (s, 1 H), 1.27 (t, *J* = 7.1 Hz, 3 H), 0.97 (s, 9 H).

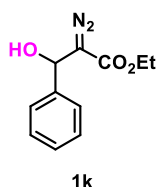

**Ethyl 2-diazo-3-hydroxy-3-phenylpropanoate (1k)**, known compound.<sup>[5]</sup> <sup>1</sup>H NMR (400 MHz, CDCl<sub>3</sub>) δ 7.57 – 7.30 (m, 5 H), 5.91 (m, 1 H), 4.28 (q, *J* = 7.1 Hz, 2 H), 3.06 (s, 1 H), 1.30 (t, *J* = 7.1 Hz, 3 H).

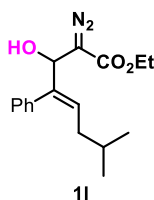

**Ethyl (Z)-2-diazo-3-hydroxy-7-methyl-5-phenyloct-4-enoate (1l)**, new compound. <sup>1</sup>H NMR (400 MHz, CDCl<sub>3</sub>) δ 7.38 – 7.29 (m, 3 H), 7.17 – 7.05 (m, 2 H), 6.09 – 5.94 (m, 1 H), 5.47 (m, 1 H), 4.33 – 4.02 (m, 2 H), 2.00 – 1.82 (m, 2 H), 1.76 – 1.55 (m, 2 H), 1.22 (t, *J* = 7.1 Hz, 3 H), 0.97 – 0.70 (m, 6 H). <sup>13</sup>C{<sup>1</sup>H} NMR (100 MHz, CDCl<sub>3</sub>) δ 166.3, 137.5, 128.9, 128.7, 128.3, 127.4, 70.3, 60.9, 37.3, 28.7, 22.4, 22.2, 14.3. HRMS (ESI) *m/z*: [M + Na]<sup>+</sup> Calcd for C<sub>17</sub>H<sub>22</sub>N<sub>2</sub>NaO<sub>3</sub> 325.1523, found 325.1519.

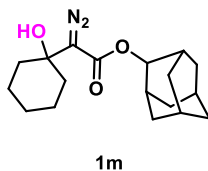

**(1r,5R,7S)-Adamantan-2-yl 2-diazo-2-(1-hydroxycyclohexyl)acetate (1m)**, new compound. <sup>1</sup>H NMR (400 MHz, CDCl<sub>3</sub>) δ 5.13 – 4.87 (m, 1 H), 3.55 (s, 1 H), 2.05 – 1.96 (m, 2 H), 1.95 – 1.68 (m, 16 H), 1.61 – 1.38 (m, 5 H). <sup>13</sup>C{<sup>1</sup>H} NMR (100 MHz, CDCl<sub>3</sub>) δ 166.7, 70.2, 37.3, 36.4, 36.3, 32.0,

31.7, 27.2, 26.9, 25.3, 22.0. HRMS (ESI) *m/z*: [M + H]<sup>+</sup> Calcd for C<sub>18</sub>H<sub>27</sub>N<sub>2</sub>O<sub>3</sub> 319.2016, found 319.2011.

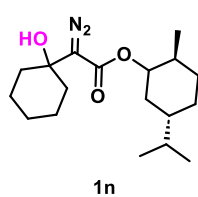

**(2S,5S)-5-isopropyl-2-methylcyclohexyl 2-diazo-2-(1-hydroxycyclohexyl)acetate (1n)**, new compound.  $^1\text{H}$  NMR (400 MHz,  $\text{CDCl}_3$ )  $\delta$  4.92 –

4.49 (m, 1 H), 3.55 (s, 1 H), 1.93 – 1.82 (m, 3 H), 1.77 – 1.58 (m, 7 H), 1.55 – 1.42 (m, 6 H), 1.20 – 0.97 (m, 2 H), 0.96 – 0.82 (m, 6 H), 0.76 (d,  $J$  = 7.0

Hz, 3 H).  $^{13}\text{C}\{^1\text{H}\}$  NMR (100 MHz,  $\text{CDCl}_3$ )  $\delta$  167.0, 74.9, 70.2, 47.1, 41.3, 36.5, 36.4, 34.2, 31.4, 26.5, 25.3, 23.7, 21.99, 21.96, 20.7, 16.5. HRMS (ESI)  $m/z$ :  $[\text{M} + \text{Na}]^+$  Calcd for  $\text{C}_{18}\text{H}_{30}\text{N}_2\text{NaO}_3$  345.2149, found 345.2144.

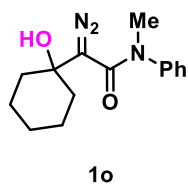

**Diazo-2-(1-hydroxycyclohexyl)-N-methyl-N-phenylacetamide (1o)**, new compound.  $^1\text{H}$  NMR (400 MHz,  $\text{CDCl}_3$ )  $\delta$  7.47 – 7.37 (m, 2 H), 7.33 – 7.27

(m, 1 H), 7.21 – 7.10 (m, 2 H), 5.08 (s, 1 H), 3.33 (s, 3 H), 1.88 – 1.54 (m, 6 H), 1.53 – 1.21 (m, 4 H).  $^{13}\text{C}\{^1\text{H}\}$  NMR (100 MHz,  $\text{CDCl}_3$ )  $\delta$  167.4, 143.4,

130.0, 127.3, 125.9, 77.3, 77.0, 76.7, 71.5, 38.2, 36.4, 25.3, 22.2. HRMS (ESI)  $m/z$ :  $[\text{M} + \text{Na}]^+$  Calcd for  $\text{C}_{16}\text{H}_{20}\text{N}_2\text{NaO}_2$  295.1417, found 295.1419.

## References

- [1] J. Fang, E. Howard and M. Brewer, *Angew. Chem. Int. Ed.*, 2020, **59**, 12827–12831.
- [2] X. Wang, J. Gao, K. Ji and Z. Chen, *Chem. Commun.*, 2020, **56**, 782–785.
- [3] X. Chen, Y. Gao and L. Zhou, *Org. Lett.*, 2025, **27**, 2515–2520.
- [4] M. Peck and M. Brewer, *Org. Lett.*, 2023, **25**, 2647–2651.
- [5] B. Trost, S. Malhotra and P. Koschker, *J. Am. Chem. Soc.*, 2012, **134**, 2075–2084.
- [6] F. Shi, P. Xiao and B. Wang, *J. Org. Chem.*, 2005, **70**, 4318–4322.
- [7] W. Qi, X. Xie, T. Zhong and X. Zhang, *Chin. Chem. Lett.*, 2018, **29**, 194–196.

## Optimization of Reaction Conditions

**Table S1. Solvent Screening<sup>a</sup>**

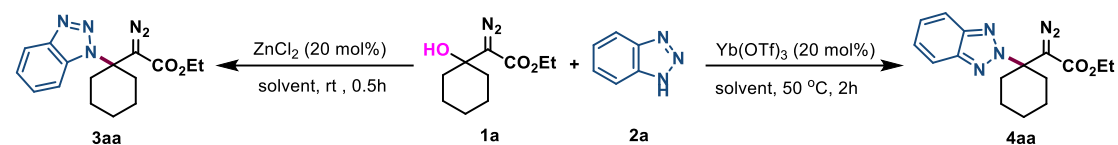

| entry           | solvent     | yield of <b>3aa</b> (%) | yield of <b>4aa</b> (%) |
|-----------------|-------------|-------------------------|-------------------------|
| 1               | <b>THF</b>  | <b>87</b>               | <b>&lt; 5</b>           |
| 2               | 1,4-dioxane | 50                      | < 5                     |
| 3               | DCM         | < 20                    | trace                   |
| 4               | EtOAc       | < 20                    | trace                   |
| 5               | MeCN        | < 20                    | trace                   |
| 6               | MeOH        | < 5                     | trace                   |
| 7               | DCE         | < 5                     | trace                   |
| 8 <sup>b</sup>  | <b>THF</b>  | <b>&lt; 5</b>           | <b>75</b>               |
| 9 <sup>b</sup>  | 1,4-dioxane | < 20                    | 43                      |
| 10 <sup>b</sup> | DCM         | 32                      | < 20                    |
| 11 <sup>b</sup> | EtOAc       | < 20                    | < 20                    |
| 12 <sup>b</sup> | MeCN        | 25                      | < 20                    |
| 13 <sup>b</sup> | MeOH        | < 5                     | N.D.                    |
| 14 <sup>b</sup> | DCE         | 31                      | < 5                     |

<sup>a</sup>Reaction conditions: **1a** (0.3 mmol), **2a** (0.36 mmol),  $\text{ZnCl}_2$  (0.06 mmol), solvent (2 mL), rt, 0.5 h. <sup>b</sup> $\text{Yb}(\text{OTf})_3$  (0.06 mmol), 50 °C. Isolated yield after column chromatography. N.D. indicates "not detected".

**Table S2. Catalyst Screening**

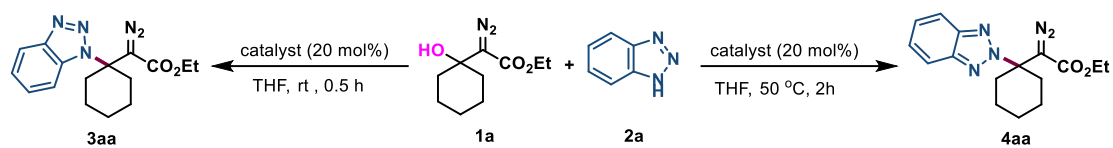

| entry           | Catalyst                   | yield of <b>3aa</b> (%) | yield of <b>4aa</b> (%) |
|-----------------|----------------------------|-------------------------|-------------------------|
| <b>1</b>        | <b>ZnCl<sub>2</sub></b>    | <b>87</b>               | <b>&lt; 5</b>           |
| 2               | ZnBr <sub>2</sub>          | 55                      | < 5                     |
| 3               | ZnI <sub>2</sub>           | < 5                     | 0                       |
| 4               | Zn(OAc) <sub>2</sub>       | < 5                     | 0                       |
| 5               | Zn(OTf) <sub>2</sub>       | < 15                    | 60                      |
| 6               | FeCl <sub>2</sub>          | 12                      | 42                      |
| 7               | CuCl <sub>2</sub>          | 45                      | < 5                     |
| 8               | AgOTf                      | < 5                     | 20                      |
| 9               | Ni(OTf) <sub>2</sub>       | < 5                     | 25                      |
| 10              | Sc(OTf) <sub>3</sub>       | < 5                     | 18                      |
| 11              | Ga(OTf) <sub>3</sub>       | < 5                     | < 10                    |
| 12              | In(OTf) <sub>3</sub>       | < 5                     | 35                      |
| 13              | Y(OTf) <sub>3</sub>        | 20                      | 38                      |
| 14              | Yb(OTf) <sub>2</sub>       | 15                      | 65                      |
| 15              | no ZnCl <sub>2</sub>       | 0                       | 0                       |
| 16 <sup>b</sup> | ZnCl <sub>2</sub>          | < 5                     | 61                      |
| 17 <sup>b</sup> | ZnBr <sub>2</sub>          | < 5                     | 43                      |
| 18 <sup>b</sup> | ZnI <sub>2</sub>           | < 5                     | < 5                     |
| 19 <sup>b</sup> | Zn(OAc) <sub>2</sub>       | < 5                     | < 5                     |
| 20 <sup>b</sup> | Zn(OTf) <sub>2</sub>       | < 5                     | < 5                     |
| 21 <sup>b</sup> | FeCl <sub>2</sub>          | < 5                     | 22                      |
| 22 <sup>b</sup> | CuCl <sub>2</sub>          | 32                      | < 5                     |
| 23 <sup>b</sup> | AgOTf                      | < 5                     | < 5                     |
| 24 <sup>b</sup> | Ni(OTf) <sub>2</sub>       | < 5                     | < 5                     |
| 25 <sup>b</sup> | Sc(OTf) <sub>3</sub>       | < 5                     | < 5                     |
| 26 <sup>b</sup> | Ga(OTf) <sub>3</sub>       | < 5                     | < 5                     |
| 27 <sup>b</sup> | In(OTf) <sub>3</sub>       | < 5                     | < 5                     |
| 28 <sup>b</sup> | Y(OTf) <sub>3</sub>        | 17                      | 56                      |
| 29 <sup>b</sup> | <b>Yb(OTf)<sub>3</sub></b> | <b>&lt; 5</b>           | <b>75</b>               |
| 30 <sup>b</sup> | no Yb(OTf) <sub>3</sub>    | 0                       | 0                       |

<sup>a</sup>Reaction conditions: **1a** (0.3 mmol), **2a** (0.36 mmol), Catalyst (0.06 mmol), THF (2 mL), rt, 0.5 h. <sup>b</sup>50 °C. Isolated yield after column chromatography.

## Typical Experimental Procedure A and Data of Compounds 3

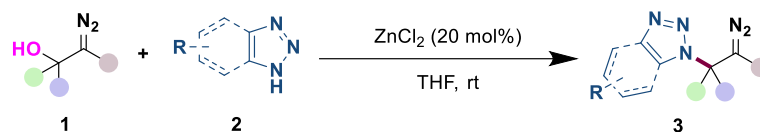

To a 5 mL tube with a stir bar was added  $\alpha$ -hydroxyl diazo compounds **1** (0.3 mmol, 1 equiv), benzotriazole **2** (0.36 mmol, 1.2 equiv) and THF (2 mL), followed by  $\text{ZnCl}_2$  (20 mol%). Then tube was tightly screw capped. The mixture was stirred at room temperature for 0.5 h. The solvents were evaporated in vacuo, and the residue was purified by flash column chromatography (PE/EtOAc = 10/1), affording the desired  $N^1$ -product **3**.

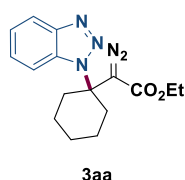

### **Ethyl 2-(1-(1H-benzo[d][1,2,3]triazol-1-yl)cyclohexyl)-2-diazoacetate**

**(3aa)**, new compound: 81.7 mg of **3aa** was obtained from **1a** (63.6 mg, 0.3 mmol) and **2a** (42.8 mg, 0.36 mmol) in 87% yield. Purified by column chromatography (PE/EtOAc = 10/1); slightly yellow solid. mp 54.7 – 56.1 °C.

$^1\text{H}$  NMR (400 MHz,  $\text{CDCl}_3$ )  $\delta$  8.06 (d,  $J$  = 8.3 Hz, 1 H), 7.70 (d,  $J$  = 8.5 Hz, 1 H), 7.50 – 7.39 (m, 1 H), 7.37 – 7.31 (m, 1 H), 4.08 (q,  $J$  = 7.1 Hz, 2 H), 2.83 – 2.59 (m, 4 H), 1.84 – 1.42 (m, 6 H), 1.13 (t,  $J$  = 7.1 Hz, 3 H).  $^{13}\text{C}\{^1\text{H}\}$  NMR (100 MHz,  $\text{CDCl}_3$ )  $\delta$  164.8, 146.6, 131.9, 127.1, 123.6, 120.2, 111.6, 64.1, 60.9, 34.8, 24.8, 22.4, 14.2. HRMS (ESI)  $m/z$ :  $[\text{M} + \text{Na}]^+$  Calcd for  $\text{C}_{16}\text{H}_{19}\text{N}_5\text{NaO}_2$  336.1431, found 336.1430.

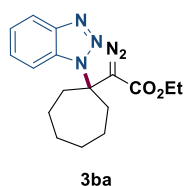

### **Ethyl 2-(1-(1H-benzo[d][1,2,3]triazol-1-yl)cycloheptyl)-2-diazoacetate**

**(3ba)**, new compound: 56.9 mg of **3ba** was obtained from **1b** (67.8 mg, 0.3 mmol) and **2a** (42.8 mg, 0.36 mmol) in 58% yield. Purified by column chromatography (PE/EtOAc = 10/1); slightly yellow oil.  $^1\text{H}$  NMR (400 MHz,

$\text{CDCl}_3$ )  $\delta$  8.06 (d,  $J$  = 8.3 Hz, 1 H), 7.53 (d,  $J$  = 8.4 Hz, 1 H), 7.47 – 7.38 (m, 1 H), 7.33 (t,  $J$  = 7.6 Hz, 1 H), 4.03 (q,  $J$  = 7.1 Hz, 2 H), 3.01 – 2.82 (m, 2 H), 2.75 – 2.54 (m, 2 H), 1.87 – 1.56 (m, 8 H), 1.04 (t,  $J$  = 7.1 Hz, 3 H).  $^{13}\text{C}\{^1\text{H}\}$  NMR (100 MHz,  $\text{CDCl}_3$ )  $\delta$  164.7, 146.7, 131.7, 127.1, 123.6, 120.3, 110.9, 67.4, 61.0 37.8, 29.0, 22.5, 14.1. HRMS (ESI)  $m/z$ :  $[\text{M} + \text{Na}]^+$  Calcd for  $\text{C}_{17}\text{H}_{21}\text{N}_5\text{NaO}_2$  350.1587, found 350.1586.



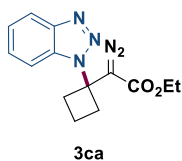

**Ethyl 2-(1-(1H-benzo[d][1,2,3]triazol-1-yl)cyclobutyl)-2-diazoacetate**

**(3ca)**, new compound: 71.0 mg of **3ca** was obtained from **1c** (55.2 mg, 0.3 mmol) and **2a** (42.8 mg, 0.36 mmol) in 83% yield. Purified by column

chromatography (PE/EtOAc = 10/1); slightly yellow oil. <sup>1</sup>H NMR (400 MHz,

CDCl<sub>3</sub>) δ 8.19 – 7.98 (m, 1 H), 7.74 (d, *J* = 8.4 Hz, 1 H), 7.52 – 7.40 (m, 1 H), 7.40 – 7.29 (m, 1 H), 4.15 (q, *J* = 7.1 Hz, 2 H), 3.35 – 3.12 (m, 2 H), 3.10 – 2.92 (m, 2 H), 2.39 – 1.95 (m, 2 H), 1.20 (t, *J* = 7.1 Hz, 3 H). <sup>13</sup>C{<sup>1</sup>H} NMR (100 MHz, CDCl<sub>3</sub>) δ 164.6, 146.2, 131.6, 127.2, 123.8, 119.9, 111.5, 61.0, 60.5, 32.3, 16.3, 14.3. HRMS (ESI) *m/z*: [M + H]<sup>+</sup> Calcd for C<sub>14</sub>H<sub>16</sub>N<sub>5</sub>O<sub>2</sub> 286.1299, found 286.1303.

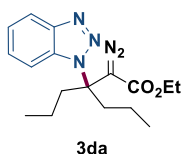

**Ethyl 3-(1-(1H-benzo[d][1,2,3]triazol-1-yl)-2-diazo-3-propylhexanoate (3da),**

new compound: 60.2 mg of **3da** was obtained from **1d** (68.4 mg, 0.3 mmol) and **2a** (42.8 mg, 0.36 mmol) in 61% yield. Purified by column

chromatography (PE/EtOAc = 10/1); slightly yellow oil. <sup>1</sup>H NMR (400 MHz, CDCl<sub>3</sub>) δ 8.06 (d, *J* = 8.3 Hz, 1 H), 7.54 (d, *J* = 8.4 Hz, 1 H), 7.47 – 7.39 (m, 1 H), 7.37 – 7.29 (m, 1 H), 3.99 (d, *J* = 7.1 Hz, 2 H), 2.77 – 2.26 (m, 4 H), 1.47 – 1.32 (m, 2 H), 1.11 – 1.02 (m, 2 H), 0.98 (t, *J* = 7.0 Hz, 3 H), 0.94 – 0.89 (m, 6 H). <sup>13</sup>C{<sup>1</sup>H} NMR (100 MHz, CDCl<sub>3</sub>) δ 164.5, 146.4, 132.0, 127.1, 123.6, 120.3, 110.6, 65.8, 60.9, 36.5, 16.6, 13.94, 13.86. HRMS (ESI) *m/z*: [M + Na]<sup>+</sup> Calcd for C<sub>17</sub>H<sub>23</sub>N<sub>5</sub>NaO<sub>2</sub> 352.1744, found 352.1751.

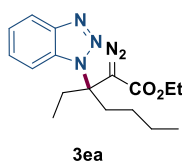

**Ethyl 3-(1-(1H-benzo[d][1,2,3]triazol-1-yl)-2-diazo-3-propylhexanoate (3ea),**

new compound: 75.0 mg of **3ea** was obtained from **1e** (68.4 mg, 0.3 mmol) and **2a** (42.8 mg, 0.36 mmol) in 76% yield. Purified by column

chromatography (PE/EtOAc = 10/1); slightly yellow oil. <sup>1</sup>H NMR (400 MHz,

CDCl<sub>3</sub>) δ 8.07 (d, *J* = 8.2 Hz, 1 H), 7.53 (d, *J* = 8.4 Hz, 1 H), 7.43 (t, *J* = 7.7 Hz, 1 H), 7.34 (t, *J* = 7.6 Hz, 1 H), 3.99 (q, *J* = 7.1 Hz, 2 H), 2.69 – 2.37 (m, 4 H), 1.40 – 1.18 (m, 4 H), 0.98 (t, *J* = 7.0 Hz, 3 H), 0.95 – 0.76 (m, 6 H). <sup>13</sup>C{<sup>1</sup>H} NMR (100 MHz, CDCl<sub>3</sub>) δ 164.6, 146.5, 132.1, 127.1, 123.7, 120.4, 110.7, 66.2, 61.0, 33.3, 27.3, 25.3, 22.5, 14.0, 13.7, 7.7. HRMS (ESI) *m/z*: [M + K]<sup>+</sup> Calcd for C<sub>17</sub>H<sub>23</sub>N<sub>5</sub>KO<sub>2</sub> 368.1483, found 368.1471.

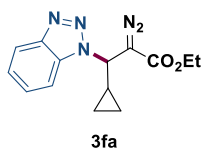

**Ethyl 3-(1H-benzo[d][1,2,3]triazol-1-yl)-3-cyclopropyl-2-diazopropanoate (3fa),**

new compound: 65.8 mg of **3fa** was obtained from **1f** (55.2 mg, 0.3 mmol) and **2a** (42.8 mg, 0.36 mmol) in 77% yield. Purified by column chromatography (PE/EtOAc = 10/1); slightly yellow oil. <sup>1</sup>H NMR (400 MHz, CDCl<sub>3</sub>) δ 8.09 – 7.97 (m, 1 H), 7.58 (d, *J* = 8.4 Hz, 1 H), 7.53 – 7.42 (m, 1 H), 7.41 – 7.31 (m, 1 H), 5.07 (d, *J* = 9.6 Hz, 1 H), 4.25 – 4.01 (m, 2 H), 1.99 – 1.71 (m, 1 H), 1.19 – 1.17 (m, 3 H), 0.92 – 0.75 (m, 1 H), 0.74 – 0.60 (m, 1 H), 0.58 – 0.46 (m, 2 H). <sup>13</sup>C{<sup>1</sup>H} NMR (100 MHz, CDCl<sub>3</sub>) δ 165.1, 145.4, 132.4, 127.4, 123.8, 119.7, 109.4, 61.2, 58.4, 14.1, 13.7, 4.9, 3.9. HRMS (ESI) *m/z*: [M + Na]<sup>+</sup> Calcd for C<sub>14</sub>H<sub>15</sub>N<sub>5</sub>NaO<sub>2</sub> 308.1118, found 308.1107.

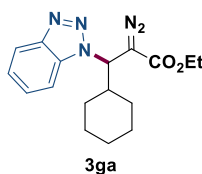

**Ethyl 3-(1H-benzo[d][1,2,3]triazol-1-yl)-3-cyclohexyl-2-diazopropanoate (3ga),**

new compound: 92.2 mg of **3ga** was obtained from **1g** (67.8 mg, 0.3 mmol) and **2a** (42.8 mg, 0.36 mmol) in 94% yield. Purified by column chromatography (PE/EtOAc = 10/1); slightly yellow solid. mp 70.2 – 72.6 °C. <sup>1</sup>H NMR (400 MHz, CDCl<sub>3</sub>) δ 8.06 (d, *J* = 8.4 Hz, 1 H), 7.63 (d, *J* = 8.4 Hz, 1 H), 7.56 – 7.45 (m, 1 H), 7.42 – 7.32 (m, 1 H), 5.35 (d, *J* = 11.2 Hz, 1 H), 4.22 – 4.13 (m, 2 H), 2.51 – 2.32 (m, 1 H), 2.12 – 1.95 (m, 1 H), 1.91 – 1.81 (m, 1 H), 1.76 – 1.61 (m, 1 H), 1.64 – 1.53 (m, 1 H), 1.40 – 1.11 (m, 7 H), 1.06 – 1.02 (m, 1 H), 0.97 – 0.80 (m, 1 H). <sup>13</sup>C{<sup>1</sup>H} NMR (100 MHz, CDCl<sub>3</sub>) δ 165.8, 145.3, 133.4, 127.6, 124.0, 119.9, 109.6, 61.4, 59.0, 39.8, 30.3, 29.7, 25.9, 25.6, 25.1, 14.3. HRMS (ESI) *m/z*: [M + Na]<sup>+</sup> Calcd for C<sub>17</sub>H<sub>21</sub>N<sub>5</sub>NaO<sub>2</sub> 350.1587, found 350.1582.

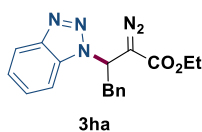

**Ethyl 3-(1H-benzo[d][1,2,3]triazol-1-yl)-2-diazo-4-phenylbutanoate (3ha),**

new compound: 79.4 mg of **3ha** was obtained from **1h** (70.2 mg, 0.3 mmol) and **2a** (42.8 mg, 0.36 mmol) in 79% yield. Purified by column chromatography (PE/EtOAc = 10/1); slightly yellow oil. <sup>1</sup>H NMR (400 MHz, CDCl<sub>3</sub>) δ 8.01 (d, *J* = 8.3 Hz, 1 H), 7.45 – 7.36 (m, 1 H), 7.34 – 7.28 (m, 1 H), 7.22 – 7.13 (m, 2 H), 7.12 – 7.07 (m, 2 H), 6.00 – 5.81 (m, 1 H), 4.23 – 4.05 (m, 2 H), 3.79 – 3.49 (m, 2 H), 1.58 (s, 2 H), 1.19 (t, *J* = 7.1 Hz, 3 H). <sup>13</sup>C{<sup>1</sup>H} NMR (100 MHz, CDCl<sub>3</sub>) δ 165.3, 145.4, 135.3, 132.9, 128.74, 128.67, 127.5, 127.4, 124.0, 119.7, 109.4, 61.5, 55.1, 38.8, 14.3. HRMS (ESI) *m/z*: [M + Na]<sup>+</sup> Calcd for C<sub>18</sub>H<sub>17</sub>N<sub>5</sub>NaO<sub>2</sub> 358.1274, found 358.1266.

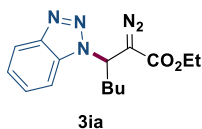

**2-(1H-benzo[d][1,2,3]triazol-1-yl)-1-diazo-2-methylpropanoate (3ia)**, new compound: 75.9 mg of **3ia** was obtained from **1i** (60.0 mg, 0.3 mmol) and

**2a** (42.8 mg, 0.36 mmol) in 84% yield. Purified by column chromatography

(PE/EtOAc = 10/1); slightly yellow oil.  $^1\text{H}$  NMR (400 MHz,  $\text{CDCl}_3$ )  $\delta$  8.11 – 7.96 (m, 1 H), 7.66 (d,  $J$  = 8.4 Hz, 1 H), 7.52 – 7.43 (m, 1 H), 7.41 – 7.30 (m, 1 H), 5.77 – 5.60 (m, 1 H), 4.28 – 4.09 (m, 2 H), 2.53 – 2.35 (m, 1 H), 2.34 – 2.20 (m, 1 H), 1.46 – 1.28 (m, 3 H), 1.21 (t,  $J$  = 7.1 Hz, 4 H), 0.87 (t,  $J$  = 7.1 Hz, 3 H).  $^{13}\text{C}\{^1\text{H}\}$  NMR (100 MHz,  $\text{CDCl}_3$ )  $\delta$  165.4, 145.6, 132.8, 127.5, 124.0, 119.9, 109.7, 61.3, 53.8, 32.0, 28.1, 21.9, 14.3, 13.7. HRMS (ESI)  $m/z$ :  $[\text{M} + \text{H}]^+$  Calcd for  $\text{C}_{15}\text{H}_{20}\text{N}_5\text{O}_2$  302.1612, found 302.1620.

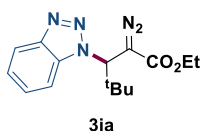

**Ethyl 3-(1H-benzo[d][1,2,3]triazol-1-yl)-2-diazo-4,4-dimethylpentanoate (3ja)**, new compound: 81.3 mg of **3ja** was obtained from **1j** (60.0 mg, 0.3 mmol) and **2a** (42.8 mg, 0.36 mmol) in 90% yield. Purified by column

chromatography (PE/EtOAc = 10/1); slightly yellow solid. mp 45.1 – 47.4 °C.  $^1\text{H}$  NMR (400 MHz,

$\text{CDCl}_3$ )  $\delta$  8.06 (d,  $J$  = 8.4 Hz, 1 H), 7.59 (d,  $J$  = 8.5 Hz, 1 H), 7.49 (t,  $J$  = 7.6 Hz, 1 H), 7.36 (t,  $J$  = 7.6 Hz, 1 H), 5.41 (s, 1 H), 4.26 – 4.11 (m, 2 H), 1.22 (t,  $J$  = 7.1 Hz, 3 H), 1.12 (s, 9 H).  $^{13}\text{C}\{^1\text{H}\}$  NMR (100 MHz,  $\text{CDCl}_3$ )  $\delta$  166.3, 144.7, 133.9, 127.6, 124.0, 119.8, 109.6, 61.4, 61.0, 39.1, 27.2, 14.3. HRMS (ESI)  $m/z$ :  $[\text{M} + \text{Na}]^+$  Calcd for  $\text{C}_{15}\text{H}_{19}\text{N}_5\text{NaO}_2$  324.1431, found 324.1425.

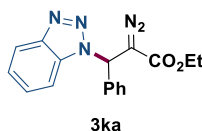

**Ethyl (R)-3-(1H-benzo[d][1,2,3]triazol-1-yl)-2-diazo-3-phenylpropanoate (3ka)**, new compound: 65.5 mg of **3ka** was obtained from **1k** (60.0 mg, 0.3 mmol) and **2a** (42.8 mg, 0.36 mmol) in 68% yield. Purified by column

chromatography (PE/EtOAc = 10/1); slightly yellow solid. mp 105.4 – 106.7 °C.  $^1\text{H}$  NMR (400

MHz,  $\text{CDCl}_3$ )  $\delta$  8.10 (d,  $J$  = 8.3 Hz, 1 H), 7.47 – 7.30 (m, 6 H), 7.16 – 7.11 (m, 2 H), 6.98 (s, 1 H), 4.23 (q,  $J$  = 7.1 Hz, 2 H), 1.26 (t,  $J$  = 7.9 Hz, 3 H).  $^{13}\text{C}\{^1\text{H}\}$  NMR (100 MHz,  $\text{CDCl}_3$ )  $\delta$  165.1, 146.1, 135.0, 132.7, 129.3, 129.0, 127.7, 126.3, 124.2, 120.1, 109.5, 61.6, 58.1, 14.3. HRMS (ESI)  $m/z$ :  $[\text{M} + \text{Na}]^+$  Calcd for  $\text{C}_{17}\text{H}_{15}\text{N}_5\text{NaO}_2$  344.1118, found 344.1114.

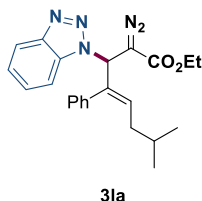

**Ethyl (E)-3-(1H-benzo[d][1,2,3]triazol-1-yl)-2-diazo-7-methyl-4-phenyl**

**oct-4-enoate (3la)**, new compound: 82.2 mg of **3la** was obtained from **1l**

(90.6 mg, 0.3 mmol) and **2a** (42.8 mg, 0.36 mmol) in 68% yield. Purified by

column chromatography (PE/EtOAc = 10/1); slightly yellow oil. <sup>1</sup>H NMR

(400 MHz, CDCl<sub>3</sub>) δ 8.02 (d, *J* = 8.3 Hz, 1 H), 7.50 (d, *J* = 8.3 Hz, 1 H), 7.46 – 7.37 (m, 1 H), 7.37 – 7.29 (m, 1 H), 7.22 – 7.07 (m, 3 H), 6.72 (d, *J* = 7.2 Hz, 2 H), 6.21 (s, 1 H), 5.82 – 5.59 (m, 1 H), 4.31 – 4.14 (m, 2 H), 2.60 – 2.36 (m, 1 H), 2.21 – 1.98 (m, 1 H), 1.53 – 1.33 (m, 1 H), 1.31 – 1.19 (m, 3 H), 0.99 – 0.84 (m, 6 H). <sup>13</sup>C{<sup>1</sup>H} NMR (100 MHz, CDCl<sub>3</sub>) δ 165.6, 146.0, 135.2, 133.0, 132.5, 128.9, 128.2, 128.0, 126.9, 123.6, 119.9, 113.2, 109.9, 64.1, 61.2, 40.4, 24.6, 22.7, 21.7, 14.2. HRMS (ESI) *m/z*: [M + Na]<sup>+</sup> Calcd for C<sub>23</sub>H<sub>25</sub>N<sub>5</sub>NaO<sub>2</sub> 426.1900, found 426.1897.

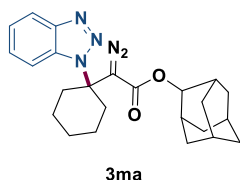

**(1r,5R,7S)-Adamantan-2-yl 2-(1-(1H-benzo[d][1,2,3]triazol-1-yl)**

**cyclohexyl)-2-diazo acetate (3ma)**, new compound: 90.5 mg of **3ma**

was obtained from **1m** (95.4 mg, 0.3 mmol) and **2a** (42.8 mg, 0.36 mmol)

in 72% yield. Purified by column chromatography (PE/EtOAc = 10/1);

slightly yellow solid. mp 98.3 – 98.6 °C. <sup>1</sup>H NMR (400 MHz, CDCl<sub>3</sub>) δ 8.04 (d, *J* = 8.3 Hz, 1 H),

7.65 (d, *J* = 8.4 Hz, 1 H), 7.43 (t, *J* = 7.6 Hz, 1 H), 7.33 (t, *J* = 7.6 Hz, 1 H), 5.02 – 4.66 (m, 1

H), 3.16 – 2.46 (m, 4 H), 2.11 – 1.32 (m, 20 H). <sup>13</sup>C{<sup>1</sup>H} NMR (100 MHz, CDCl<sub>3</sub>) δ 164.3, 146.6,

131.9, 127.1, 123.6, 120.2, 111.3, 78.0, 64.0, 37.2, 36.1, 34.9, 31.8, 31.5, 26.9, 26.8, 24.9, 22.5.

HRMS (ESI) *m/z*: [M + Na]<sup>+</sup> Calcd for C<sub>24</sub>H<sub>29</sub>N<sub>5</sub>NaO<sub>2</sub> 442.2213, found 442.2218.

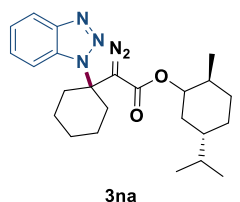

**(2S,5S)-5-Isopropyl-2-methylcyclohexyl 2-(1-(1H-benzo[d][1,2,3]tri**

**azol-1-yl)cyclohexyl)-2-diazoacetate (3na)**, new compound: 88.8 mg of

**3na** was obtained from **1n** (96.6 mg, 0.3 mmol) and **2a** (42.8 mg, 0.36

mmol) in 70% yield. Purified by column chromatography (PE/EtOAc =

10/1); slightly yellow solid. mp 87.5 – 88.9 °C. <sup>1</sup>H NMR (400 MHz, CDCl<sub>3</sub>) δ 8.03 (d, *J* = 8.3 Hz,

1 H), 7.60 (d, *J* = 8.4 Hz, 1 H), 7.53 – 7.38 (m, 1 H), 7.36 – 7.23 (m, 1 H), 4.75 – 4.45 (m, 1 H),

2.74 – 2.54 (m, 4 H), 1.89 – 1.45 (m, 8 H), 1.39 – 1.07 (m, 4 H), 0.97 – 0.72 (m, 6 H), 0.67 (d,

*J* = 7.0 Hz, 3 H), 0.48 (d, *J* = 6.9 Hz, 3 H). <sup>13</sup>C{<sup>1</sup>H} NMR (100 MHz, CDCl<sub>3</sub>) δ 164.5, 146.5,

131.8, 127.0, 123.5, 120.2, 111.1, 75.0, 63.7, 46.8, 40.8, 35.0, 34.9, 33.9, 31.2, 26.0, 24.8, 23.2,

22.4, 21.8, 20.5, 15.9. HRMS (ESI)  $m/z$ :  $[M + Na]^+$  Calcd for  $C_{24}H_{33}N_5NaO_2$  446.2526, found 446.2531.

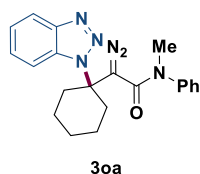

***E*-(1-(1H-benzo[d][1,2,3]triazol-1-yl)cyclohexyl)-2-diazo-N-methyl-N-phenylacetamide (3oa)**, new compound: 67.3 mg of **3oa** was obtained from **1o** (81.9 mg, 0.3 mmol) and **2a** (42.8 mg, 0.36 mmol) in 60% yield.

Purified by column chromatography (PE/EtOAc = 10/1); slightly yellow solid. mp 75.4 – 76.1 °C.  $^1H$  NMR (400 MHz,  $CDCl_3$ )  $\delta$  8.05 (d,  $J$  = 8.3 Hz, 1 H), 7.80 (d,  $J$  = 8.5 Hz, 1 H), 7.55 – 7.20 (m, 5 H), 7.15 – 6.97 (m, 2 H), 3.20 (s, 3 H),  $\delta$  2.76 – 2.56 (m, 4H), 1.90 – 1.45 (m, 6 H).  $^{13}C\{^1H\}$  NMR (100 MHz,  $CDCl_3$ )  $\delta$  164.2, 146.4, 143.8, 132.3, 130.0, 127.2, 127.0, 125.8, 123.4, 120.1, 112.3, 65.4, 62.7, 38.6, 34.7, 24.9, 22.5. HRMS (ESI)  $m/z$ :  $[M + Na]^+$  Calcd for  $C_{21}H_{22}N_6NaO$  397.1747, found 397.1736.

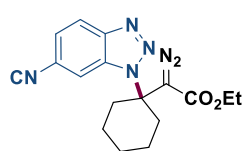

***Ethyl 2-(1-(7-cyano-1H-benzo[d][1,2,3]triazol-1-yl)cyclohexyl)-2-diazoacetate (3ab)***, new compound: 87.2 mg of **3ab** was obtained from **1a** (63.6 mg, 0.3 mmol) and **2b** (51.8 mg, 0.36 mmol) in 86% yield.

Purified by column chromatography (PE/EtOAc = 10/1); slightly yellow solid. mp 67.8 – 68.5 °C. Major isomer:  $^1H$  NMR (400 MHz,  $CDCl_3$ )  $\delta$  8.37 (m, 2 H), 8.14 – 8.06 (m, 2 H), 7.81 (d,  $J$  = 8.8 Hz, 2 H), 7.60 (d,  $J$  = 8.7 Hz, 2 H), 7.51 (d,  $J$  = 8.6 Hz, 1 H), 4.02 (q,  $J$  = 7.5 Hz, 6 H), 2.83 – 2.51 (m, 13 H), 1.80 – 1.38 (m, 20 H), 1.19 – 1.01 (m, 10 H).  $^{13}C\{^1H\}$  NMR (100 MHz,  $CDCl_3$ )  $\delta$  164.4, 145.6, 133.7, 129.2, 126.0, 117.8, 113.3, 107.3, 65.1, 61.0, 34.7, 24.6, 22.3, 14.1. HRMS (ESI)  $m/z$ :  $[M + Na]^+$  Calcd for  $C_{17}H_{18}N_6NaO_2$  361.1383, found 361.1384.

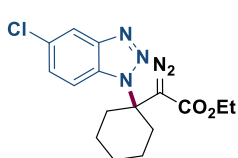

***Ethyl 2-(1-(5-chloro-1H-benzo[d][1,2,3]triazol-1-yl)cyclohexyl)-2-diazoacetate (3ac)***, new compound: 81.2 mg of **3ac** was obtained from **1a** (63.6 mg, 0.3 mmol) and **2c** (55.3 mg, 0.36 mmol) in 78% yield.

Purified by column chromatography (PE/EtOAc = 10/1); slightly yellow oil.  $^1H$  NMR (400 MHz,  $CDCl_3$ )  $\delta$  8.07 – 7.93 (m, 1 H), 7.74 – 7.63 (m, 1 H), 7.46 – 7.28 (m, 1 H), 4.10 (q,  $J$  = 7.2 Hz, 2 H), 2.91 – 2.54 (m, 4 H), 1.87 – 1.40 (m, 6 H), 1.15 (t,  $J$  = 7.3 Hz, 3 H).  $^{13}C\{^1H\}$  NMR (100 MHz,  $CDCl_3$ )  $\delta$  164.6, 147.2, 145.0, 133.5, 132.4, 130.7, 129.4, 128.0, 124.8,

121.0, 119.4, 112.6, 111.5, 64.5, 64.5, 62.9, 61.0, 60.9, 34.7, 24.7, 22.5, 22.4, 22.3, 14.1.

HRMS (ESI)  $m/z$ :  $[M + Na]^+$  Calcd for  $C_{16}H_{18}ClN_5NaO_2$  370.1041, found 370.1033.

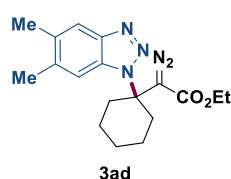

**Ethyl 2-diazo-2-(1-(5,6-dimethyl-1H-benzo[d][1,2,3]triazol-1-yl)cyclohexyl)acetate (3ad)**, new compound: 79.8 mg of **3ad** was obtained from **1a** (63.6 mg, 0.3 mmol) and **2d** (52.3 mg, 0.36 mmol) in 78% yield.

Purified by column chromatography (PE/EtOAc = 10/1); slightly yellow solid. mp 89.7 – 91.0 °C.  $^1H$  NMR (400 MHz,  $CDCl_3$ )  $\delta$  7.78 (s, 1 H), 7.42 (s, 1 H), 4.09 (q,  $J$  = 7.1 Hz, 2 H), 2.98 – 2.49 (m, 4 H), 2.41 (s, 3 H), 2.37 (s, 3 H), 1.82 – 1.41 (m, 6 H), 1.14 (t,  $J$  = 7.1 Hz, 3 H).  $^{13}C\{^1H\}$  NMR (100 MHz,  $CDCl_3$ )  $\delta$  164.8, 145.8, 137.2, 133.3, 130.9, 119.2, 111.0, 63.7, 60.8, 34.7, 24.8, 22.4, 21.1, 20.2, 14.2. HRMS (ESI)  $m/z$ :  $[M + Na]^+$  Calcd for  $C_{18}H_{23}N_5NaO_2$  364.1744, found 364.1746.

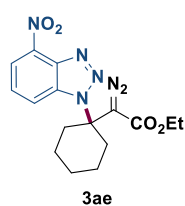

**Ethyl 2-diazo-2-(1-(7-nitro-1H-benzo[d][1,2,3]triazol-1-yl)cyclohexyl)acetate (3ae)**, new compound: 93.4 mg of **3ae** was obtained from **1a** (63.6 mg, 0.3 mmol) and **2e** (59.0 mg, 0.36 mmol) in 87% yield. Purified by column chromatography (PE/EtOAc = 10/1); slightly yellow solid. mp 67.9 – 68.4 °C.

$^1H$  NMR (400 MHz,  $CDCl_3$ )  $\delta$  8.41 – 8.32 (m, 1 H), 8.30 – 8.17 (m, 1 H), 7.63 – 7.38 (m, 1 H), 4.15 (q,  $J$  = 7.1 Hz, 2 H), 2.90 – 2.50 (m, 4 H), 2.00 – 1.66 (m, 3 H), 1.65 – 1.41 (m, 3 H), 1.23 (t,  $J$  = 7.1 Hz, 3 H).  $^{13}C\{^1H\}$  NMR (100 MHz,  $CDCl_3$ )  $\delta$  164.7, 145.9, 138.2, 136.9, 126.4, 124.6, 124.2, 70.7, 60.9, 35.2, 24.7, 22.8, 14.3. HRMS (ESI)  $m/z$ :  $[M + Na]^+$  Calcd for  $C_{16}H_{18}N_6NaO_4$  381.1282, found 381.1271.

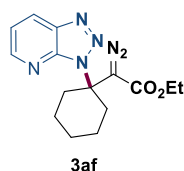

**Ethyl 2-(1-(3H-[1,2,3]triazolo[4,5-b]pyridin-3-yl)cyclohexyl)-2-diazoacetate (3af)**, new compound: 66.9 mg of **3af** was obtained from **1a** (63.6 mg, 0.3 mmol) and **2f** (43.2 mg, 0.36 mmol) in 71% yield. Purified by column chromatography (PE/EtOAc = 10/1); slightly yellow solid. mp 68.2 – 69.6 °C.

**Major isomer:**  $^1H$  NMR (400 MHz,  $CDCl_3$ )  $\delta$  8.76 – 8.45 (m, 1 H), 8.45 – 8.22 (m, 1 H), 7.39 – 7.30 (m, 1 H), 4.05 (q,  $J$  = 7.1 Hz, 2 H), 3.14 – 2.38 (m, 4 H), 1.94 – 1.37 (m, 6 H), 1.12 (t,  $J$  = 7.1 Hz, 3 H).  $^{13}C\{^1H\}$  NMR (100 MHz,  $CDCl_3$ )  $\delta$  165.0, 149.3, 145.8, 137.6, 128.4, 119.4, 64.4, 60.6, 34.1, 24.9, 22.5, 14.1. **Minor isomer:**  $^1H$  NMR (400 MHz,  $CDCl_3$ )  $\delta$  8.84 – 8.66 (m, 1 H),

8.29 – 8.05 (m, 1 H), 7.37 – 7.28 (m, 1 H), 4.18 – 4.05 (m, 2 H), 2.79 – 2.48 (m, 4 H), 1.93 – 1.67 (m, 2 H), 1.65 – 1.35 (m, 3 H), 1.19 (t,  $J = 7.1$ , 3 H).  $^{13}\text{C}\{^1\text{H}\}$  NMR (100 MHz,  $\text{CDCl}_3$ )  $\delta$  164.5, 155.2, 151.6, 135.8, 127.3, 121.8, 70.0, 60.6, 34.9, 24.7, 22.7, 14.1. HRMS (ESI)  $m/z$ :  $[\text{M} + \text{Na}]^+$  Calcd for  $\text{C}_{15}\text{H}_{18}\text{N}_6\text{NaO}_2$  337.1383, found 337.1379.

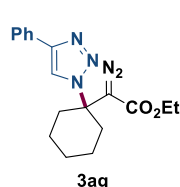

**Ethyl 2-diazo-2-(1-(4-phenyl-1H-1,2,3-triazol-1-yl)cyclohexyl)acetate**

**(3ag)**, new compound: 83.4 mg of **3ag** was obtained from **1a** (63.6 mg, 0.3 mmol) and **2g** (52.2 mg, 0.36 mmol) in 82% yield. Purified by column chromatography (PE/EtOAc = 10/1); slightly yellow oil.  $^1\text{H}$  NMR (400 MHz,  $\text{CDCl}_3$ )  $\delta$  8.02 (s, 1 H), 7.96 – 7.79 (m, 2 H), 7.41 (t,  $J = 7.7$  Hz, 2 H), 7.36 – 7.31 (m, 1 H), 4.15 (q,  $J = 7.1$  Hz, 2 H), 2.85 – 2.59 (m, 2 H), 2.51 – 2.31 (m, 2 H), 1.90 – 1.38 (m, 6 H), 1.23 (t,  $J = 7.1$  Hz, 3 H).  $^{13}\text{C}\{^1\text{H}\}$  NMR (100 MHz,  $\text{CDCl}_3$ )  $\delta$  164.7, 146.8, 130.7, 128.7, 127.9, 125.6, 118.2, 62.5, 60.8, 34.6, 24.7, 22.2, 14.2. HRMS (ESI)  $m/z$ :  $[\text{M} + \text{Na}]^+$  Calcd for  $\text{C}_{18}\text{H}_{21}\text{N}_5\text{NaO}_2$  362.1587, found 362.1584.

**Typical Experimental Procedure B and Data of Compounds 4**

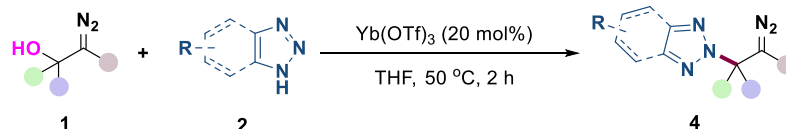

To a 5 mL tube with a stir bar was added  $\alpha$ -hydroxyl diazo compounds **1** (0.3 mmol, 1 equiv), benzotriazole **2** (0.36 mmol, 1.2 equiv) and THF (2 mL), followed by  $\text{Yb}(\text{OTf})_3$  (20 mol%). Then tube was tightly screw capped. The mixture was stirred at 50 °C for 2 h. The solvents were evaporated in vacuo, and the residue was purified by flash column chromatography (PE/EtOAc = 20/1), affording the desired  $\text{N}^2$ -product **4**.

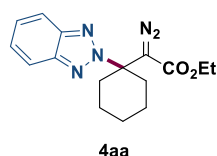

**Ethyl 2-(1-(2H-benzo[d][1,2,3]triazol-2-yl)cyclohexyl)-2-diazoacetate**

**(4aa)**, new compound: 70.4 mg of **4aa** was obtained from **1a** (63.6 mg, 0.3 mmol) and **2a** (42.8 mg, 0.36 mmol) in 75% yield. Purified by column chromatography (PE/EtOAc = 20/1); slightly yellow oil.  $^1\text{H}$  NMR (400 MHz,  $\text{CDCl}_3$ )  $\delta$  7.90 – 7.82 (m, 2 H), 7.40 – 7.31 (m, 2 H), 4.14 (q,  $J = 7.1$  Hz, 2 H), 2.80 – 2.48 (m, 4 H), 1.85 – 1.40 (m, 6 H), 1.20 (t,  $J = 7.1$  Hz, 3 H).  $^{13}\text{C}\{^1\text{H}\}$  NMR (100 MHz,  $\text{CDCl}_3$ )  $\delta$  164.8,

143.8, 126.1, 118.3, 68.8, 60.7, 35.1, 24.8, 22.8, 14.3. HRMS (ESI)  $m/z$ :  $[M + Na]^+$  Calcd for  $C_{16}H_{19}N_5NaO_2$  336.1431, found 336.1430.

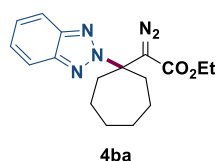

**Ethyl 2-(1-(2H-benzo[d][1,2,3]triazol-2-yl)cycloheptyl)-2-diazoacetate**

**(4ba)**, new compound: 69.7 mg of **4ba** was obtained from **1b** (67.8 mg, 0.3 mmol) and **2a** (42.8 mg, 0.36 mmol) in 71% yield. Purified by column

chromatography (PE/EtOAc = 20/1); slightly yellow oil.  $^1H$  NMR (400 MHz,  $CDCl_3$ )  $\delta$  7.82 – 7.67 (m, 2 H), 7.29 – 7.18 (m, 2 H), 4.03 (q,  $J$  = 7.1 Hz, 2 H), 2.73 – 2.60 (m, 2 H), 2.56 – 2.35 (m, 2 H), 1.88 – 1.66 (m, 2 H), 1.64 – 1.47 (m, 6 H), 1.08 (t,  $J$  = 7.2 Hz, 3 H).  $^{13}C\{^1H\}$  NMR (100 MHz,  $CDCl_3$ )  $\delta$  165.1, 143.9, 126.1, 118.3, 72.7, 60.8, 38.5, 28.8, 22.7, 14.3. HRMS (ESI)  $m/z$ :  $[M + Na]^+$  Calcd for  $C_{17}H_{21}N_5NaO_2$  350.1587, found 350.1586.

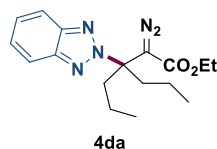

**Ethyl 3-(1-(2H-benzo[d][1,2,3]triazol-2-yl)-2-diazo-3-propylhexanoate**

**(4da)**, new compound: 79.0 mg of **4da** was obtained from **1d** (68.4 mg, 0.3 mmol) and **2a** (42.8 mg, 0.36 mmol) in 80% yield. Purified by column

chromatography (PE/EtOAc = 20/1); slightly yellow oil.  $^1H$  NMR (400 MHz,  $CDCl_3$ )  $\delta$  7.90 – 7.79 (m, 2 H), 7.39 – 7.30 (m, 2 H), 4.07 (q,  $J$  = 7.1 Hz, 2 H), 2.54 – 2.40 (m, 4 H), 1.45 – 1.20 (m, 4 H), 1.11 (t,  $J$  = 7.1 Hz, 3 H), 0.94 (t,  $J$  = 7.1 Hz, 6 H).  $^{13}C\{^1H\}$  NMR (100 MHz,  $CDCl_3$ )  $\delta$  164.8, 143.6, 126.1, 118.3, 70.7, 60.7, 37.1, 16.9, 14.2, 14.0. HRMS (ESI)  $m/z$ :  $[M + Na]^+$  Calcd for  $C_{17}H_{23}N_5NaO_2$  352.1744, found 352.1751.

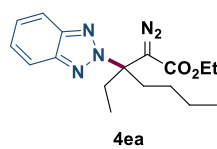

**Ethyl 3-(1-(2H-benzo[d][1,2,3]triazol-2-yl)-2-diazo-3-ethylheptanoate**

**(4ea)**, new compound: 65.1 mg of **4ea** was obtained from **1e** (68.4 mg, 0.3 mmol) and **2a** (42.8 mg, 0.36 mmol) in 66% yield. Purified by column

chromatography (PE/EtOAc = 20/1); slightly yellow oil.  $^1H$  NMR (400 MHz,  $CDCl_3$ )  $\delta$  7.97 – 7.75 (m, 2 H), 7.42 – 7.27 (m, 2 H), 4.22 – 3.94 (m, 2 H), 2.77 – 2.18 (m, 4 H), 1.50 – 1.23 (m, 4 H), 1.23 – 1.02 (m, 3 H), 0.91 – 0.68 (m, 6 H).  $^{13}C\{^1H\}$  NMR (100 MHz,  $CDCl_3$ )  $\delta$  164.8, 143.7, 126.1, 118.3, 71.2, 60.7, 34.0, 28.3, 25.6, 22.6, 14.2, 13.9, 7.9. HRMS (ESI)  $m/z$ :  $[M + K]^+$  Calcd for  $C_{17}H_{23}N_5KO_2$  368.1483, found 368.1471.



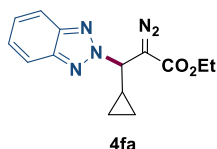

**Ethyl (R)-3-(2H-benzo[d][1,2,3]triazol-2-yl)-3-cyclopropyl-2-diazopropionate (4fa)**, new compound: 42.8 mg of **4fa** was obtained from **1f** (55.2

mg, 0.3 mmol) and **2a** (42.8 mg, 0.36 mmol) in 50% yield. Purified by column chromatography (PE/EtOAc = 20/1); slightly yellow oil.  $^1\text{H}$  NMR (400 MHz,  $\text{CDCl}_3$ )  $\delta$  8.19 – 7.63 (m, 2 H), 7.49 – 7.12 (m, 2 H), 5.20 (d,  $J$  = 9.7 Hz, 1 H), 4.18 (q,  $J$  = 7.2 Hz, 2 H), 1.74 – 1.56 (m, 1 H), 1.23 (t,  $J$  = 7.0 Hz, 3 H), 0.90 – 0.61 (m, 3 H), 0.60 – 0.47 (m, 1 H).  $^{13}\text{C}\{^1\text{H}\}$  NMR (100 MHz,  $\text{CDCl}_3$ )  $\delta$  144.1, 126.3, 118.2, 66.0, 61.3, 14.4, 14.3, 4.7, 4.0. HRMS (ESI)  $m/z$ :  $[\text{M} + \text{Na}]^+$  Calcd for  $\text{C}_{14}\text{H}_{15}\text{N}_5\text{NaO}_2$  308.1118, found 308.1107.

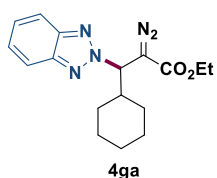

**Ethyl 3-(2H-benzo[d][1,2,3]triazol-2-yl)-3-cyclohexyl-2-diazopropionate (4ga)**, new compound: 44.1 mg of **4ga** was obtained from **1g** (67.8

mg, 0.3 mmol) and **2a** (42.8 mg, 0.36 mmol) in 45% yield. Purified by column chromatography (PE/EtOAc = 20/1); slightly yellow solid. mp 57.2 – 58.3  $^{\circ}\text{C}$ .  $^1\text{H}$  NMR (400 MHz,  $\text{CDCl}_3$ )  $\delta$  7.93 – 7.79 (m, 2 H), 7.49 – 7.32 (m, 2 H), 5.55 (d,  $J$  = 11.1 Hz, 1 H), 4.21 (d,  $J$  = 7.1 Hz, 2 H), 2.29 – 2.13 (m, 1 H), 1.95 – 1.92 (m, 1 H), 1.88 – 1.79 (m, 1 H), 1.72 – 1.56 (m, 3 H), 1.38 – 0.99 (m, 7 H), 0.83 – 0.80 (m, 1 H).  $^{13}\text{C}\{^1\text{H}\}$  NMR (100 MHz,  $\text{CDCl}_3$ )  $\delta$  144.0, 126.3, 118.2, 66.7, 61.3, 40.7, 29.9, 29.3, 25.9, 25.6, 25.1, 14.4. HRMS (ESI)  $m/z$ :  $[\text{M} + \text{Na}]^+$  Calcd for  $\text{C}_{17}\text{H}_{21}\text{N}_5\text{NaO}_2$  350.1587, found 350.1582.

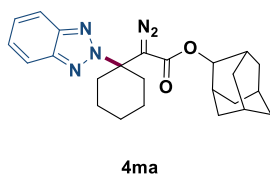

**(1r,5R,7S)-Adamantan-2-yl 2-(1-(2H-benzo[d][1,2,3]triazol-2-yl)cyclohexyl)-2-diazoacetate (4ma)**, new compound: 95.5 mg of

**4ma** was obtained from **1m** (95.4 mg, 0.3 mmol) and **2a** (42.8 mg, 0.36 mmol) in 76% yield. Purified by column chromatography (PE/EtOAc = 20/1); slightly yellow solid. mp 110.7 – 111.9  $^{\circ}\text{C}$ .  $^1\text{H}$  NMR (400 MHz,  $\text{CDCl}_3$ )  $\delta$  7.96 – 7.64 (m, 2 H), 7.43 – 7.32 (m, 2 H), 4.94 – 4.92 (m, 1 H), 2.92 – 2.42 (m, 4 H), 2.06 – 0.83 (m, 20 H).  $^{13}\text{C}\{^1\text{H}\}$  NMR (100 MHz,  $\text{CDCl}_3$ )  $\delta$  164.5, 143.8, 126.0, 118.2, 77.8, 68.7, 37.2, 36.1, 35.2, 31.8, 31.5, 27.0, 26.8, 24.8, 22.8. HRMS (ESI)  $m/z$ :  $[\text{M} + \text{Na}]^+$  Calcd for  $\text{C}_{24}\text{H}_{29}\text{N}_5\text{NaO}_2$  442.2213, found 442.2218.

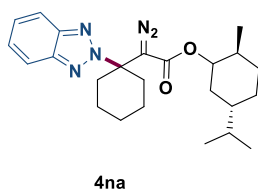

4na

**(2S,5S)-5-isopropyl-2-methylcyclohexyl 2-(1-(2H-benzo[d][1,2,3]triazol-2-yl)cyclohexyl)-2-diazoacetate (4na)**, new compound: 90.1

mg of **4na** was obtained from **1n** (96.6 mg, 0.3 mmol) and **2a** (42.8 mg, 0.36 mmol) in 71% yield. Purified by column chromatography

(PE/EtOAc = 20/1); slightly yellow solid. mp 106.4 – 107.8 °C. <sup>1</sup>H NMR (400 MHz, CDCl<sub>3</sub>) δ 7.91 – 7.75 (m, 2 H), 7.54 – 7.32 (m, 2 H), 4.78 – 4.48 (m, 1 H), 2.74 – 2.41 (m, 4 H), 1.93 – 1.34 (m, 12 H), 1.01 – 0.75 (m, 6 H), 0.71 (d, *J* = 7.0 Hz, 3 H), 0.60 (d, *J* = 6.9 Hz, 3 H). <sup>13</sup>C{<sup>1</sup>H} NMR (100 MHz, CDCl<sub>3</sub>) δ 143.8, 126.1, 118.2, 74.9, 69.0, 47.1, 41.1, 35.6, 35.2, 34.1, 31.3, 26.1, 24.9, 23.4, 22.8, 22.8, 21.9, 20.6, 16.2. HRMS (ESI) *m/z*: [M + Na]<sup>+</sup> Calcd for C<sub>24</sub>H<sub>33</sub>N<sub>5</sub>NaO<sub>2</sub> 446.2526, found 446.2531.

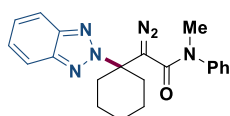

4oa

**2-(1-(2H-benzo[d][1,2,3]triazol-2-yl)cyclohexyl)-2-diazo-N-methyl-N-phenylacetamide (4oa)**, new compound: 78.5 mg of **4oa** was obtained

from **1o** (81.9 mg, 0.3 mmol) and **2a** (42.8 mg, 0.36 mmol) in 70% yield.

Purified by column chromatography (PE/EtOAc = 20/1); slightly yellow solid. mp 118.8 – 119.6 °C. <sup>1</sup>H NMR (400 MHz, CDCl<sub>3</sub>) δ 7.91 – 7.81 (m, 2 H), 7.41 – 7.31 (m, 5 H), 7.18 – 7.03 (m, 2 H), 3.24 (s, 3 H), 2.71 – 2.45 (m, 4 H), 1.80 – 1.35 (m, 6 H). <sup>13</sup>C{<sup>1</sup>H} NMR (100 MHz, CDCl<sub>3</sub>) δ 164.2, 143.9, 143.8, 129.9, 126.9, 125.9, 125.6, 118.3, 69.7, 62.7, 38.4, 34.9, 25.0, 22.9. HRMS (ESI) *m/z*: [M + Na]<sup>+</sup> Calcd for C<sub>21</sub>H<sub>22</sub>N<sub>6</sub>ONa 397.1747, found 397.1736.

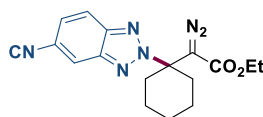

4ab

**Ethyl 2-(1-(4-cyano-2H-benzo[d][1,2,3]triazol-2-yl)cyclohexyl)-2-diazoacetate (4ab)**, new compound: 75.0 mg of **4ab** was obtained

from **1a** (63.6 mg, 0.3 mmol) and **2b** (51.8 mg, 0.36 mmol) in 74% yield.

Purified by column chromatography (PE/EtOAc = 20/1); slightly yellow solid. mp 97.7 – 98.9 °C. <sup>1</sup>H NMR (400 MHz, CDCl<sub>3</sub>) δ 8.31 (s, 1 H), 8.07 – 7.86 (m, 1 H), 7.69 – 7.45 (m, 1 H), 4.14 (q, *J* = 7.1 Hz, 2 H), 2.82 – 2.42 (m, 4 H), 1.93 – 1.66 (m, 2 H), 1.64 – 1.42 (m, 4 H), 1.21 (t, *J* = 7.1 Hz, 3 H). <sup>13</sup>C{<sup>1</sup>H} NMR (100 MHz, CDCl<sub>3</sub>) δ 164.5, 144.9, 142.6, 127.1, 125.6, 120.1, 118.9, 109.6, 70.3, 60.9, 35.1, 24.7, 22.7, 14.2. HRMS (ESI) *m/z*: [M + Na]<sup>+</sup> Calcd for C<sub>17</sub>H<sub>18</sub>N<sub>6</sub>NaO<sub>2</sub> 361.1383, found 361.1384.

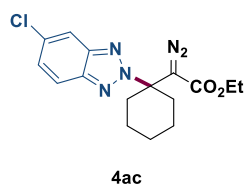

**Ethyl 2-(1-(5-chloro-2H-benzo[d][1,2,3]triazol-2-yl)cyclohexyl) -2-**

**diazoacetate (4ac)**, new compound: 95.8 mg of **4ac** was obtained from **1a** (63.6 mg, 0.3 mmol) and **2c** (55.3 mg, 0.36 mmol) in 92% yield.

Purified by column chromatography (PE/EtOAc = 20/1); slightly yellow

oil. <sup>1</sup>H NMR (400 MHz, CDCl<sub>3</sub>) δ 7.92 – 7.76 (m, 2 H), 7.37 – 7.28 (m, 1 H), 4.14 (q, *J* = 7.1 Hz, 2 H), 2.81 – 2.31 (m, 4 H), 2.02 – 1.67 (m, 2 H), 1.66 – 1.39 (m, 4 H), 1.20 (t, *J* = 7.1 Hz, 3 H). <sup>13</sup>C{<sup>1</sup>H} NMR (100 MHz, CDCl<sub>3</sub>) δ 164.7, 144.2, 142.3, 131.9, 127.6, 119.5, 117.4, 69.2, 60.8, 35.1, 24.8, 22.7, 14.3. HRMS (ESI) *m/z*: [M + Na]<sup>+</sup> Calcd for C<sub>16</sub>H<sub>18</sub>ClN<sub>5</sub>NaO<sub>2</sub> 370.1041, found 370.1033.

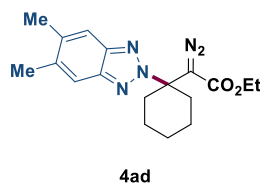

**Ethyl 2-diazo-2-(1-(5,6-dimethyl-2H-benzo[d][1,2,3]triazol-2-yl)**

**cyclohexyl)acetate (4ad)**, new compound: 51.2 mg of **4ad** was obtained from **1a** (63.6 mg, 0.3 mmol) and **2d** (52.3 mg, 0.36 mmol) in

50% yield. Purified by column chromatography (PE/EtOAc = 20/1);

slightly yellow oil. <sup>1</sup>H NMR (400 MHz, CDCl<sub>3</sub>) δ 7.59 (s, 2 H), 4.13 (q, *J* = 7.1 Hz, 2 H), 2.92 – 2.49 (m, 4 H), 2.37 (s, 6 H), 1.89 – 1.42 (m, 6 H), 1.19 (t, *J* = 7.1 Hz, 3 H). <sup>13</sup>C{<sup>1</sup>H} NMR (100 MHz, CDCl<sub>3</sub>) δ 164.7, 143.2, 136.4, 116.7, 68.1, 60.6, 35.0, 24.8, 22.7, 20.8, 14.2. HRMS (ESI) *m/z*: [M + Na]<sup>+</sup> Calcd for C<sub>18</sub>H<sub>23</sub>N<sub>5</sub>NaO<sub>2</sub> 364.1744, found 364.1746.

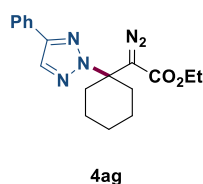

**Ethyl 2-diazo-2-(1-(4-phenyl-2H-1,2,3-triazol-2-yl)cyclohexyl)acetate**

**(4ag)**, new compound: 62.0 mg of **4ag** was obtained from **1a** (63.6 mg, 0.3 mmol) and **2g** (52.2 mg, 0.36 mmol) in 61% yield. Purified by column

chromatography (PE/EtOAc = 20/1); slightly yellow oil. <sup>1</sup>H NMR (400 MHz,

CDCl<sub>3</sub>) δ 7.85 (s, 1 H), 7.82 – 7.78 (m, 2 H), 7.45 – 7.39 (m, 2 H), 7.37 – 7.31 (m, 1 H), 4.17 (q, *J* = 7.1 Hz, 2 H), 2.65 – 2.30 (m, 4 H), 1.81 – 1.35 (m, 6 H), 1.23 (t, *J* = 7.1 Hz, 3 H). <sup>13</sup>C{<sup>1</sup>H} NMR (100 MHz, CDCl<sub>3</sub>) δ 164.8, 147.2, 130.6, 130.5, 128.7, 128.2, 125.8, 66.6, 60.6, 34.5, 24.8, 22.6, 14.3. HRMS (ESI) *m/z*: [M + Na]<sup>+</sup> Calcd for C<sub>18</sub>H<sub>21</sub>N<sub>5</sub>NaO<sub>2</sub> 362.1587, found 362.1584.

### Crystallographic Data for Compound **3ga**

Crystallization of **3ga** (30 mg) was dissolved in 1 mL of  $\text{CHCl}_3$ . Then **3ga** were sealed in a 6.5 cm glass ampule with 5 mL of PE, the  $\text{CHCl}_3/\text{PE} = 1 : 5$  (volume ratio). The ampule was placed in a refrigerator at 25 °C and kept at that temperature for 48 hours. Yellow block was crystals deposited in the glass ampule. The data were collected on a Bruker D8 Venture CCD diffractometer.

A good-quality single-crystal of **3ga** was respectively picked carefully and their diffraction intensity data were collected on a Bruker Apex II diffractometer equipped with CCD two-dimensional detector using monochromated  $\text{Mo K}\alpha$  radiation ( $\lambda = 0.71073 \text{ \AA}$ ) at 150.0 K.

Routine Lorentz and polarization corrections were applied and a multi-scan absorption correction was utilized with the SADABS program. Direct methods were used to solve the structures, refined on  $F^2$  by full-matrix least-squares method, using the SHELXTL-97 program. All H atoms connected to C atoms were generated geometrically and refined isotropically as a riding model using the default Olex2 parameters.

The ellipsoid contour 30% probability levels in the caption for the image of the structure.

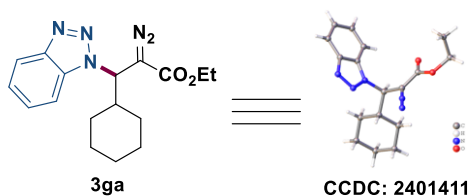

Single crystal structure of **3ga**

### Crystallographic Data for Compound **3oa**

Crystallization of **3oa** (30 mg) was dissolved in 1 mL of acetone. Then **3oa** were sealed in a 6.5 cm glass ampule with 5 mL of PE, the acetone/PE = 1 : 5 (volume ratio). The ampule was placed in a refrigerator at 25 °C and kept at that temperature for 48 hours. Yellow block was crystals deposited in the glass ampule. The data were collected on a Bruker D8 Venture CCD diffractometer.

A good-quality single-crystal of **3oa** was respectively picked carefully and their diffraction intensity data were collected on a Bruker Apex II diffractometer equipped with CCD two-

dimensional detector using monochromated Mo K $\alpha$  radiation ( $\lambda = 0.71073$  Å) at 150.0 K. Routine Lorentz and polarization corrections were applied and a multi-scan absorption correction was utilized with the SADABS program. Direct methods were used to solve the structures, refined on F<sup>2</sup> by full-matrix least-squares method, using the SHELXTL-97 program. All H atoms connected to C atoms were generated geometrically and refined isotropically as a riding model using the default Olex2 parameters.

The ellipsoid contour 30% probability levels in the caption for the image of the structure.

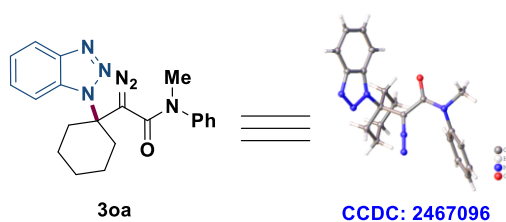

Single crystal structure of **3a**

## Gram-Scale Synthesis of 3aa and 4aa

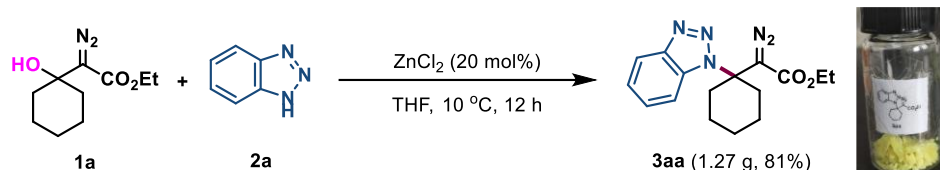

To a 100 mL tube with a stir bar was added ethyl 2-diazo-2-(1-hydroxycyclohexyl)acetate **1a** (5 mmol, 1 equiv, 1.06 g), benzotriazole **2a** (6 mmol, 1.2 equiv, 0.714 g) and THF (15 mL), followed by  $\text{ZnCl}_2$  (1 mmol, 20 mol%, 0.14 g). Then tube was tightly screw capped. The mixture was stirred at 10 °C under the for 12 h. The solvents were evaporated in vacuo, and the residue was purified by flash column chromatography (PE/EtOAc = 10/1), affording the desired product **3aa** (1.27 g, 81% yield).

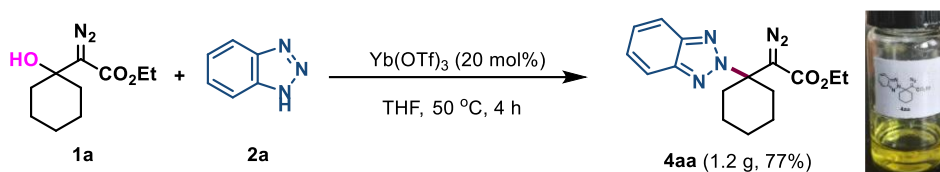

To a 100 mL tube with a stir bar was added ethyl 2-diazo-2-(1-hydroxycyclohexyl)acetate **1a** (5 mmol, 1 equiv, 1.06 g), benzotriazole **2a** (6 mmol, 1.2 equiv, 0.714 g) and THF (15 mL), followed by  $\text{Yb(OTf)}_3$  (1 mmol, 20 mol%, 0.62 g). Then tube was tightly screw capped. The mixture was stirred at 50°C under the for 4 h. The solvents were evaporated in vacuo, and the residue was purified by flash column chromatography (PE/EtOAc = 20/1), affording the desired product **4aa** (1.2 g, 77% yield).

## Control Experiments

### (a) Transformation of 3aa and 4aa

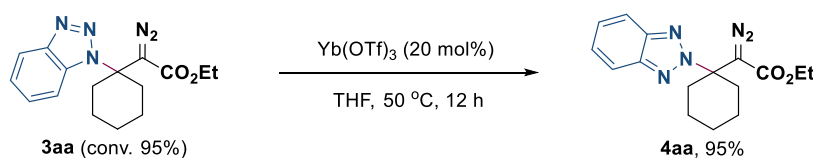

To a 5 mL tube equipped with a stir bar were added ethyl 2-(1-(1H-benzo[d][1,2,3]triazol-1-yl)cyclohexyl)-2-diazoacetate **3aa** (0.3 mmol, 1 equiv) and THF (2 mL), followed by  $\text{Yb(OTf)}_3$  (20 mol%). The mixture was stirred at 50 °C for 12 h, yielding ethyl 2-(1-(2H-

benzo[d][1,2,3]triazol-2-yl)cyclohexyl)-2-diazoacetate **4aa** (89.2 mg, 95% yield) as the *N*<sup>2</sup>-product. The product was purified by column chromatography (PE/EtOAc = 10/1) to give a slightly yellow oil.

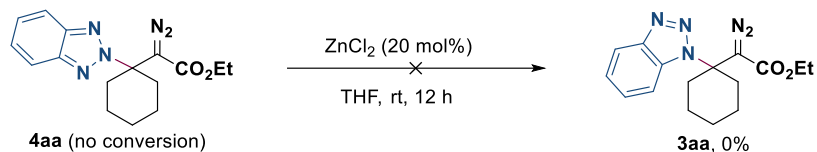

To a 5 mL tube equipped with a stir bar were added ethyl 2-(1-(2H-benzo[d][1,2,3]triazol-2-yl)cyclohexyl)-2-diazoacetate **4aa** (0.3 mmol, 1 equiv) and THF (2 mL), followed by ZnCl<sub>2</sub> (20 mol%). The mixture was stirred at room temperature for 12 h. No reaction was observed by TLC analysis, as the starting material **4aa** remained unchanged.

### (b) Crossover experiments: intramolecular and intermolecular

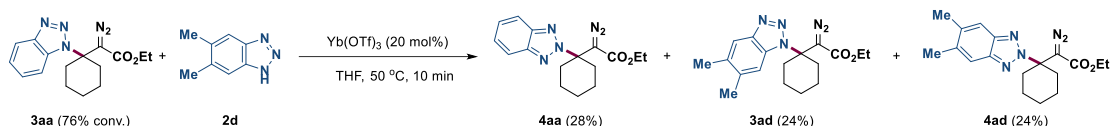

To a 5 mL tube equipped with a stir bar were added ethyl 2-(1-(1H-benzo[d][1,2,3]triazol-1-yl)cyclohexyl)-2-diazoacetate **3aa** (0.3 mmol, 1 equiv), 5,6-dimethyl-1H-benzo[d][1,2,3]triazole **2d** and THF (2 mL), followed by Yb(OTf)<sub>3</sub> (20 mol%). The reaction mixture was stirred at 50 °C for 10 min, yielding a mixture of three products: ethyl 2-(1-(2H-benzo[d][1,2,3]triazol-2-yl)cyclohexyl)-2-diazoacetate (**4aa**, 28%), ethyl 2-diazo-2-(1-(5,6-dimethyl-1H-benzo[d][1,2,3]triazol-1-yl)cyclohexyl)acetate (**3ad**, 24%), and ethyl 2-diazo-2-(1-(5,6-dimethyl-2H-benzo[d][1,2,3]triazol-2-yl)cyclohexyl)acetate (**4ad**, 24%).

### (c) Diazoles Instead of Triazoles

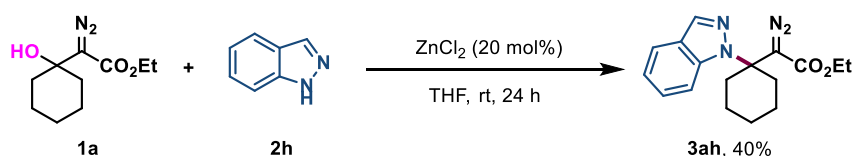

To a 5 mL tube with a stir bar was added ethyl 2-diazo-2-(1-hydroxycyclohexyl)acetate **1a** (0.3 mmol, 1 equiv), 1*H*-indazole **2h** (0.36 mmol, 1.2 equiv) and THF (2 mL), followed by ZnCl<sub>2</sub> (20 mol%). Then tube was tightly screw capped. The mixture was stirred at room temperature

for 24 h. The solvents were evaporated in vacuo, and the residue was purified by flash column chromatography (PE/EtOAc = 10/1), affording the desired *N*<sup>1</sup>-product **3ah** (37.4 mg, 40% yield).

**Ethyl 2-(1-(1*H*-indazol-1-yl)cyclohexyl)-2-diazoacetate (3ah)**, new compound: 37.4 mg of **3ah** was obtained from **1a** (63.6 mg, 0.3 mmol) and **2h** (42.3 mg, 0.36 mmol) in 40% yield. Purified by column chromatography (PE/EtOAc = 10/1); slightly yellow oil. <sup>1</sup>H NMR (400 MHz, CDCl<sub>3</sub>) δ 8.22 (d, *J* = 1.0 Hz, 1 H), 8.02 – 7.57 (m, 2 H), 7.34 – 7.19 (m, 1 H), 7.12 – 6.89 (m, 1 H), 4.11 (q, *J* = 7.1 Hz, 2 H), 3.09 – 2.64 (m, 2 H), 2.64 – 2.34 (m, 2 H), 1.81 – 1.44 (m, 6 H), 1.20 (t, *J* = 7.1 Hz, 3 H). <sup>13</sup>C{<sup>1</sup>H} NMR (100 MHz, CDCl<sub>3</sub>) δ 165.0, 148.3, 125.9, 121.3, 121.0 (2C, overlap), 120.5, 117.5, 63.5, 60.6, 34.8, 24.9, 22.5, 14.2. HRMS (ESI) *m/z*: [M + H]<sup>+</sup> Calcd for C<sub>17</sub>H<sub>21</sub>N<sub>4</sub>O<sub>2</sub> 313.1659, found 313.1663.

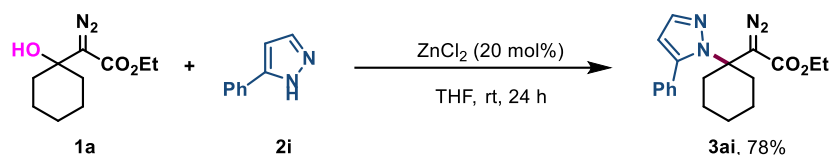

To a 5 mL tube with a stir bar was added ethyl 2-diazo-2-(1-hydroxycyclohexyl)acetate **1a** (0.3 mmol, 1 equiv), 5-phenyl-1*H*-pyrazole **2i** (0.36 mmol, 1.2 equiv) and THF (2 mL), followed by ZnCl<sub>2</sub> (20 mol%). Then tube was tightly screw capped. The mixture was stirred at room temperature for 24 h. The solvents were evaporated in vacuo, and the residue was purified by flash column chromatography (PE/EtOAc = 10/1), affording the desired *N*<sup>1</sup>-product **3ai** (79.1 mg, 78% yield). **Ethyl 2-diazo-2-(1-(5-phenyl-1*H*-pyrazol-1-yl)cyclohexyl)acetate (3ai)**, new compound: 79.1 mg of **3ai** was obtained from **1a** (63.6 mg, 0.3 mmol) and **2i** (51.8 mg, 0.36 mmol) in 78% yield. Purified by column chromatography (PE/EtOAc = 10/1); slightly yellow oil. <sup>1</sup>H NMR (400 MHz, CDCl<sub>3</sub>) δ 7.77 – 7.67 (m, 2 H), 7.55 (d, *J* = 2.4 Hz, 1 H), 7.34 – 7.20 (m, 2 H), 7.22 – 7.07 (m, 1 H), 6.57 – 6.23 (m, 1 H), 4.02 (q, *J* = 7.1 Hz, 2 H), 2.63 – 2.40 (m, 2 H), 2.34 – 2.14 (m, 2 H), 1.71 – 1.27 (m, 6 H), 1.10 (t, *J* = 7.1 Hz, 3 H). <sup>13</sup>C{<sup>1</sup>H} NMR (100 MHz, CDCl<sub>3</sub>) δ 165.2, 150.8, 133.8, 128.4, 127.4, 125.5, 101.9, 61.7, 60.4, 34.4, 24.9, 22.4, 14.3. HRMS (ESI) *m/z*: [M + H]<sup>+</sup> Calcd for C<sub>19</sub>H<sub>23</sub>N<sub>4</sub>O<sub>2</sub> 339.1816, found 339.1822.



<sup>1</sup>H NMR (400 MHz, CDCl<sub>3</sub>) Spectrum of **3aa**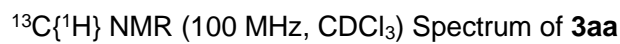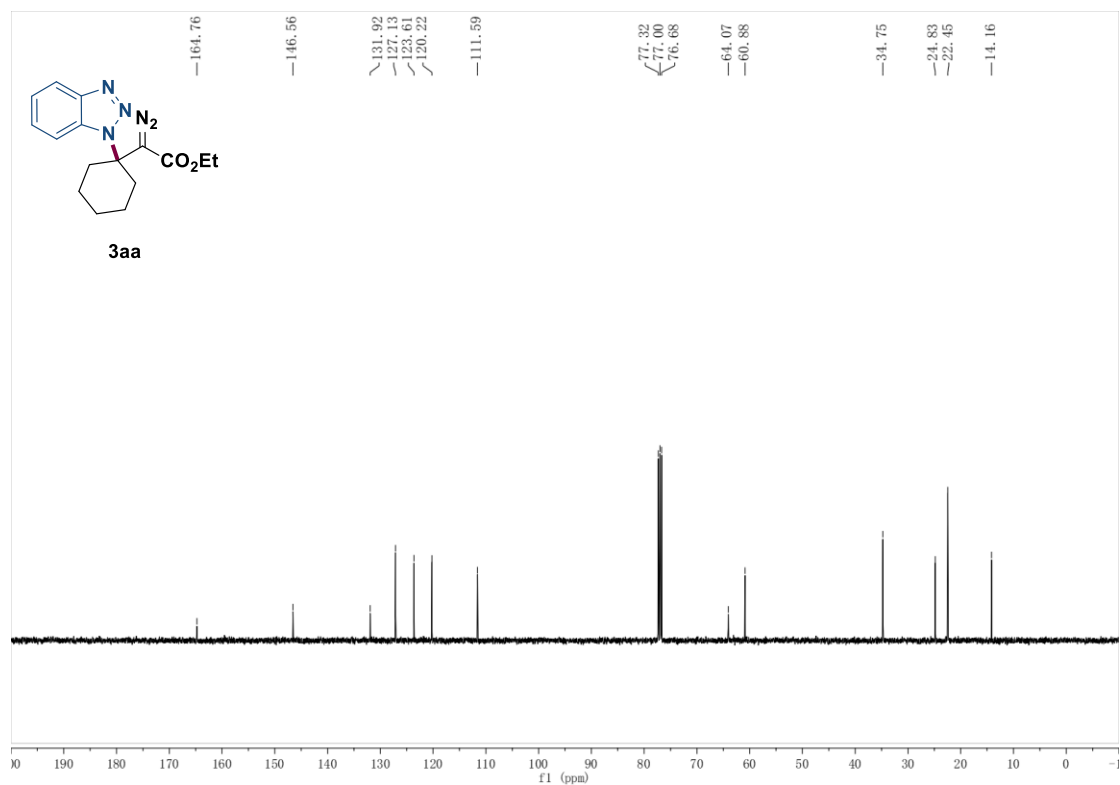

<sup>1</sup>H NMR (400 MHz, CDCl<sub>3</sub>) Spectrum of **3ba**

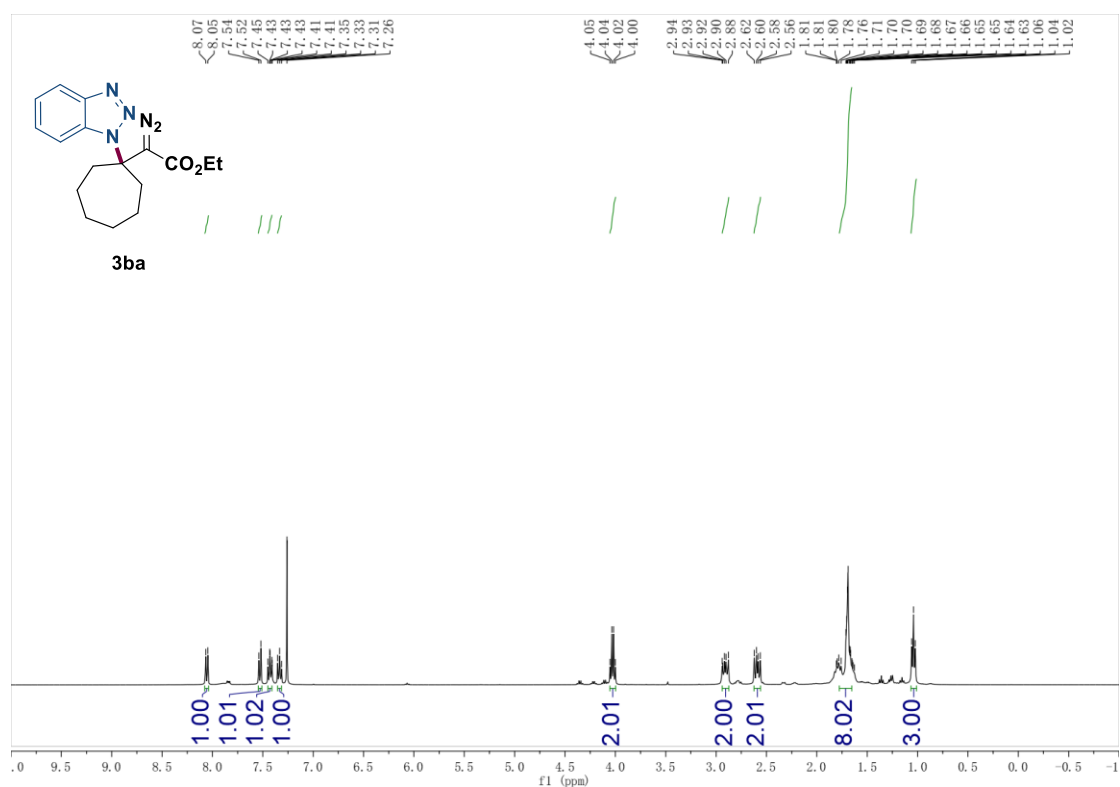

<sup>13</sup>C{<sup>1</sup>H} NMR (100 MHz, CDCl<sub>3</sub>) Spectrum of **3ba**

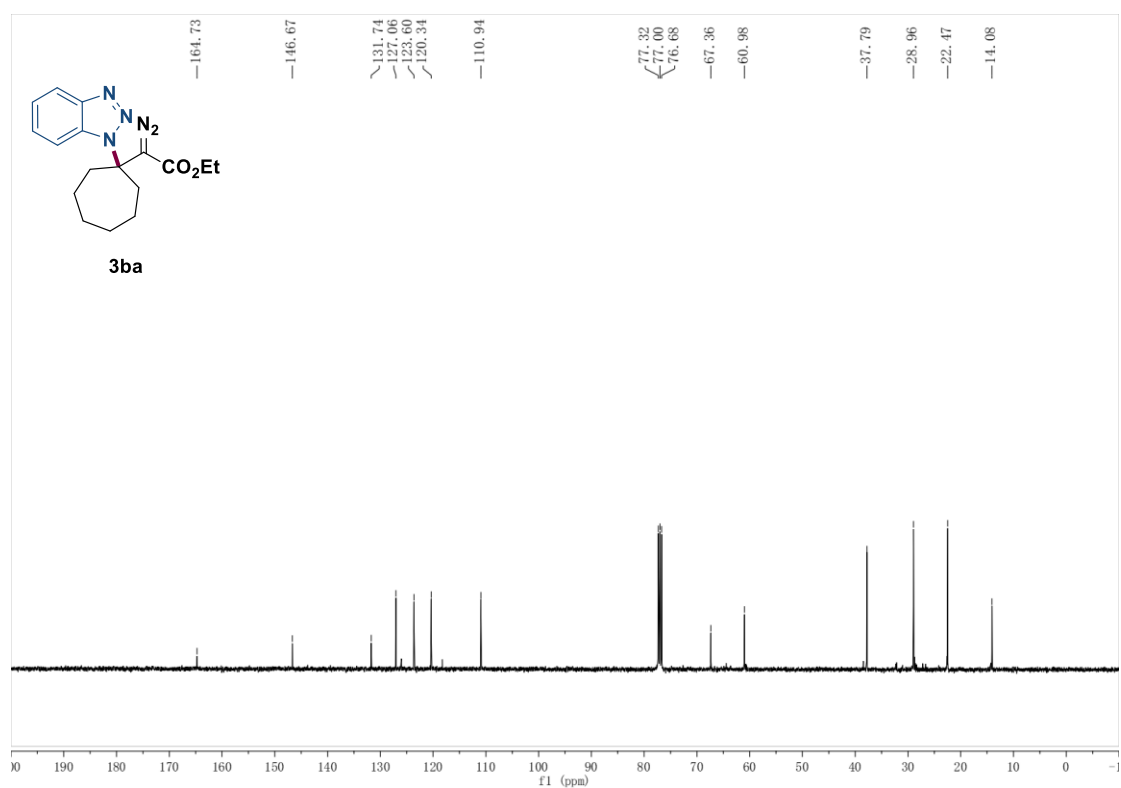

<sup>1</sup>H NMR (400 MHz, CDCl<sub>3</sub>) Spectrum of **3ca**

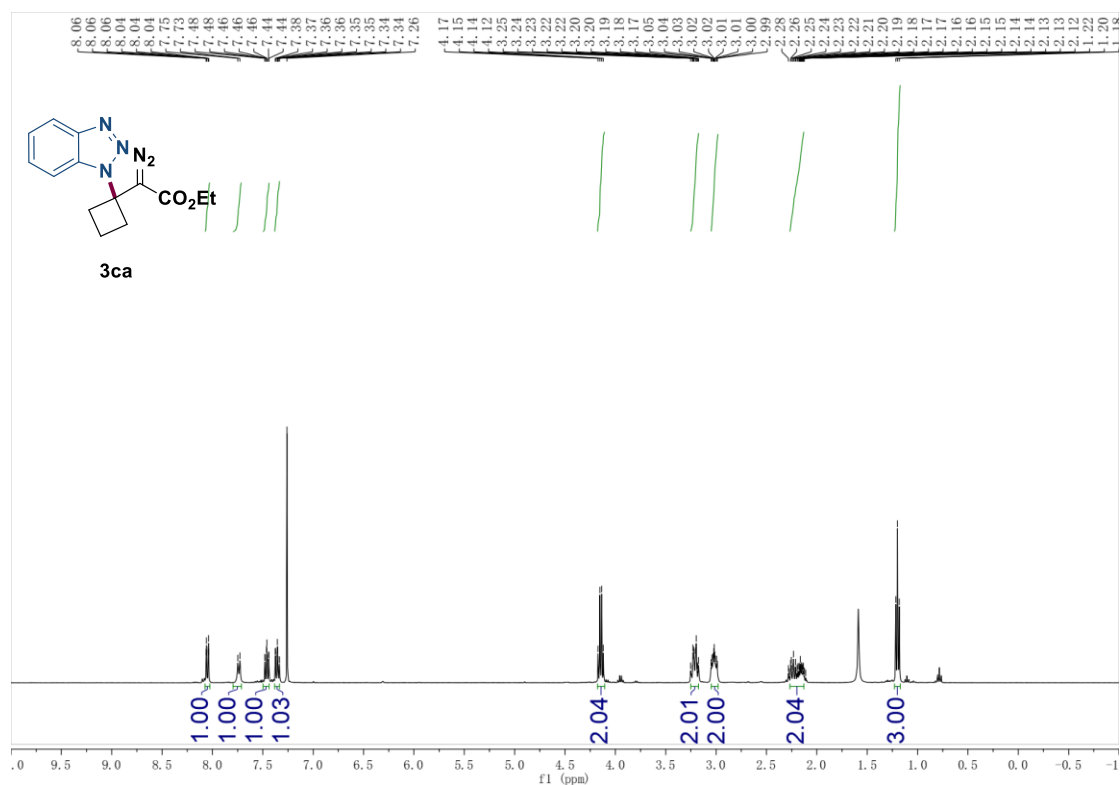

<sup>13</sup>C{<sup>1</sup>H} NMR (100 MHz, CDCl<sub>3</sub>) Spectrum of **3ca**

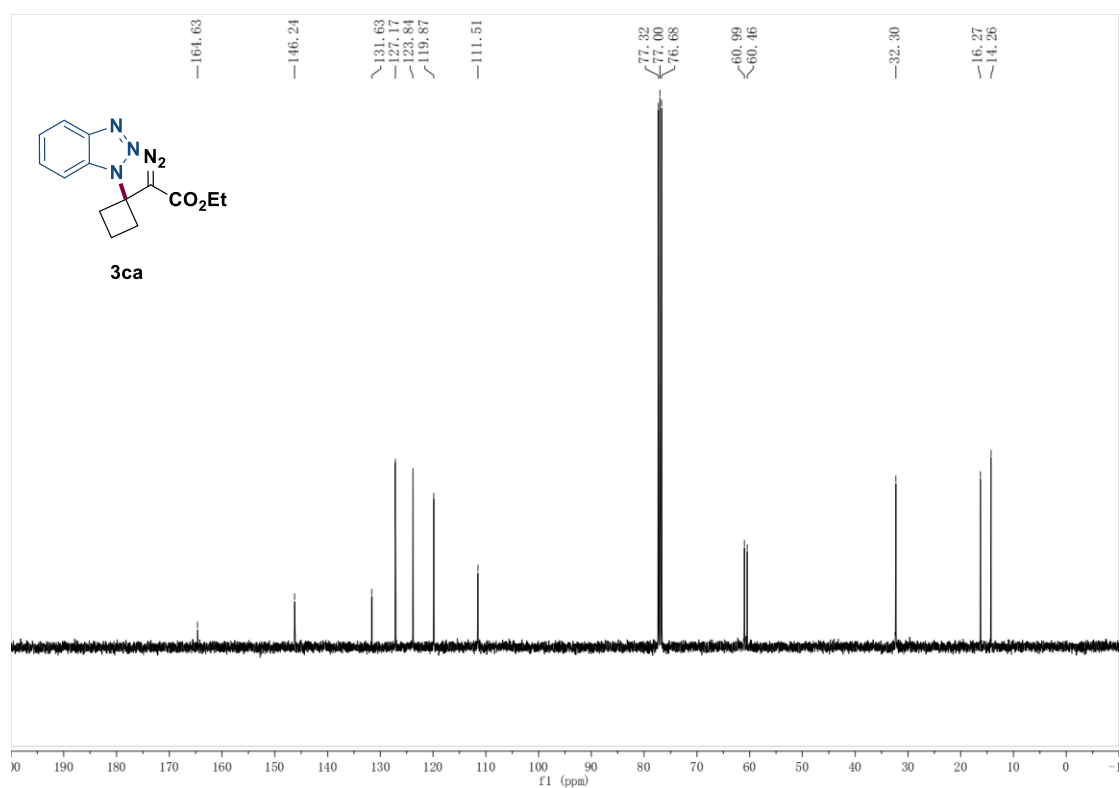

<sup>1</sup>H NMR (400 MHz, CDCl<sub>3</sub>) Spectrum of **3da**

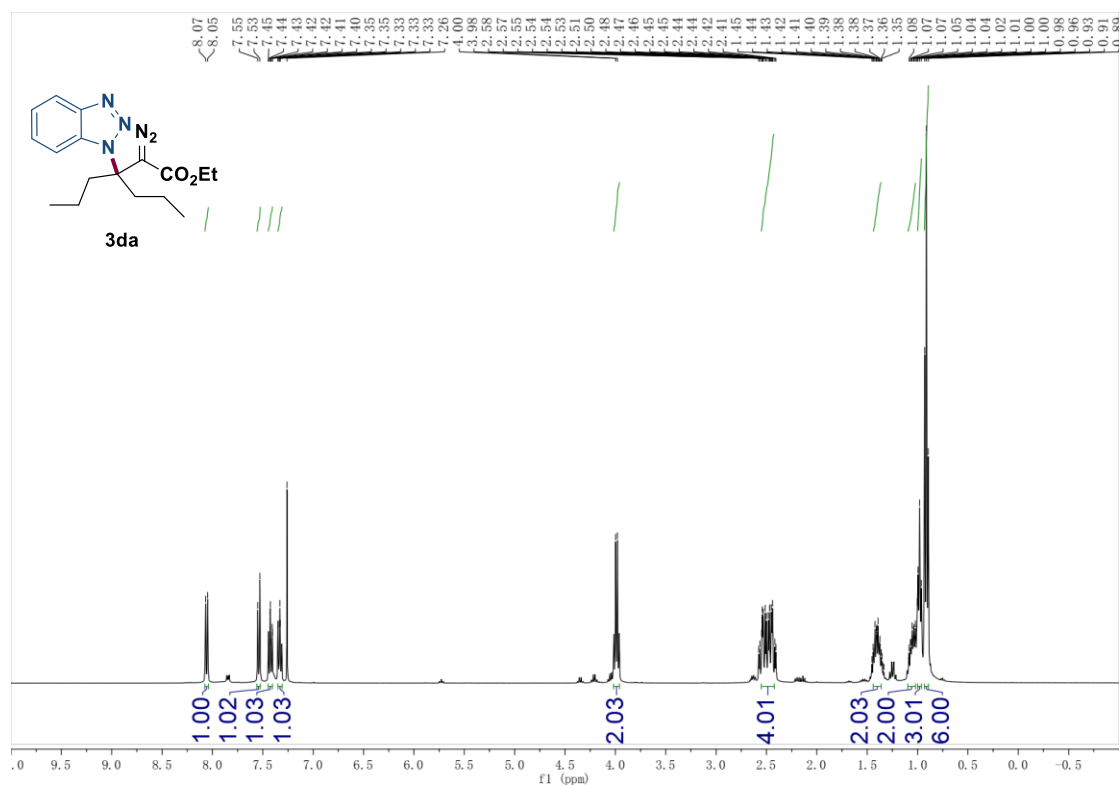

<sup>13</sup>C{<sup>1</sup>H} NMR (100 MHz, CDCl<sub>3</sub>) Spectrum of **3da**

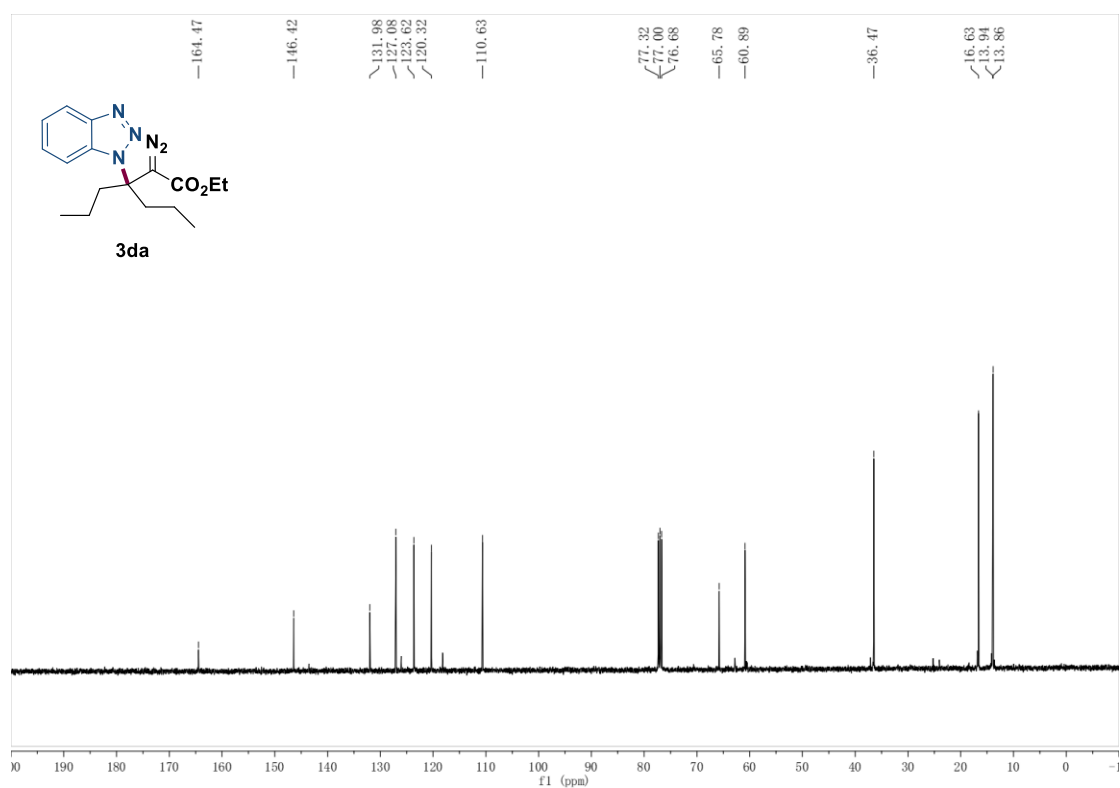

$^1\text{H}$  NMR (400 MHz,  $\text{CDCl}_3$ ) Spectrum of **3ea**

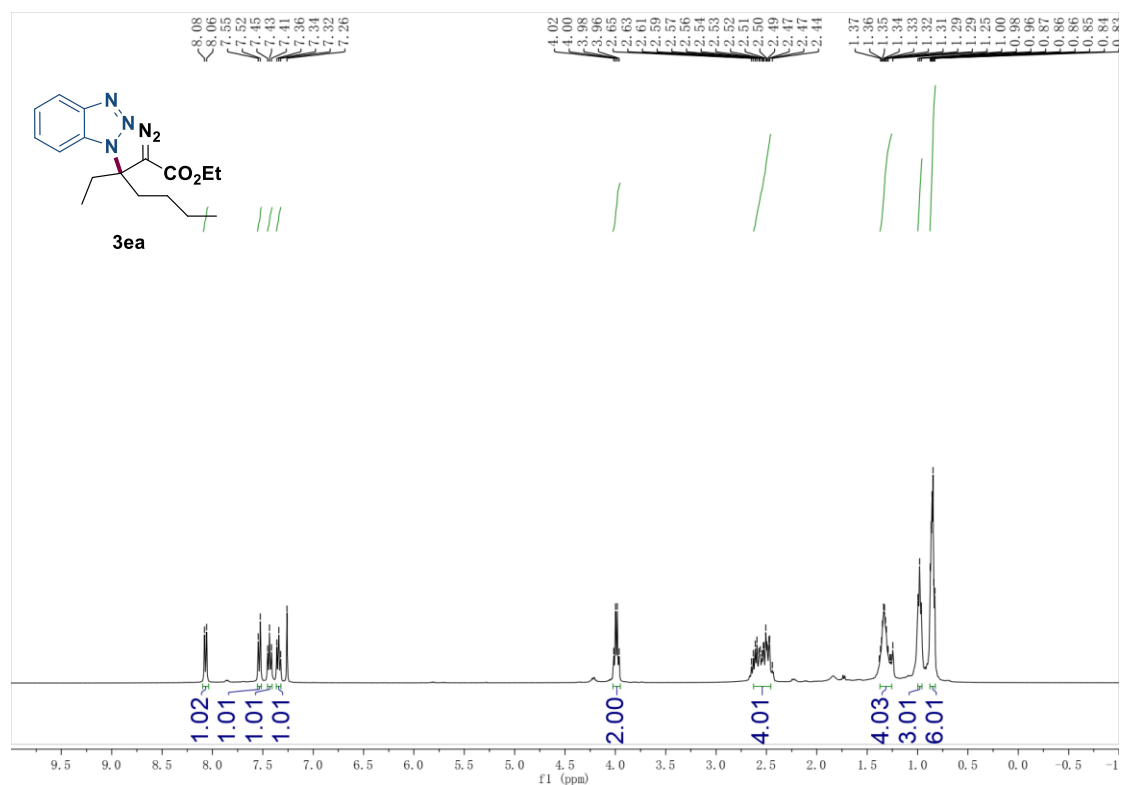

$^{13}\text{C}\{^1\text{H}\}$  NMR (100 MHz,  $\text{CDCl}_3$ ) Spectrum of **3ea**

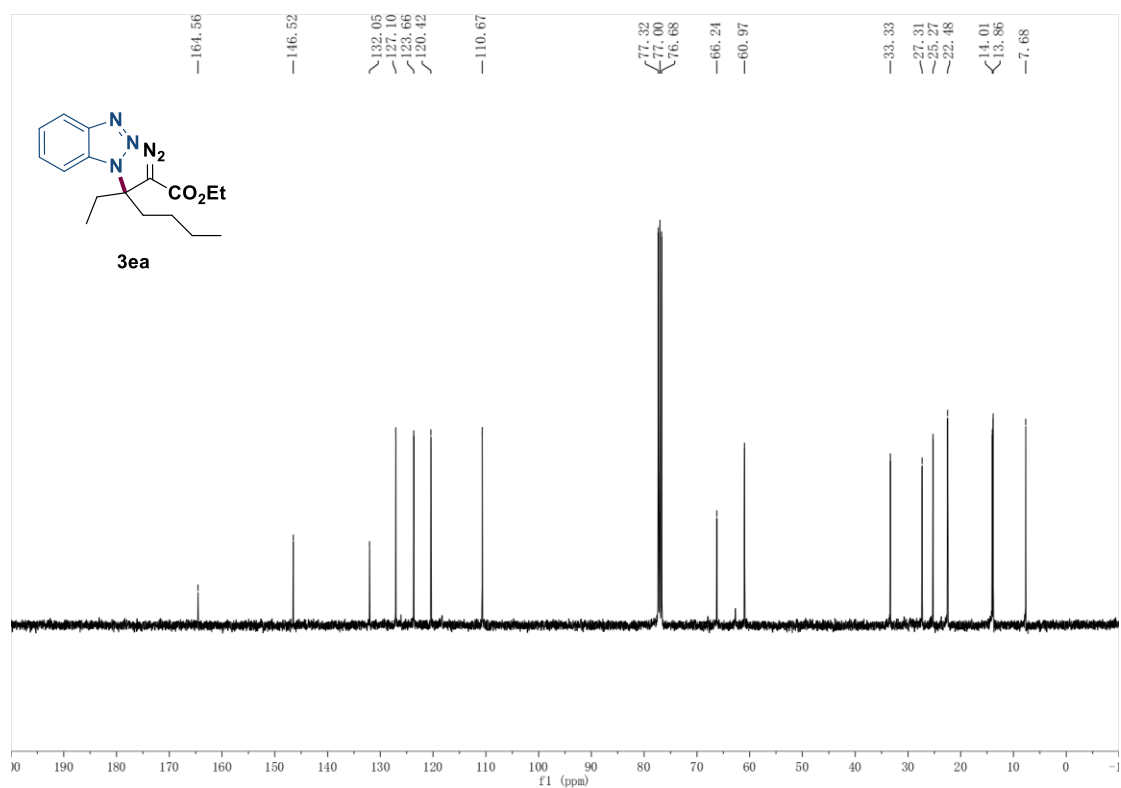

<sup>1</sup>H NMR (400 MHz, CDCl<sub>3</sub>) Spectrum of **3fa**

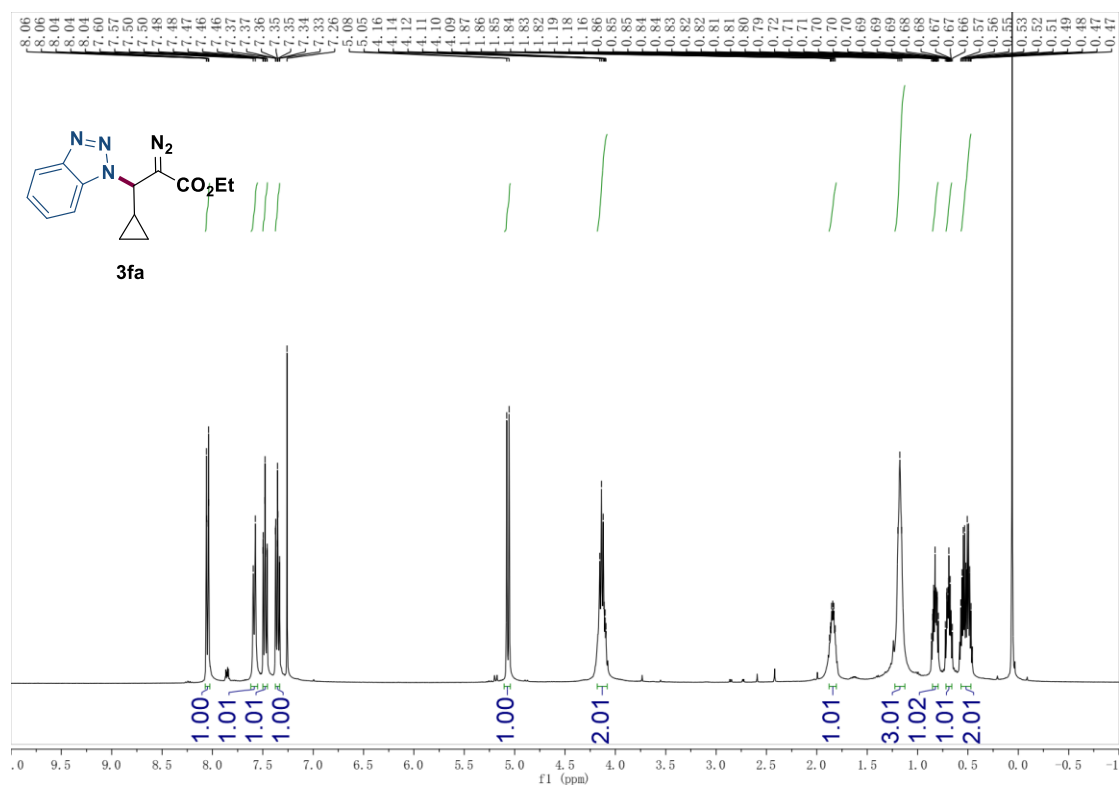

<sup>13</sup>C{<sup>1</sup>H} NMR (100 MHz, CDCl<sub>3</sub>) Spectrum of **3fa**

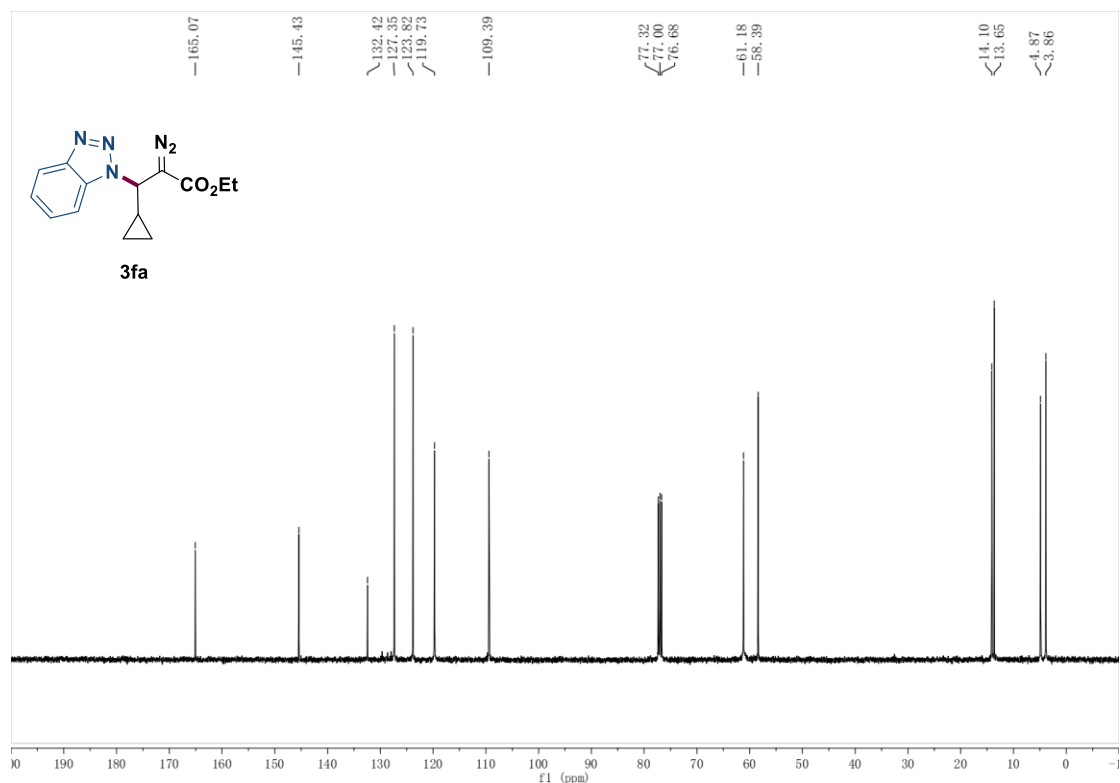

<sup>1</sup>H NMR (400 MHz, CDCl<sub>3</sub>) Spectrum of **3ga**

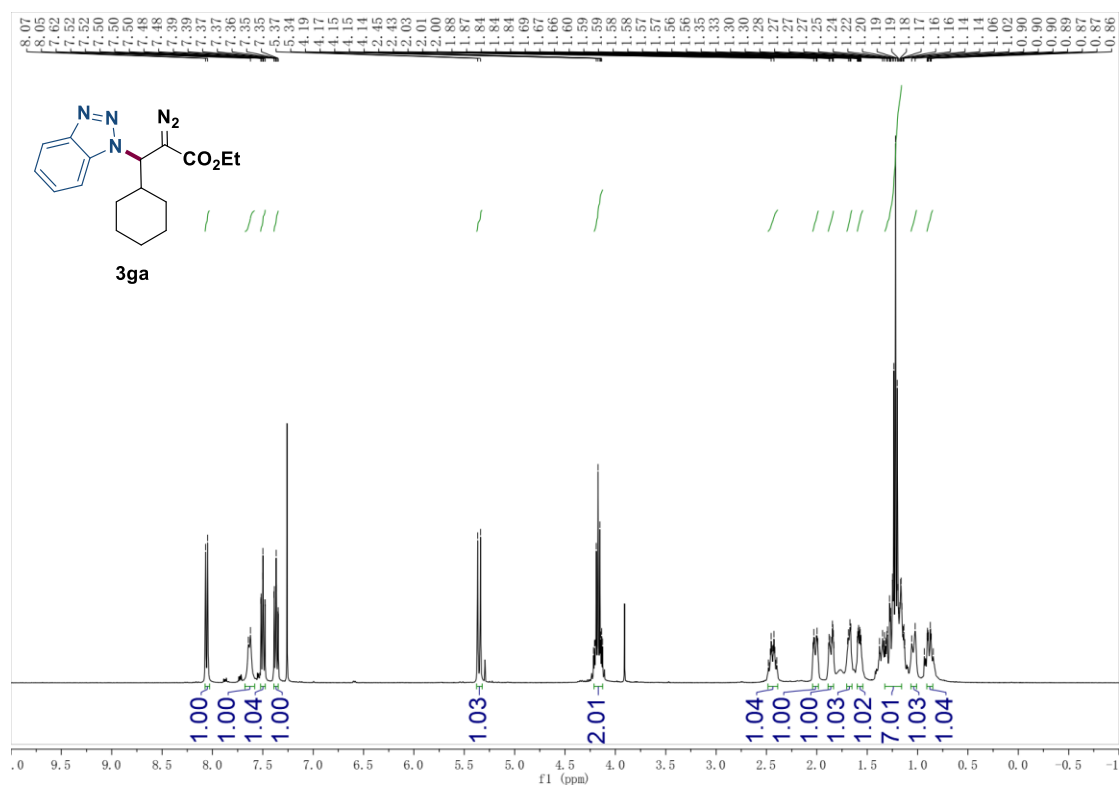

<sup>13</sup>C{<sup>1</sup>H} NMR (100 MHz, CDCl<sub>3</sub>) Spectrum of **3ga**

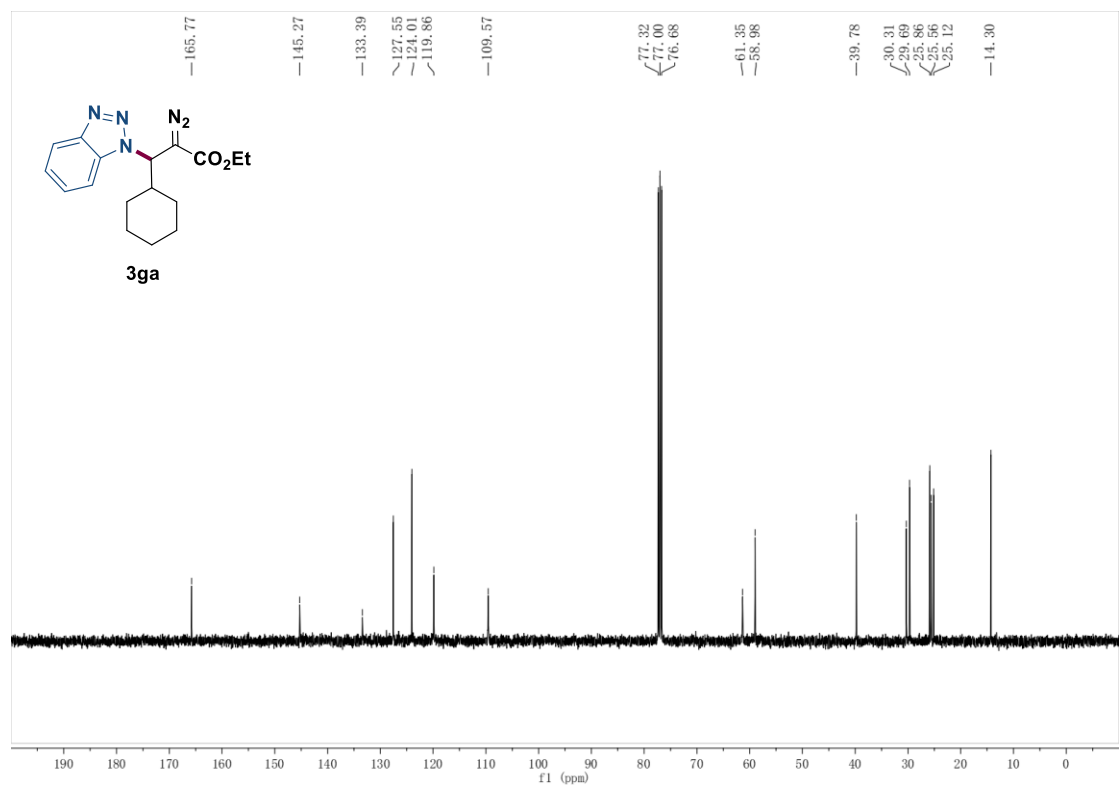

$^1\text{H}$  NMR (400 MHz,  $\text{CDCl}_3$ ) Spectrum of **3ha**

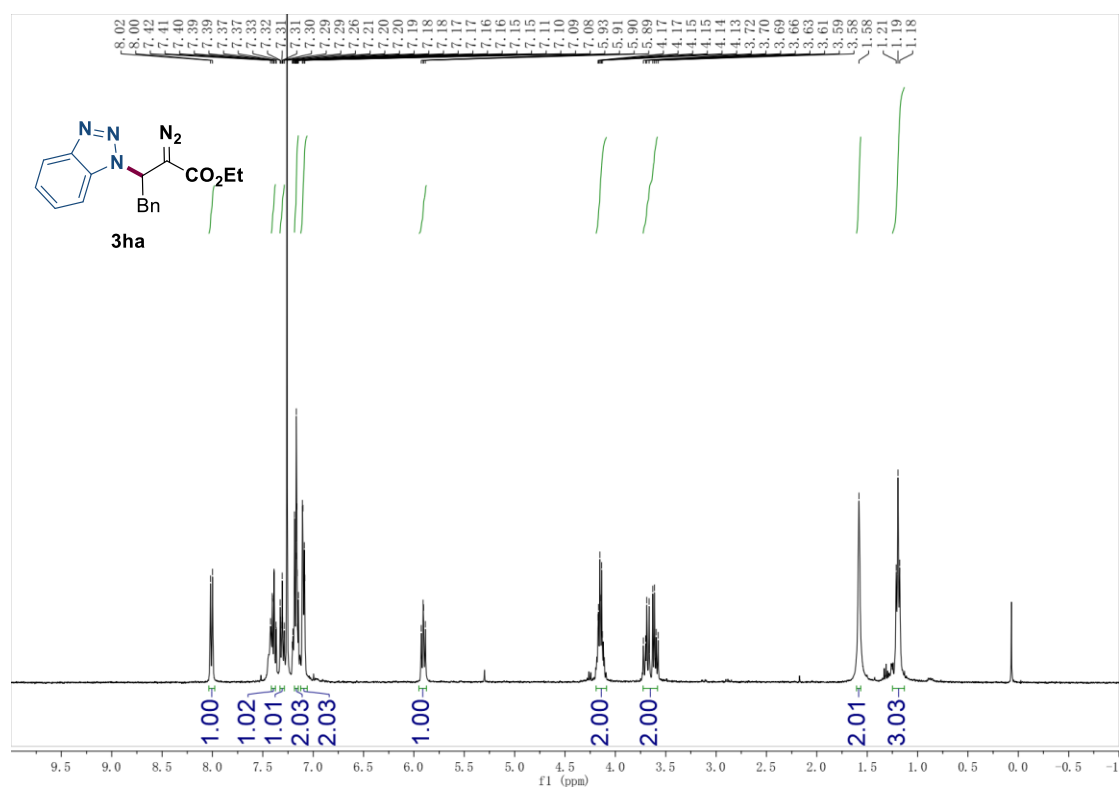

$^{13}\text{C}\{^1\text{H}\}$  NMR (100 MHz,  $\text{CDCl}_3$ ) Spectrum of **3ha**

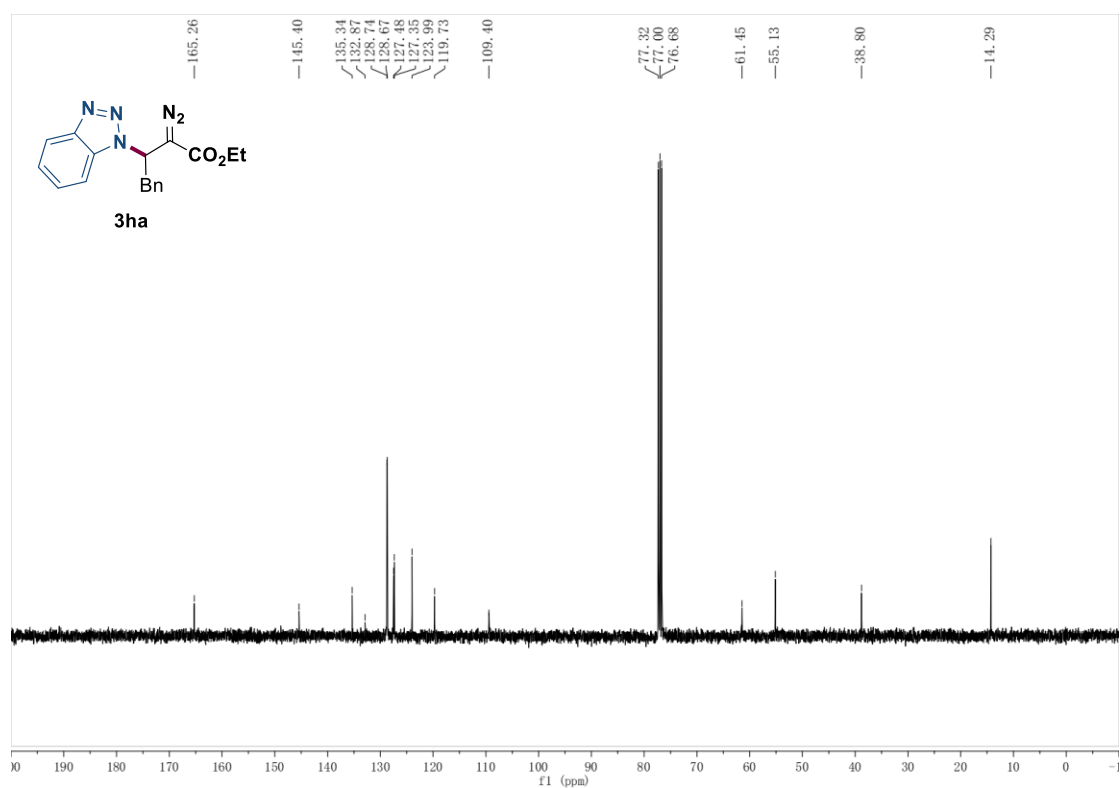



<sup>1</sup>H NMR (400 MHz, CDCl<sub>3</sub>) Spectrum of **3ia**

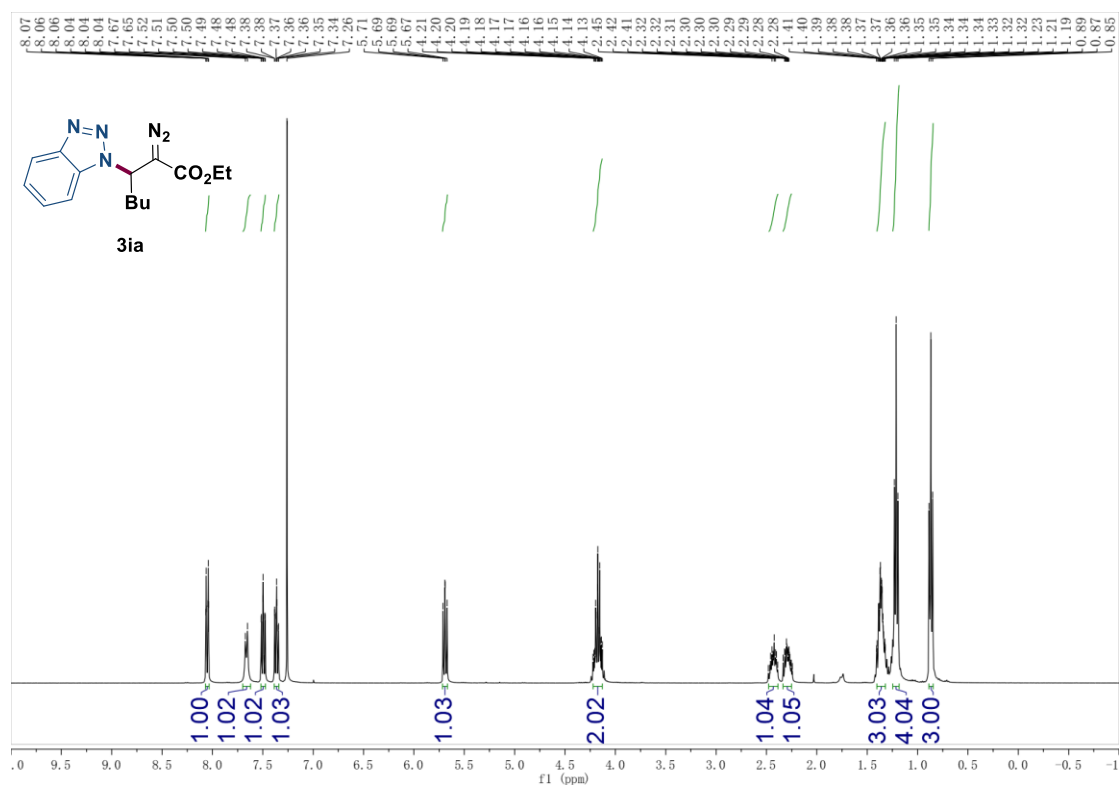

<sup>13</sup>C{<sup>1</sup>H} NMR (100 MHz, CDCl<sub>3</sub>) Spectrum of **3ia**

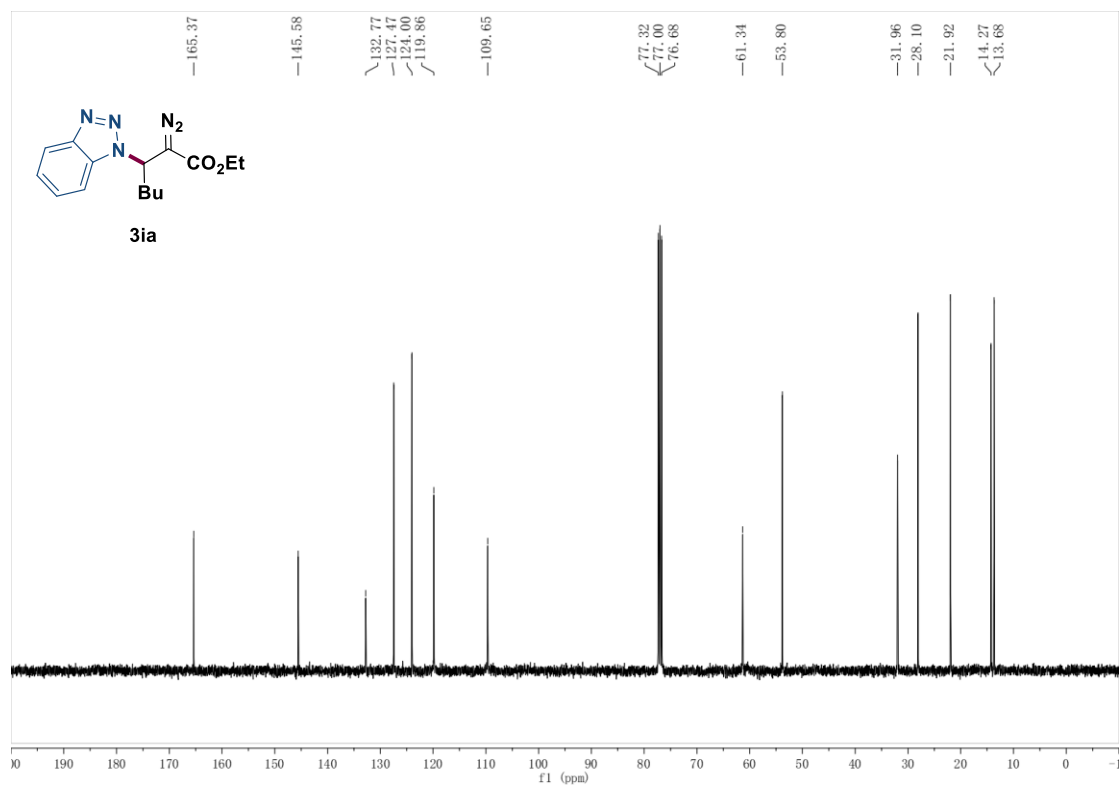

<sup>1</sup>H NMR (400 MHz, CDCl<sub>3</sub>) Spectrum of **3ja**

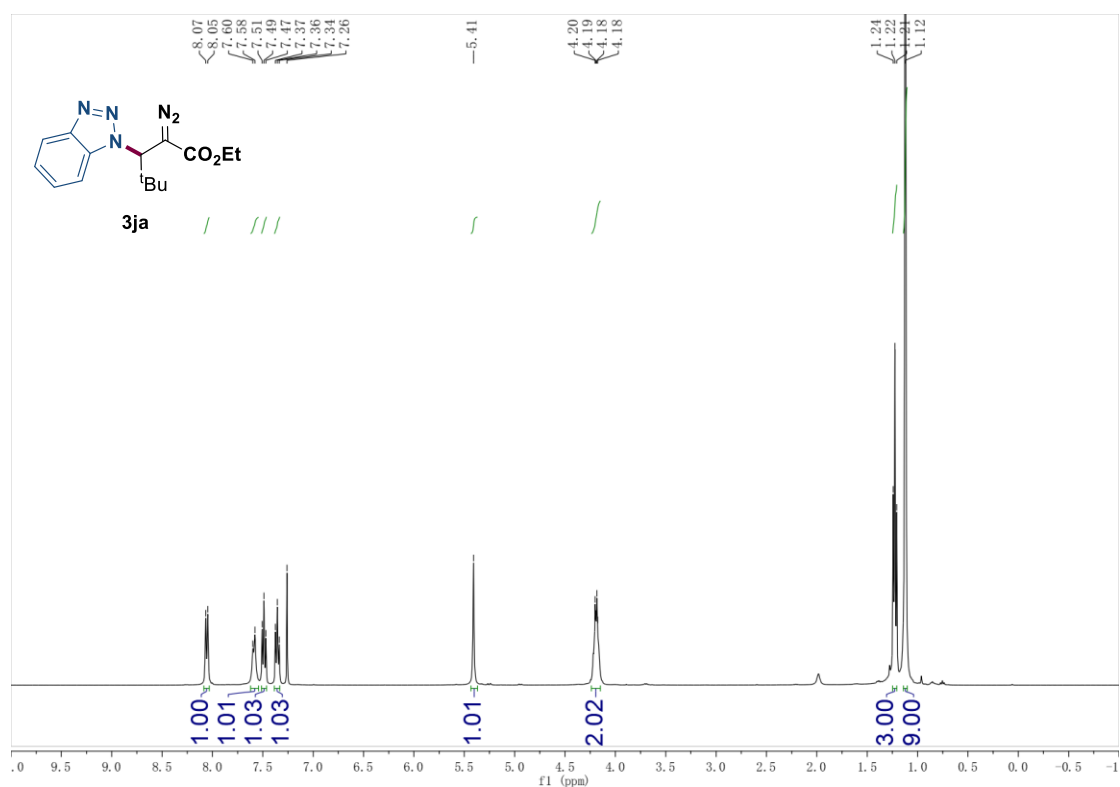

<sup>13</sup>C{<sup>1</sup>H} NMR (100 MHz, CDCl<sub>3</sub>) Spectrum of **3ja**

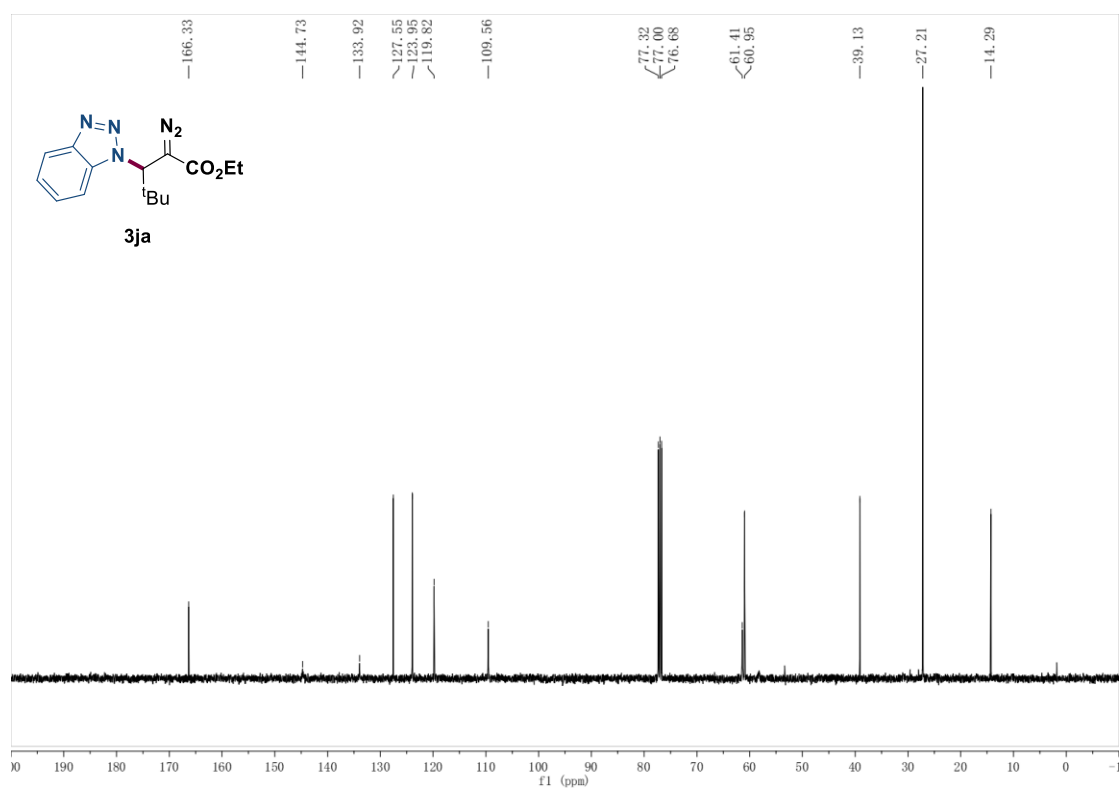

$^1\text{H}$  NMR (400 MHz,  $\text{CDCl}_3$ ) Spectrum of **3ka**

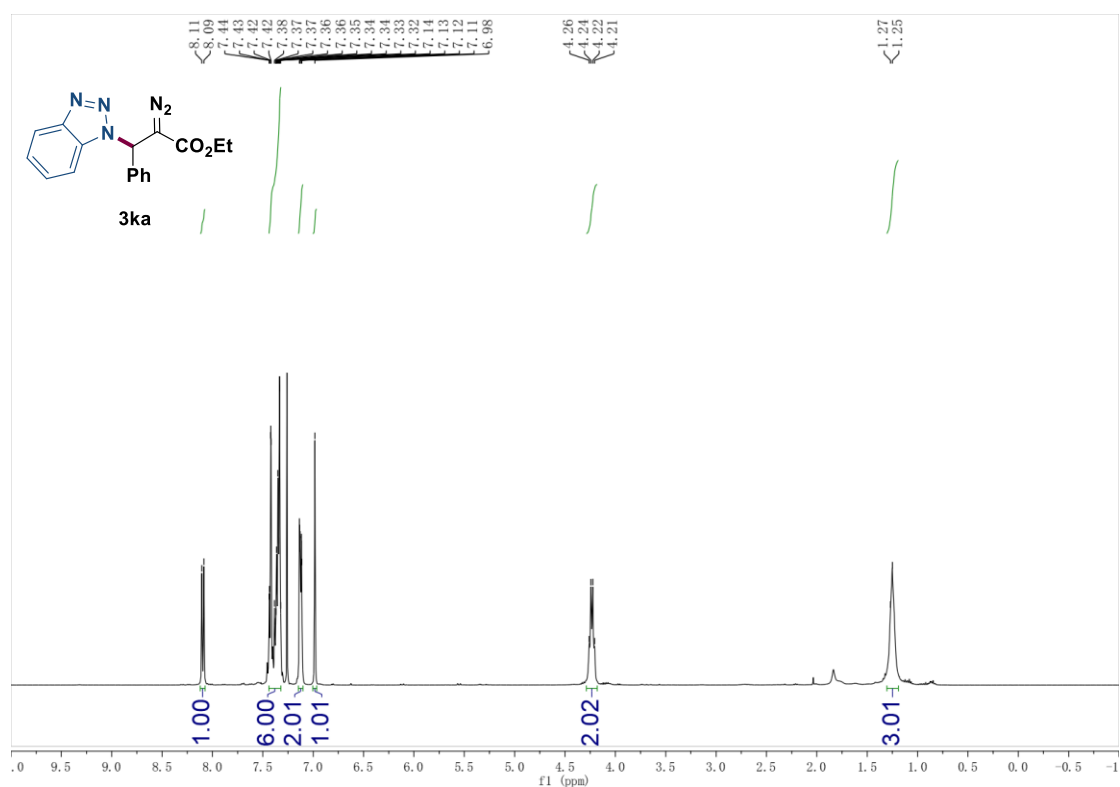

$^{13}\text{C}\{^1\text{H}\}$  NMR (100 MHz,  $\text{CDCl}_3$ ) Spectrum of **3ka**

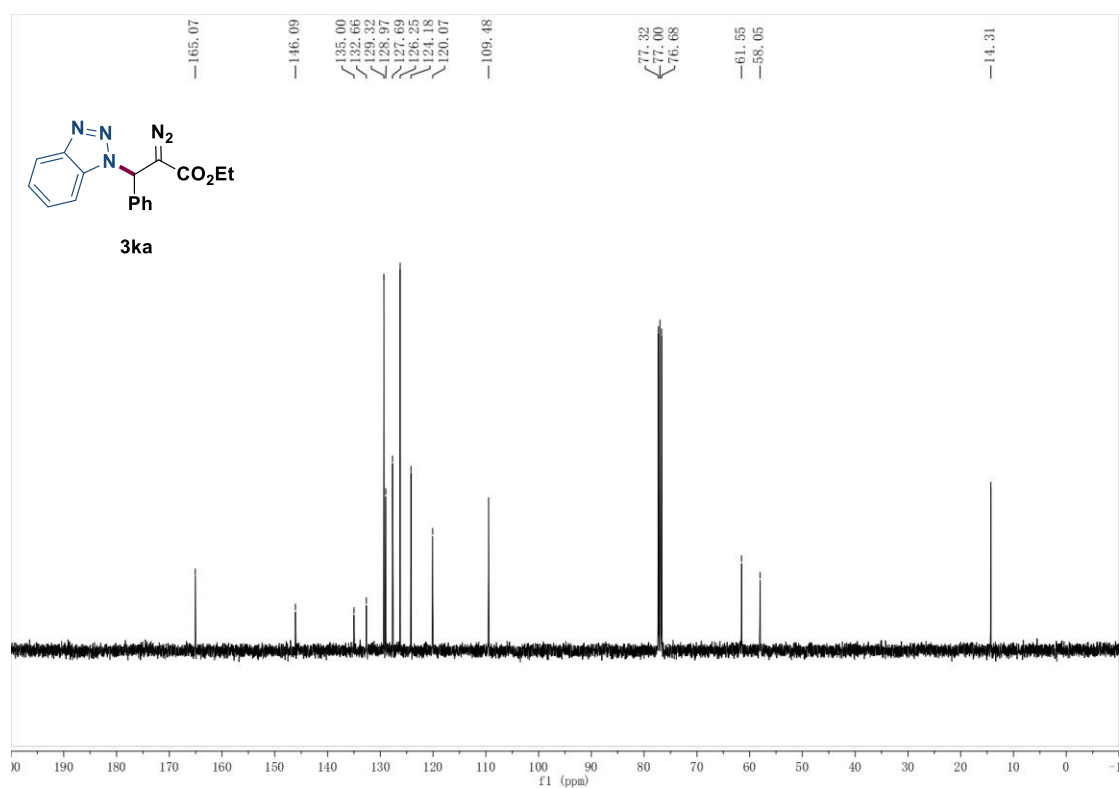

**3la**

Chemical structure of **3la** is shown above the spectrum. The structure is a benzimidazole derivative with a 1-phenyl-2-isopropyl-3-oxoprop-1-en-1-yl substituent.

<sup>13</sup>C NMR spectrum (ppm) showing peaks at:

- 165.59
- 145.99
- 135.20
- 133.03
- 132.54
- 128.92
- 128.22
- 127.97
- 126.94
- 123.60
- 119.89
- 113.16
- 109.93
- 77.32
- 77.05
- 76.68
- 64.05
- 61.26
- 40.38
- 24.56
- 22.70
- 21.65
- 14.23

<sup>1</sup>H NMR (400 MHz, CDCl<sub>3</sub>) Spectrum of **3ma**

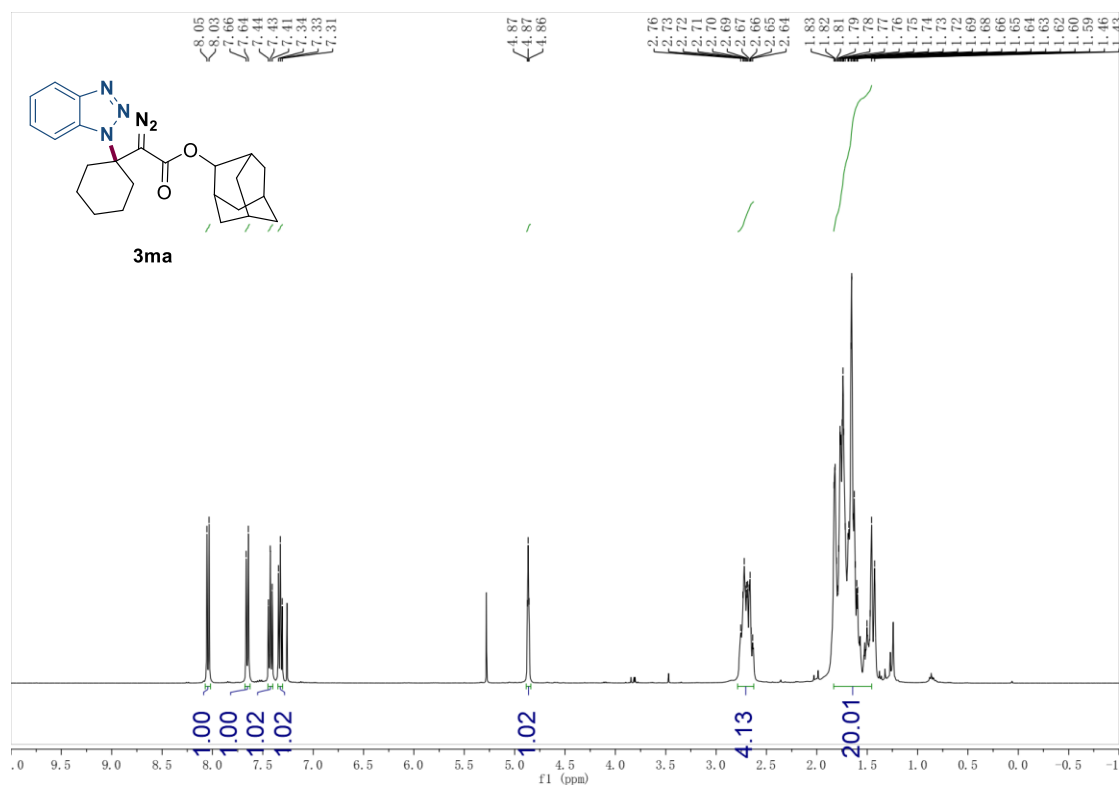

<sup>13</sup>C{<sup>1</sup>H} NMR (100 MHz, CDCl<sub>3</sub>) Spectrum of **3ma**

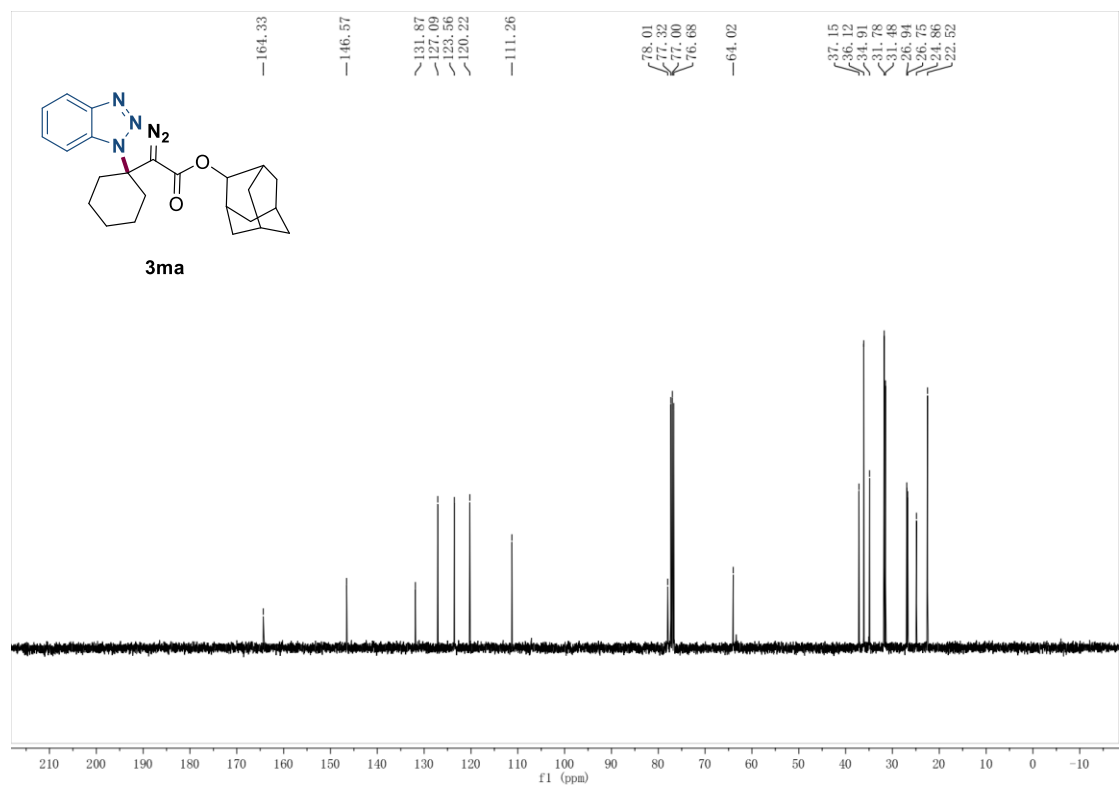

<sup>1</sup>H NMR (400 MHz, CDCl<sub>3</sub>) Spectrum of **3na**

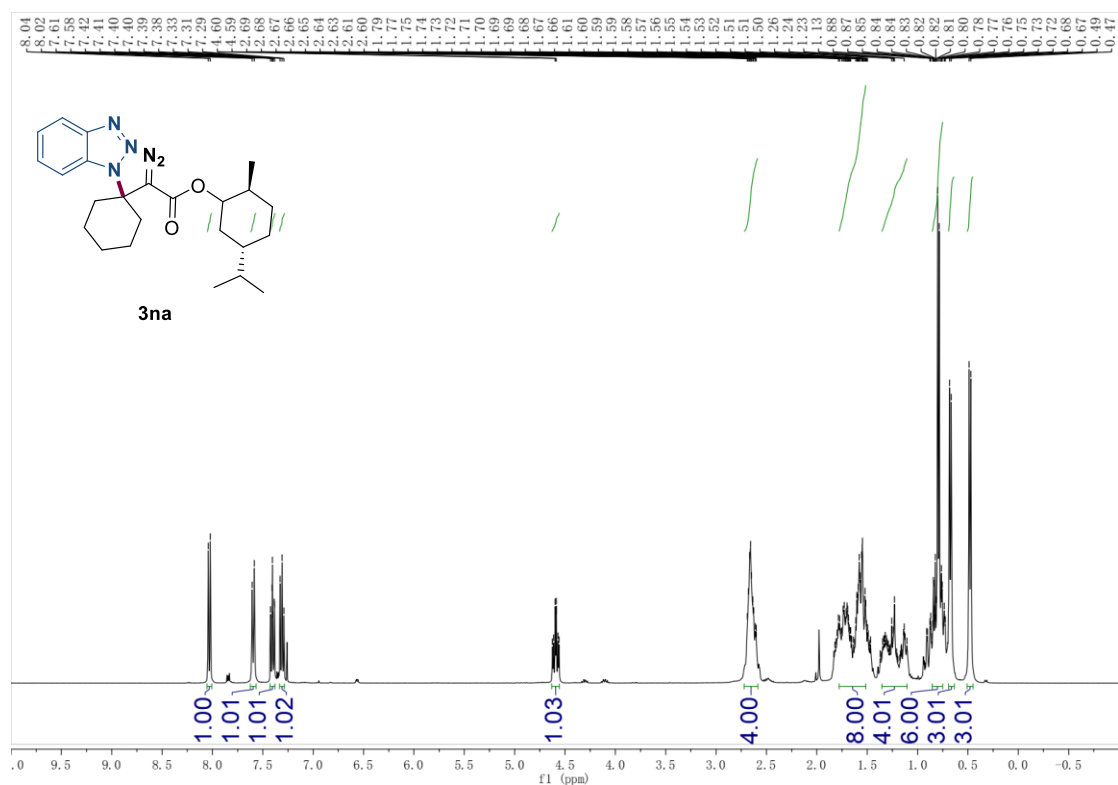

<sup>13</sup>C{<sup>1</sup>H} NMR (100 MHz, CDCl<sub>3</sub>) Spectrum of **3na**

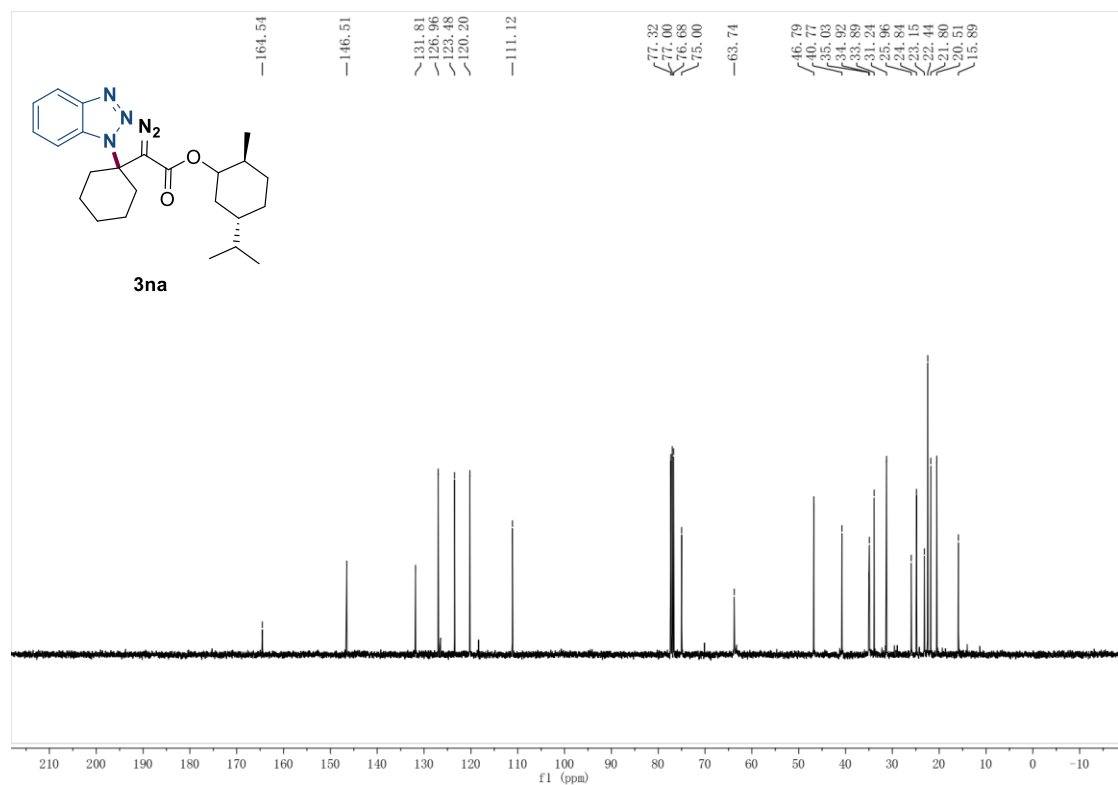

$^1\text{H}$  NMR (400 MHz,  $\text{CDCl}_3$ ) Spectrum of **3oa**

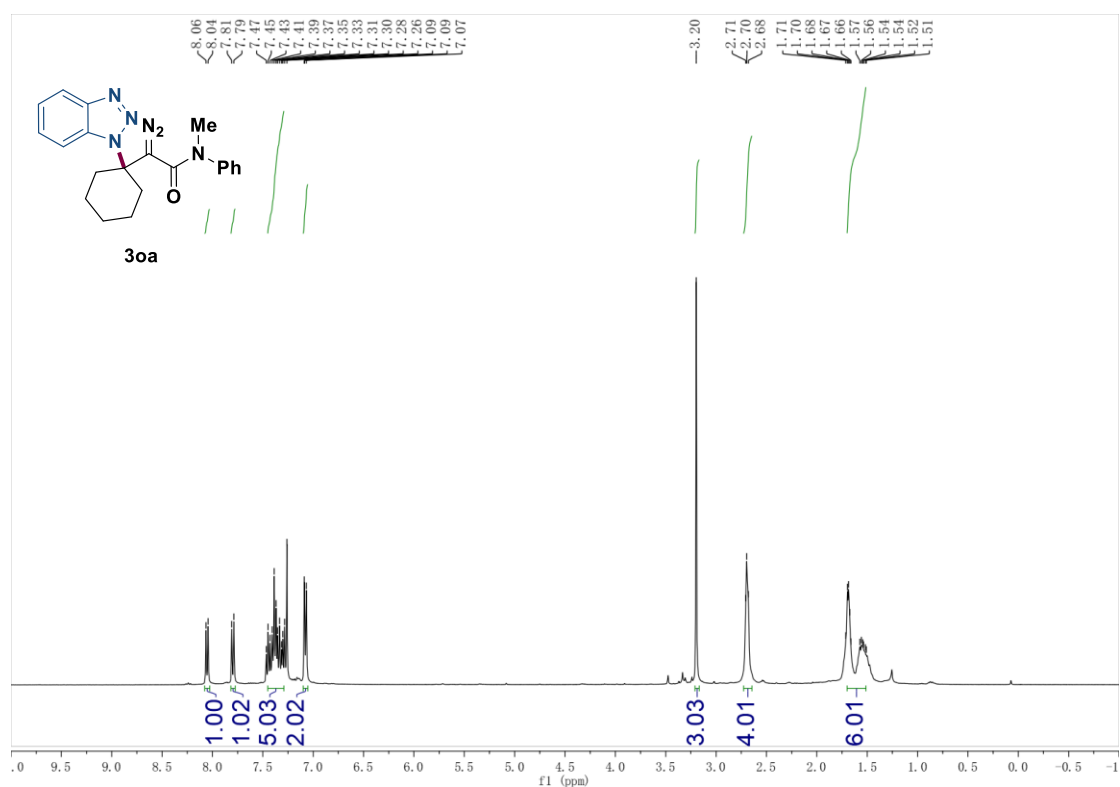

$^{13}\text{C}\{^1\text{H}\}$  NMR (100 MHz,  $\text{CDCl}_3$ ) Spectrum of **3oa**

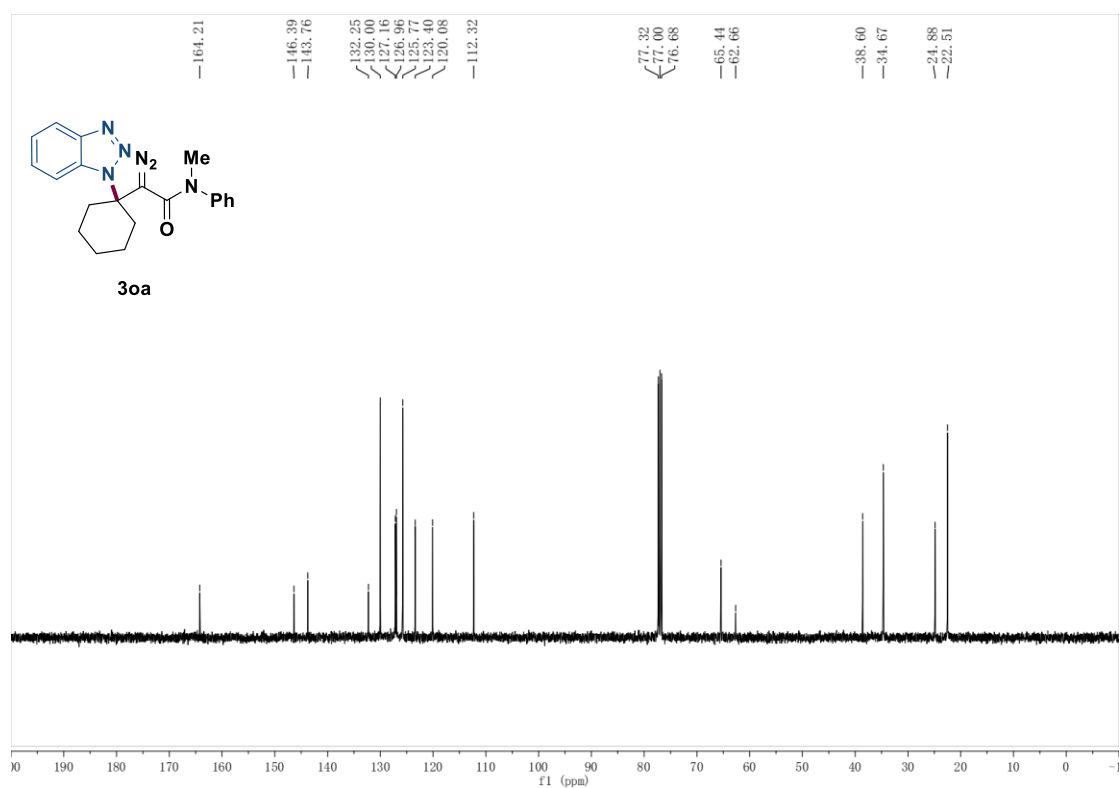

<sup>1</sup>H NMR (400 MHz, CDCl<sub>3</sub>) Spectrum of **3ab**

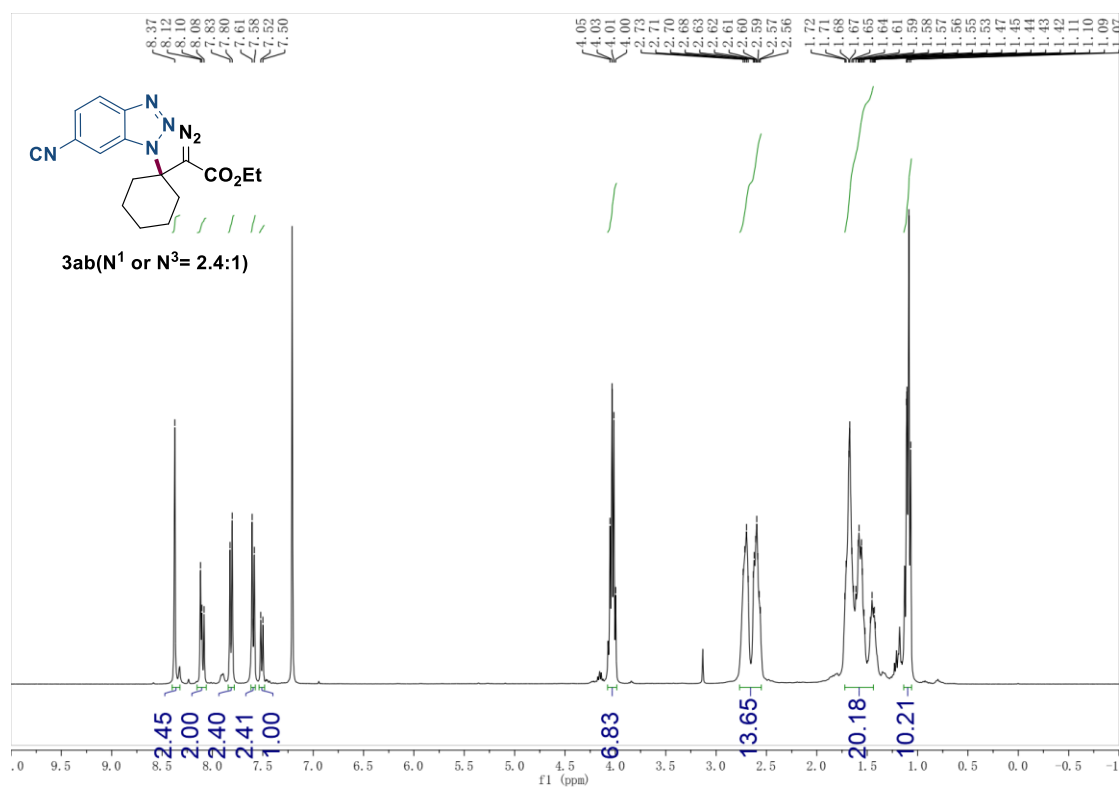

<sup>13</sup>C{<sup>1</sup>H} NMR (100 MHz, CDCl<sub>3</sub>) Spectrum of **3ab**

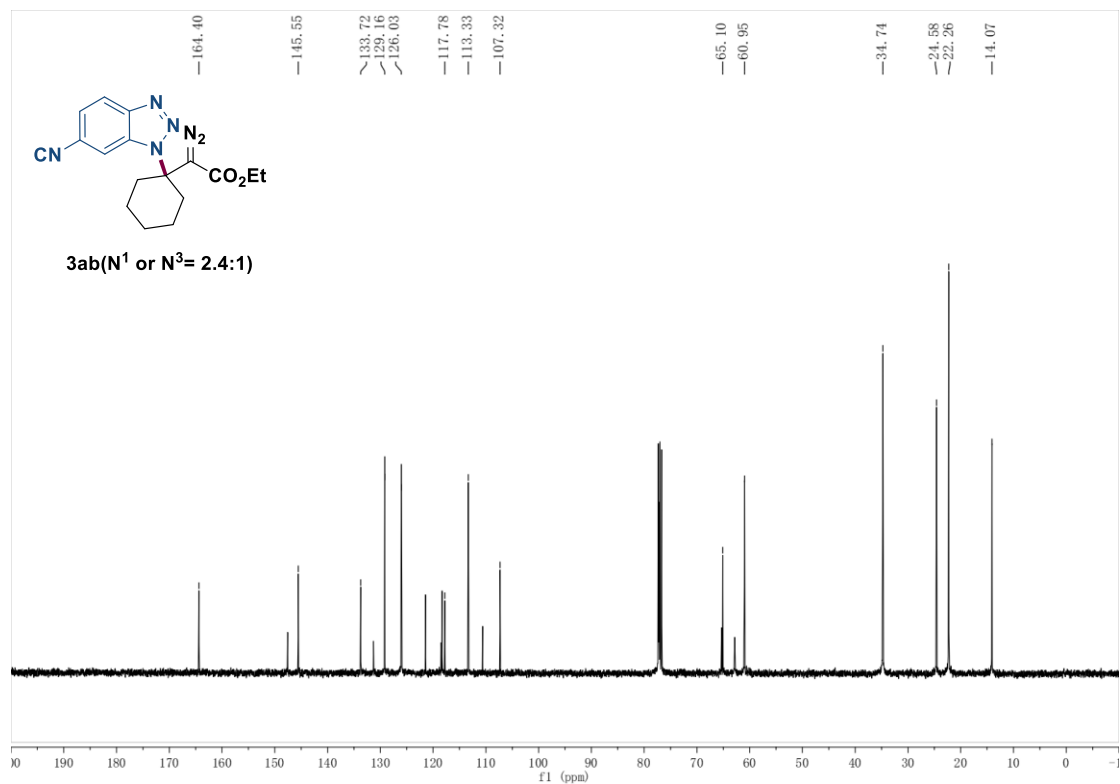



<sup>1</sup>H NMR (400 MHz, CDCl<sub>3</sub>) Spectrum of **3ac**

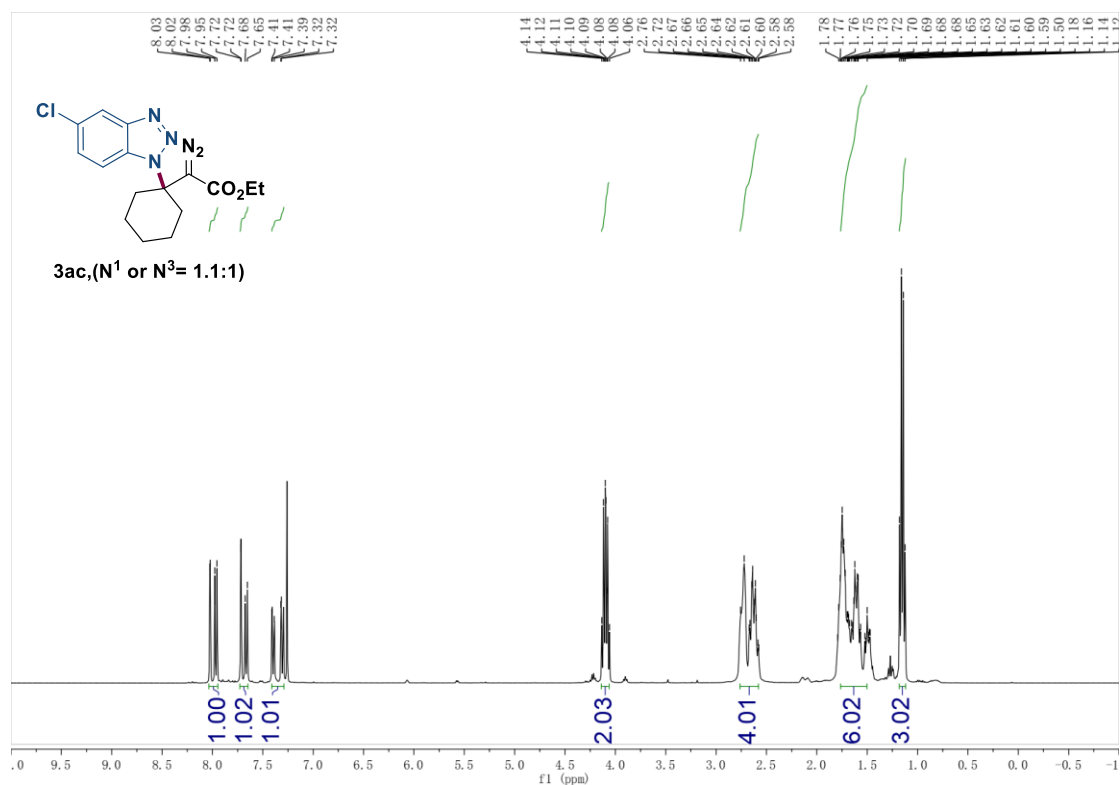

<sup>13</sup>C{<sup>1</sup>H} NMR (100 MHz, CDCl<sub>3</sub>) Spectrum of **3ac**

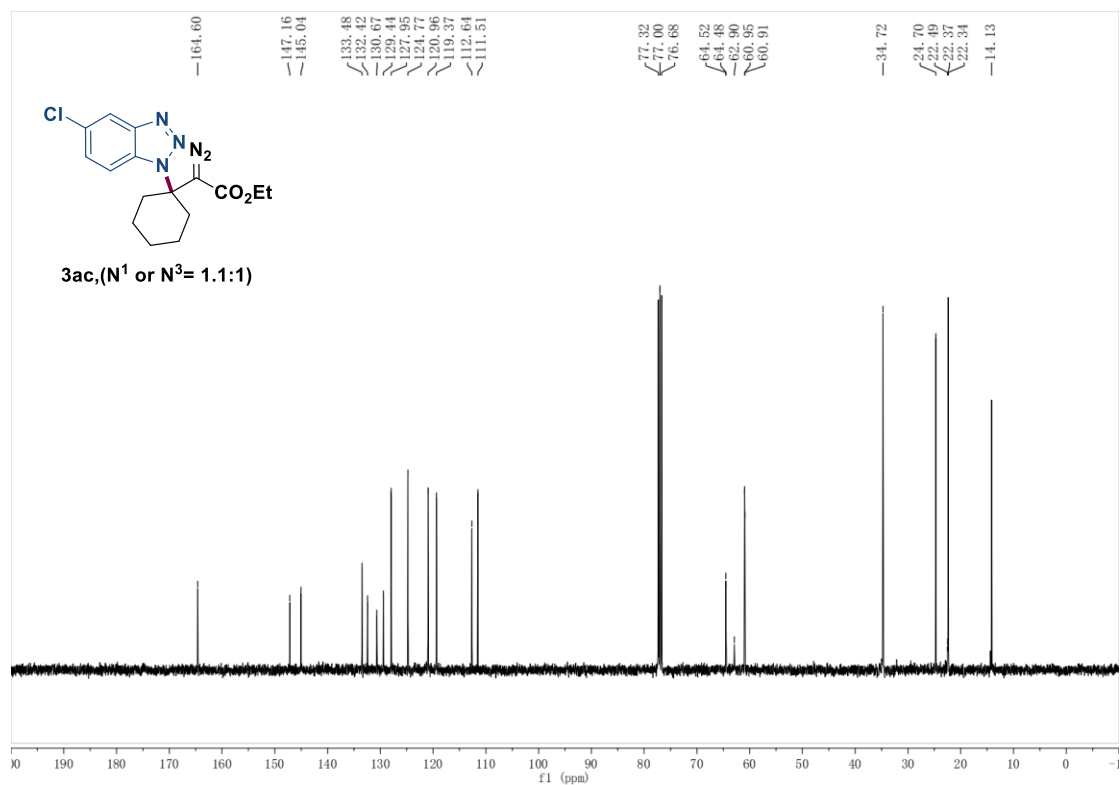

<sup>1</sup>H NMR (400 MHz, CDCl<sub>3</sub>) Spectrum of **3ad**

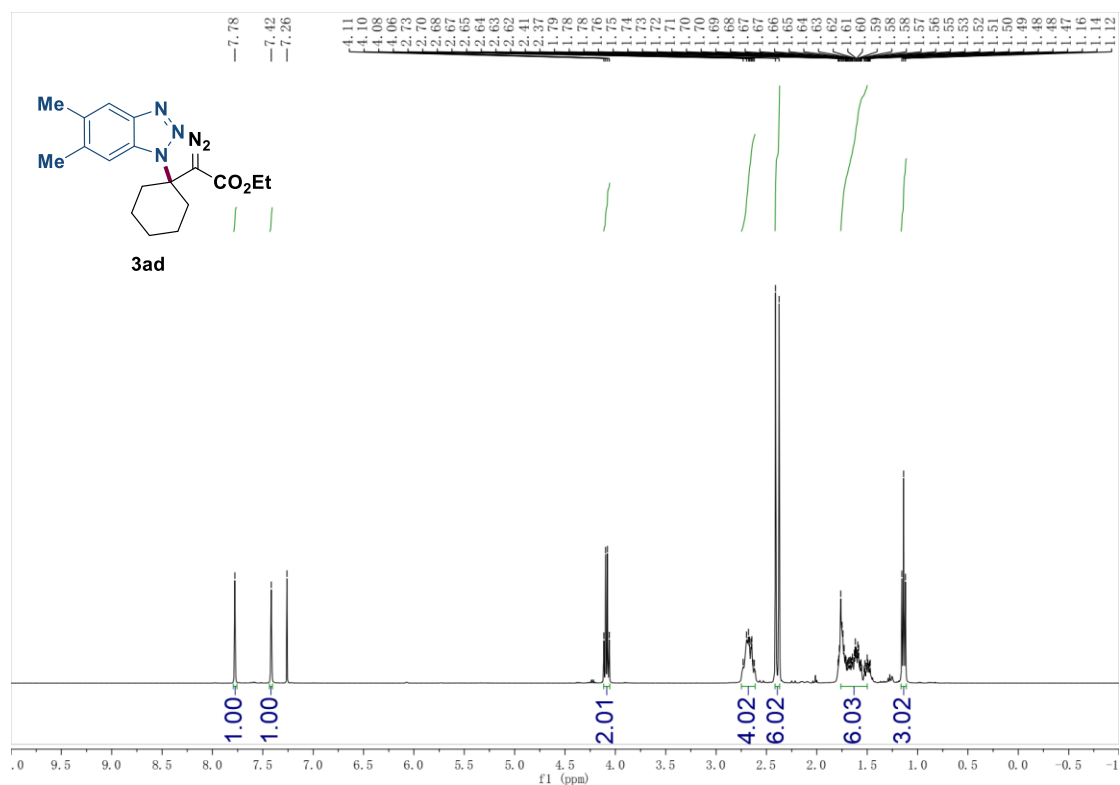

<sup>13</sup>C{<sup>1</sup>H} NMR (100 MHz, CDCl<sub>3</sub>) Spectrum of **3ad**

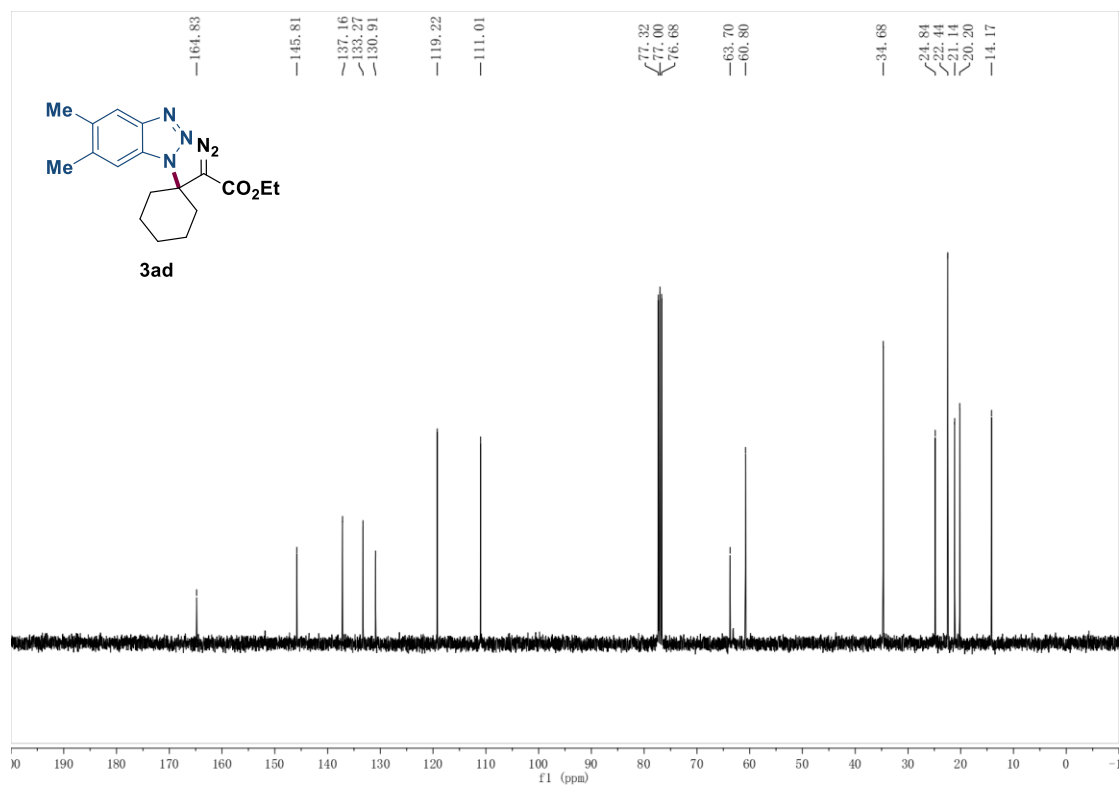

<sup>1</sup>H NMR (400 MHz, CDCl<sub>3</sub>) Spectrum of **3ae**

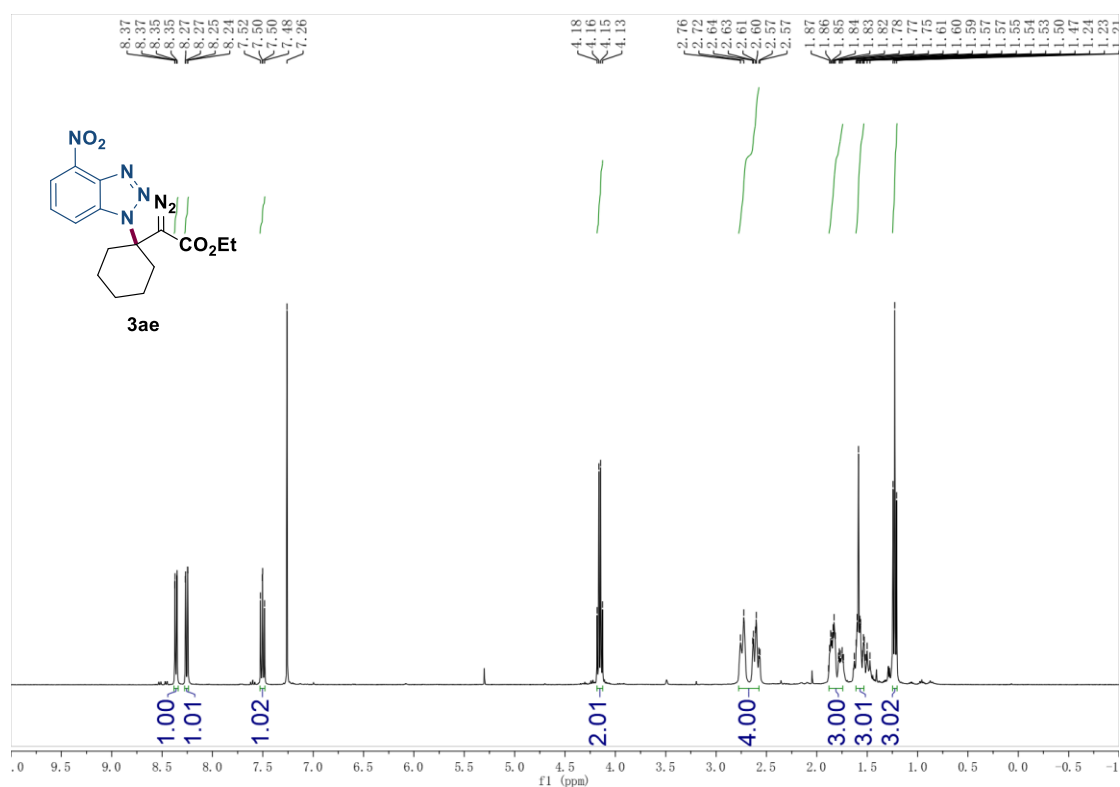

<sup>13</sup>C{<sup>1</sup>H} NMR (100 MHz, CDCl<sub>3</sub>) Spectrum of **3ae**

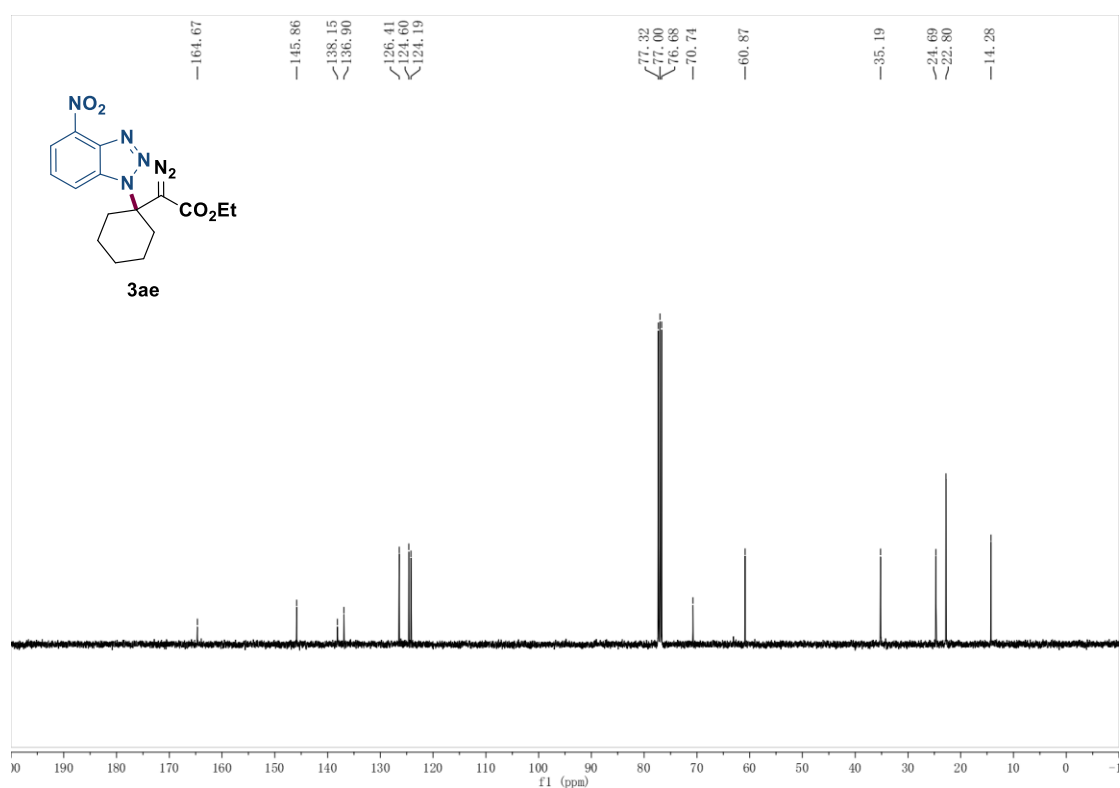

<sup>1</sup>H NMR (400 MHz, CDCl<sub>3</sub>) Spectrum of **3af**

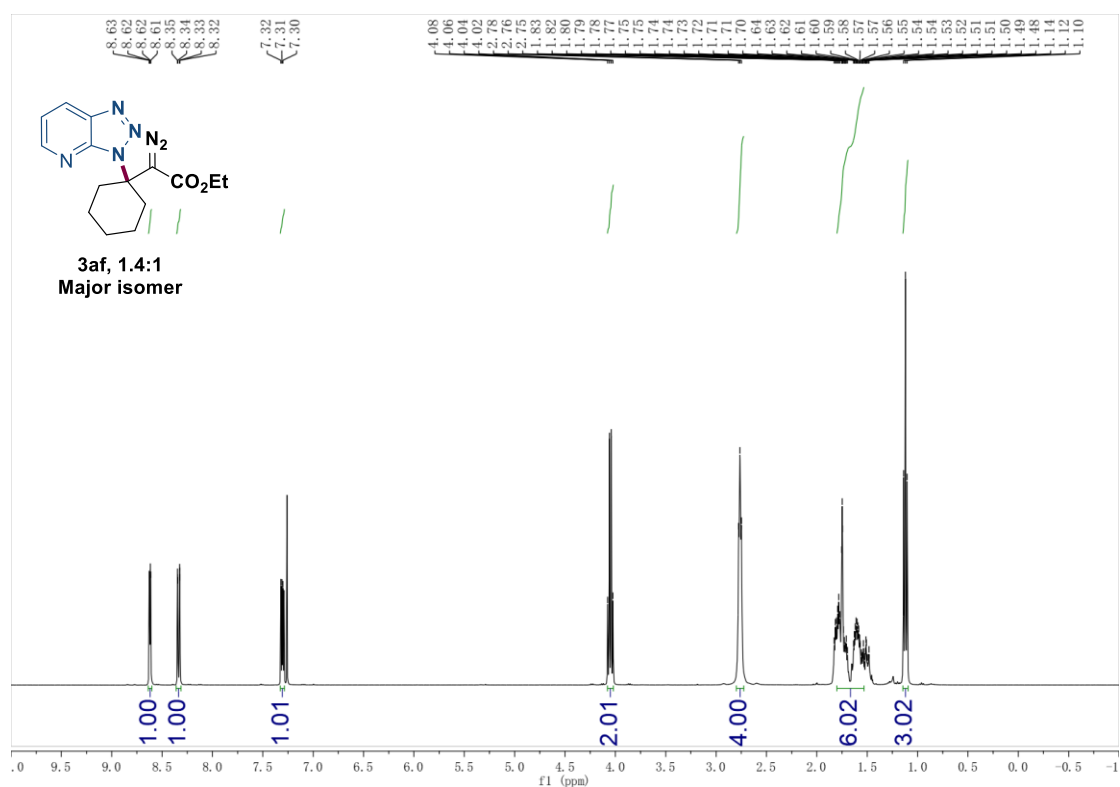

<sup>13</sup>C{<sup>1</sup>H} NMR (100 MHz, CDCl<sub>3</sub>) Spectrum of **3af**

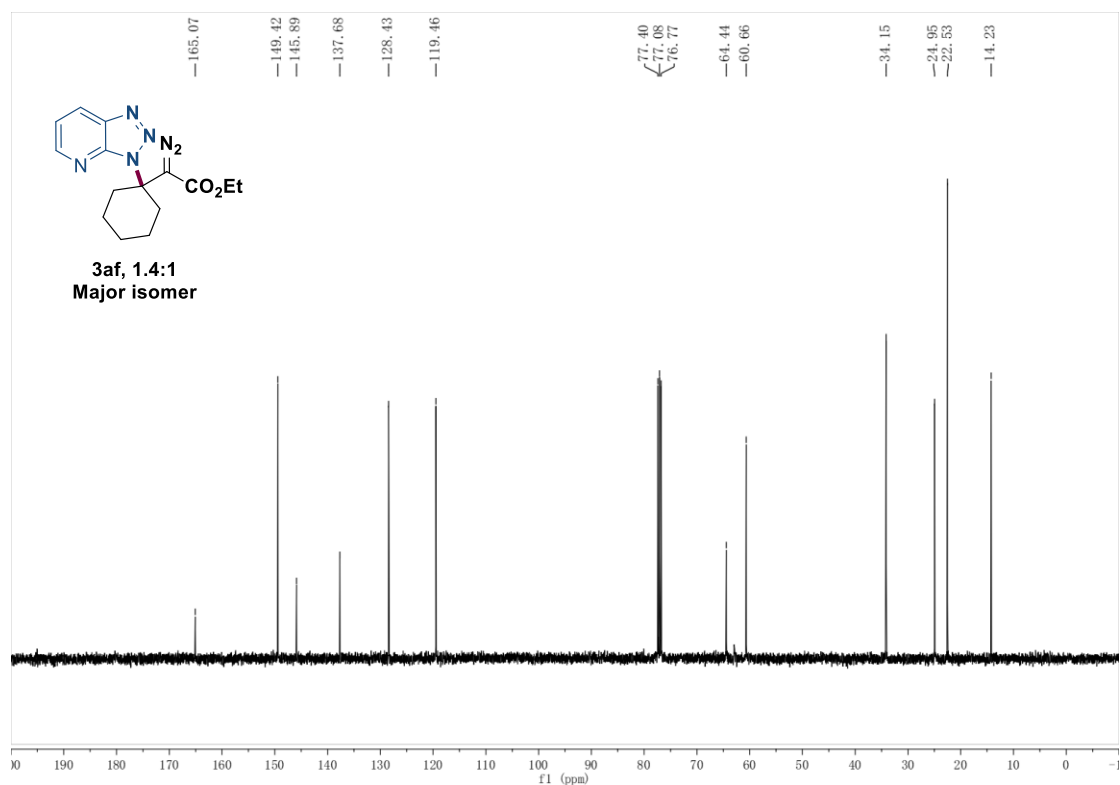

<sup>1</sup>H NMR (400 MHz, CDCl<sub>3</sub>) Spectrum of **3af**

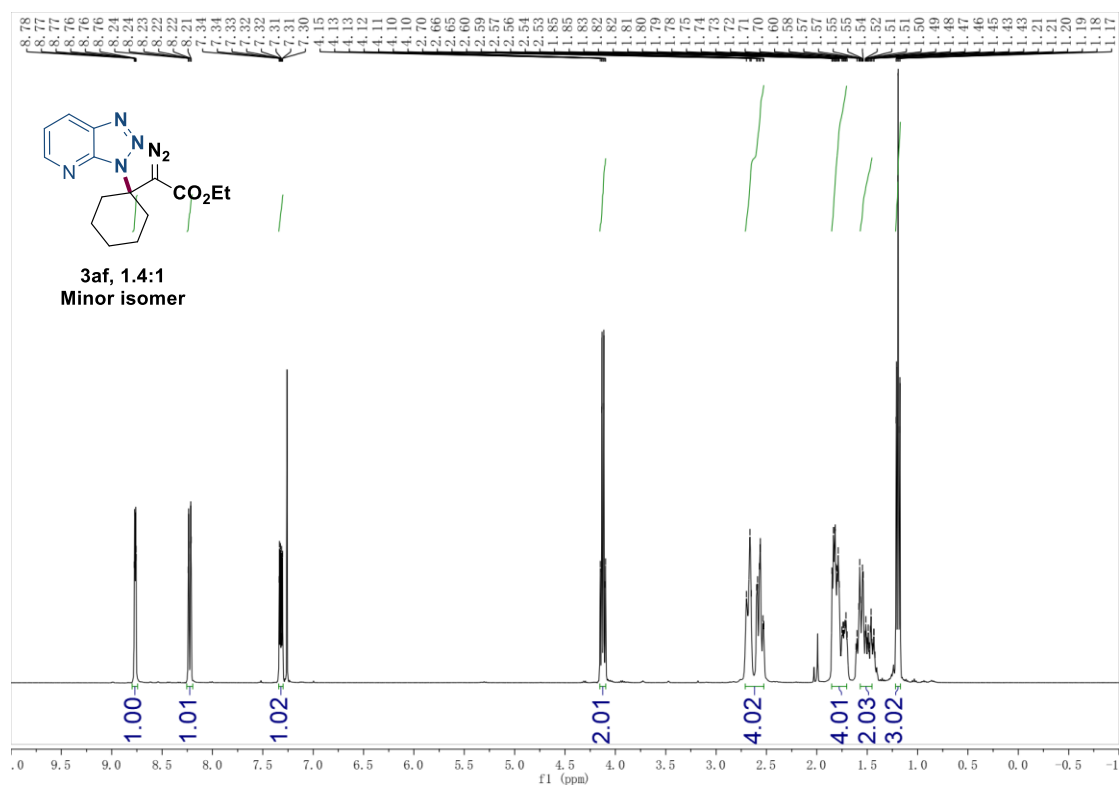

<sup>13</sup>C{<sup>1</sup>H} NMR (100 MHz, CDCl<sub>3</sub>) Spectrum of **3af**

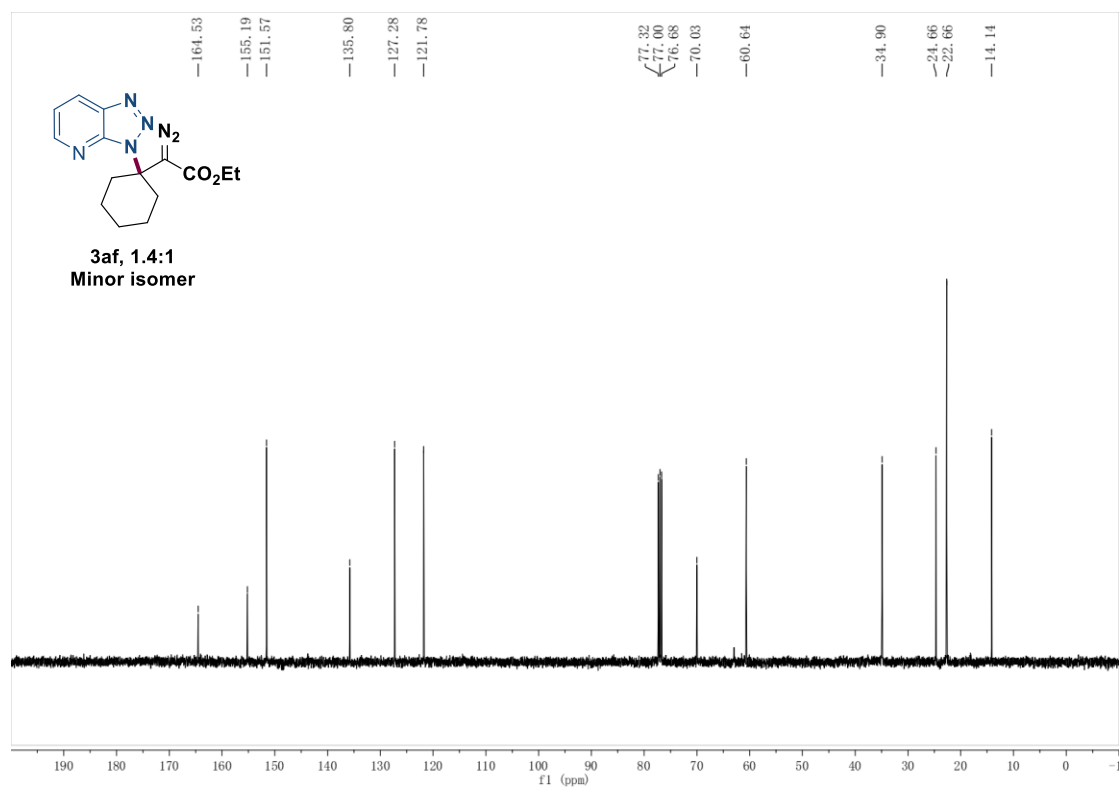

<sup>1</sup>H NMR (400 MHz, CDCl<sub>3</sub>) Spectrum of **3ag**

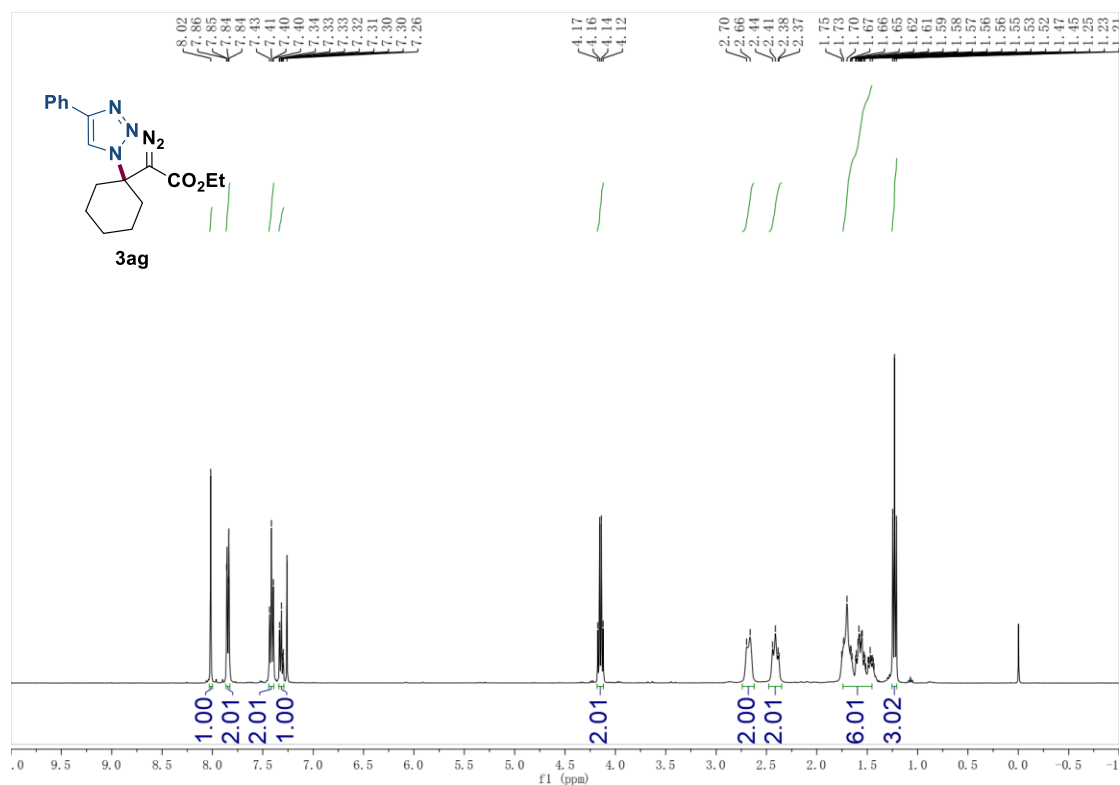

<sup>13</sup>C{<sup>1</sup>H} NMR (100 MHz, CDCl<sub>3</sub>) Spectrum of **3ag**

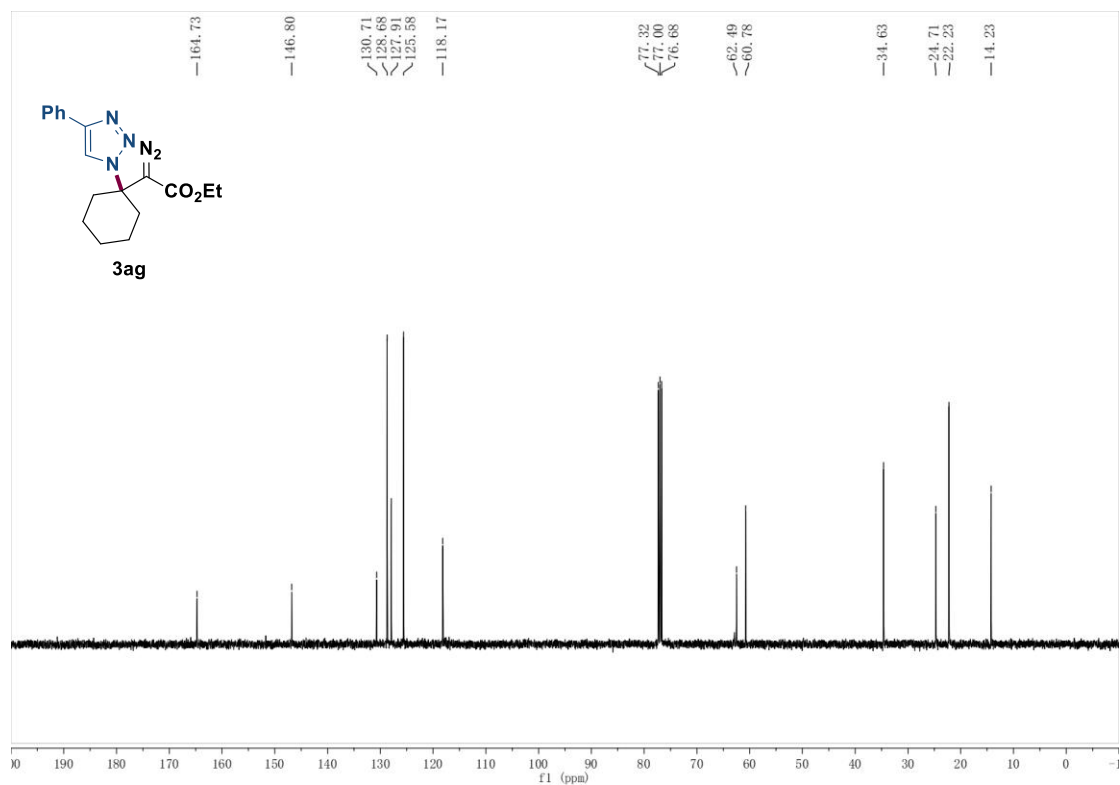

<sup>1</sup>H NMR (400 MHz, CDCl<sub>3</sub>) Spectrum of **3ah**

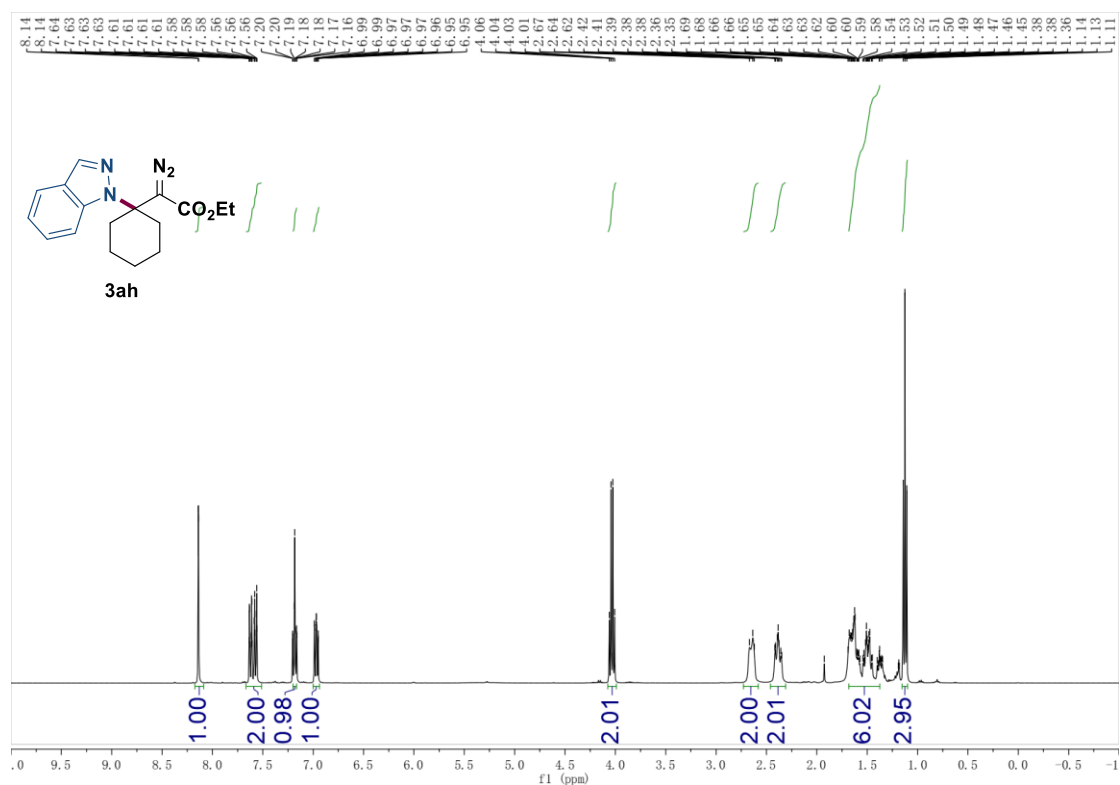

<sup>13</sup>C{<sup>1</sup>H} NMR (100 MHz, CDCl<sub>3</sub>) Spectrum of **3ah**

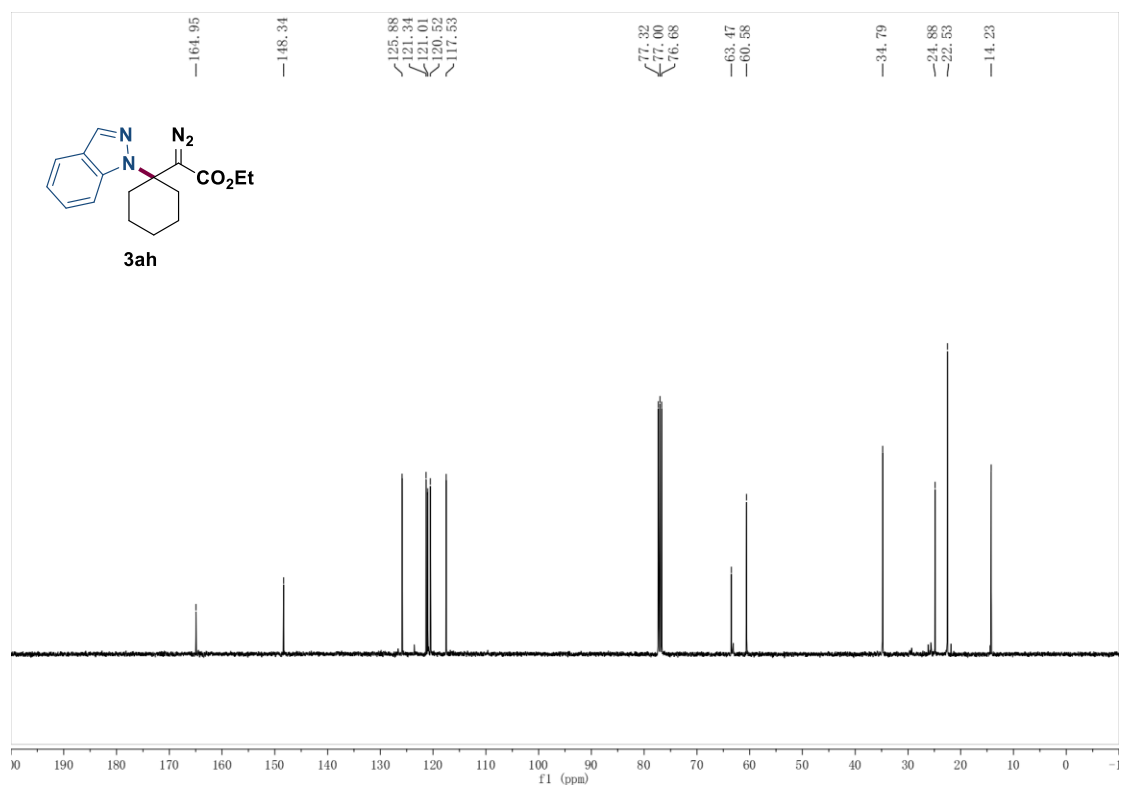

<sup>1</sup>H NMR (400 MHz, CDCl<sub>3</sub>) Spectrum of **3ai**

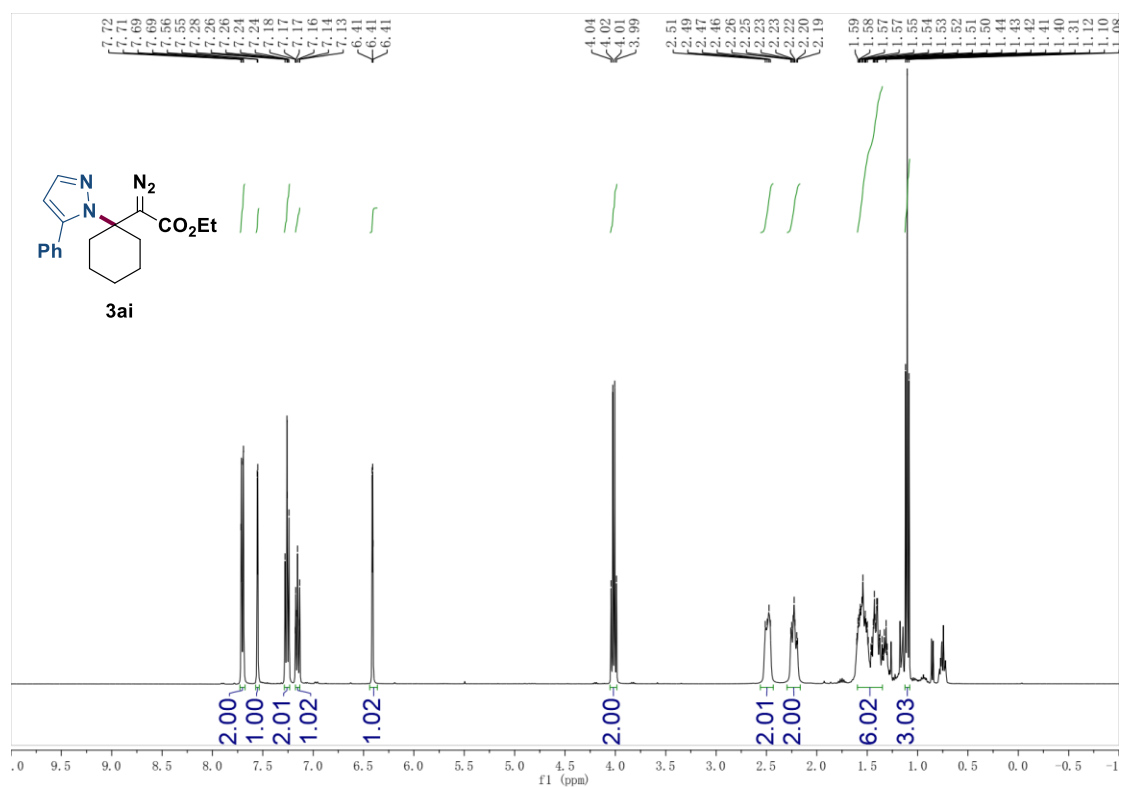

<sup>13</sup>C{<sup>1</sup>H} NMR (100 MHz, CDCl<sub>3</sub>) Spectrum of **3ai**

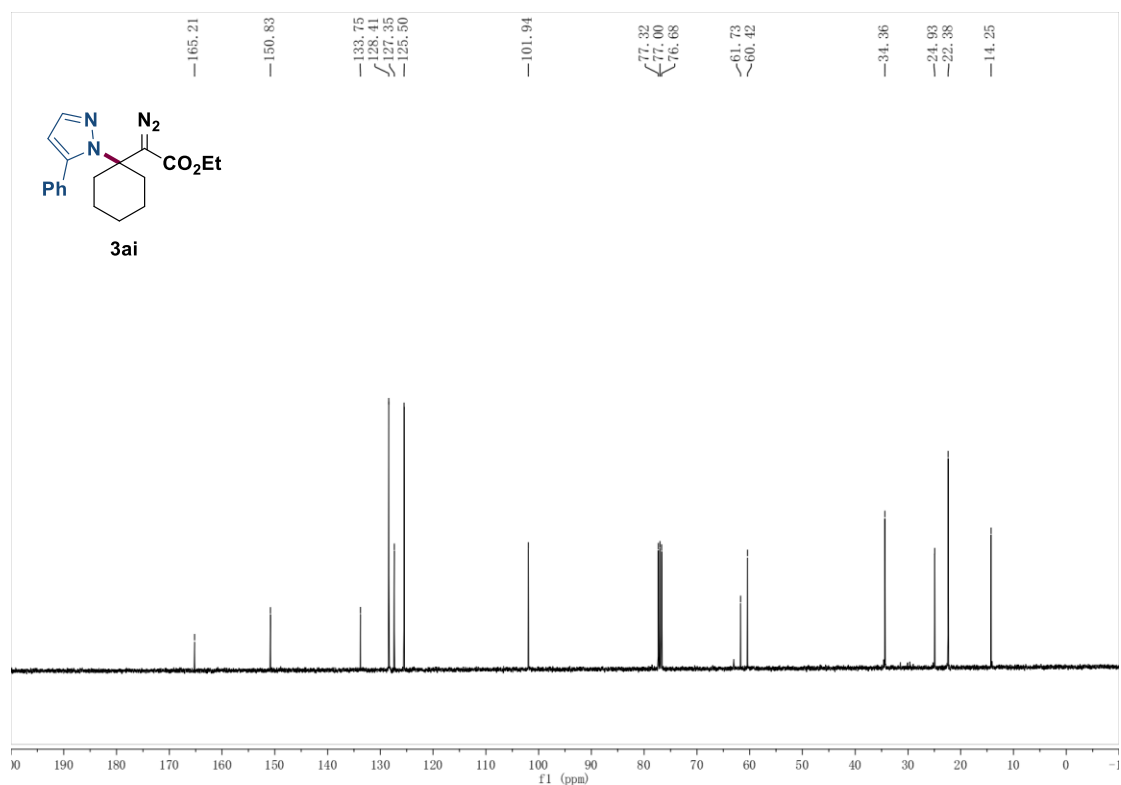



<sup>1</sup>H NMR (400 MHz, CDCl<sub>3</sub>) Spectrum of **4aa**

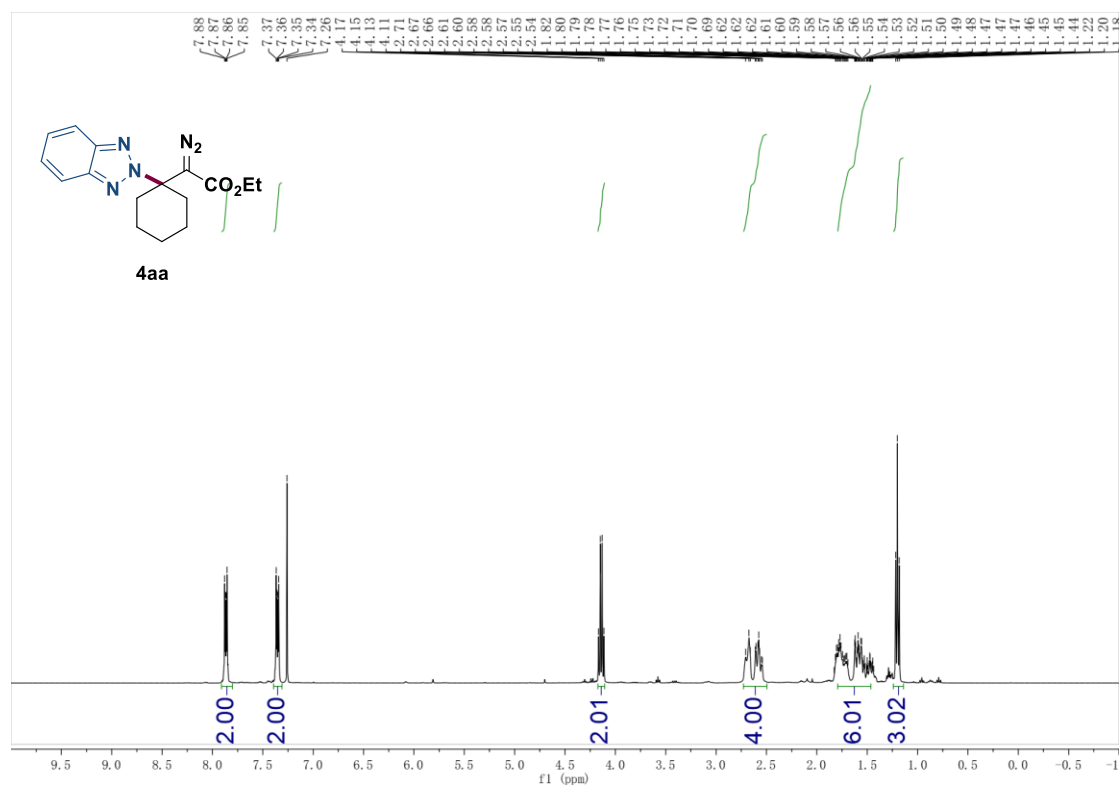

<sup>13</sup>C{<sup>1</sup>H} NMR (100 MHz, CDCl<sub>3</sub>) Spectrum of **4aa**

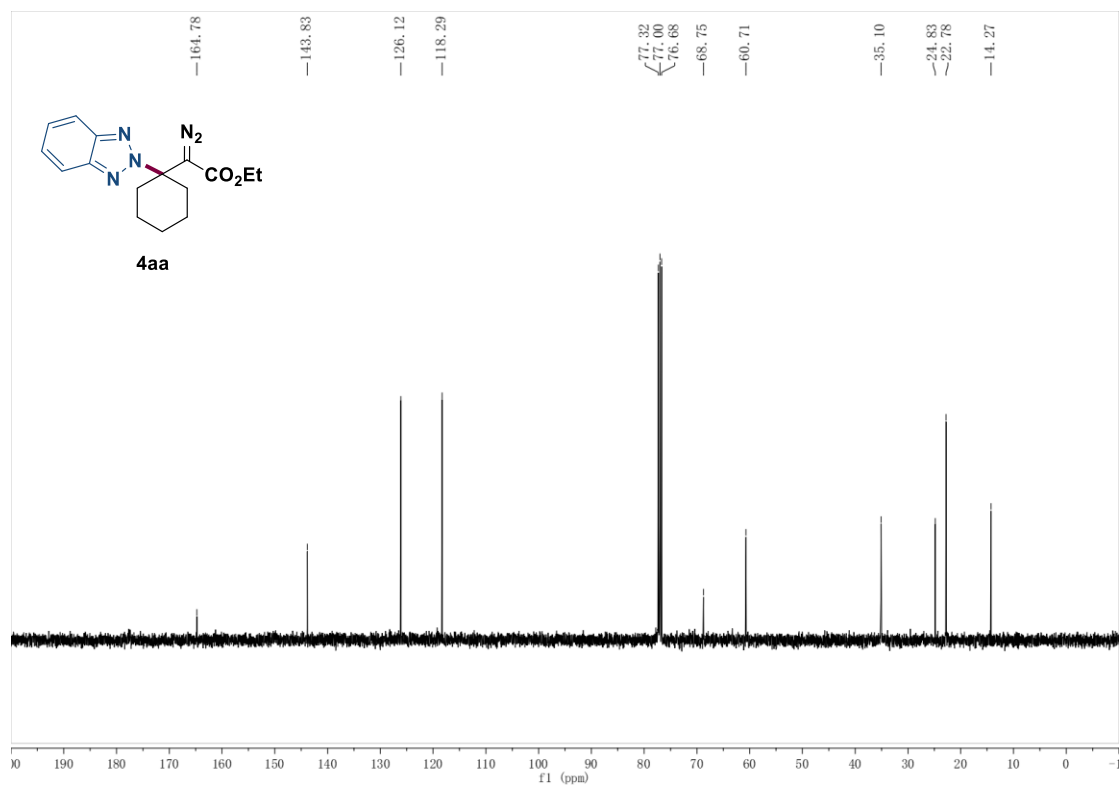

<sup>1</sup>H NMR (400 MHz, CDCl<sub>3</sub>) Spectrum of **4ba**

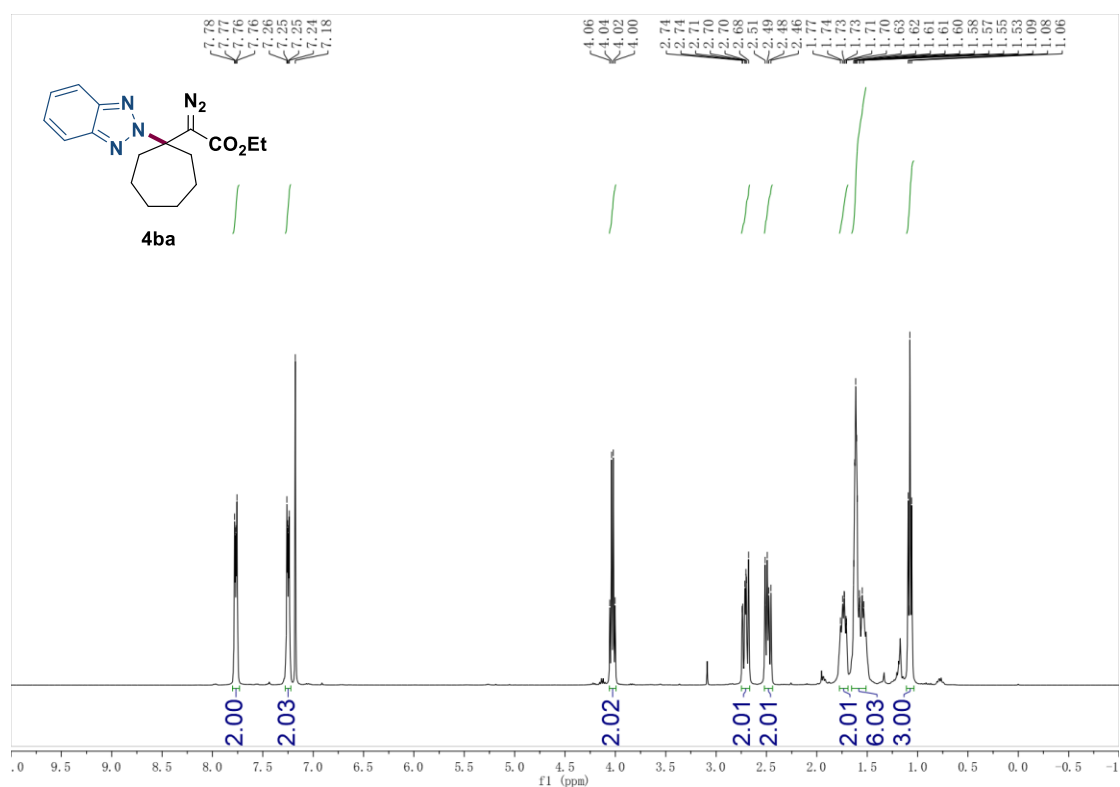

<sup>13</sup>C{<sup>1</sup>H} NMR (100 MHz, CDCl<sub>3</sub>) Spectrum of **4ba**

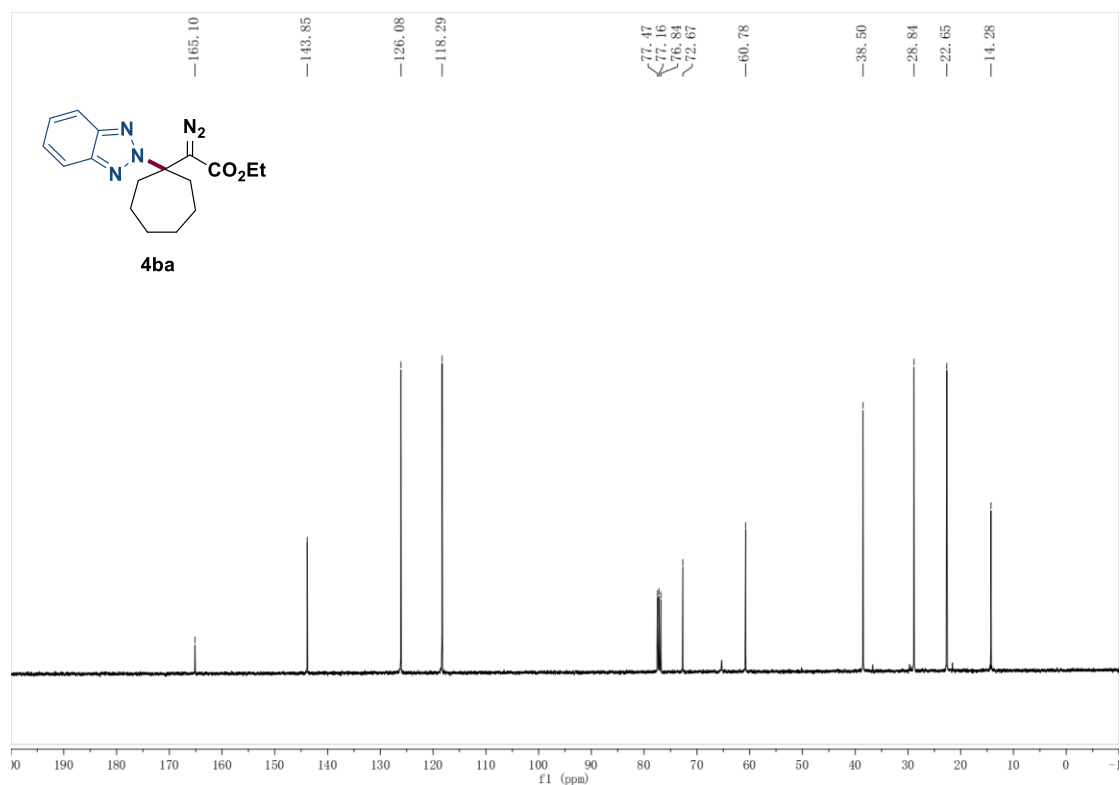

$^1\text{H}$  NMR (400 MHz,  $\text{CDCl}_3$ ) Spectrum of **4da**

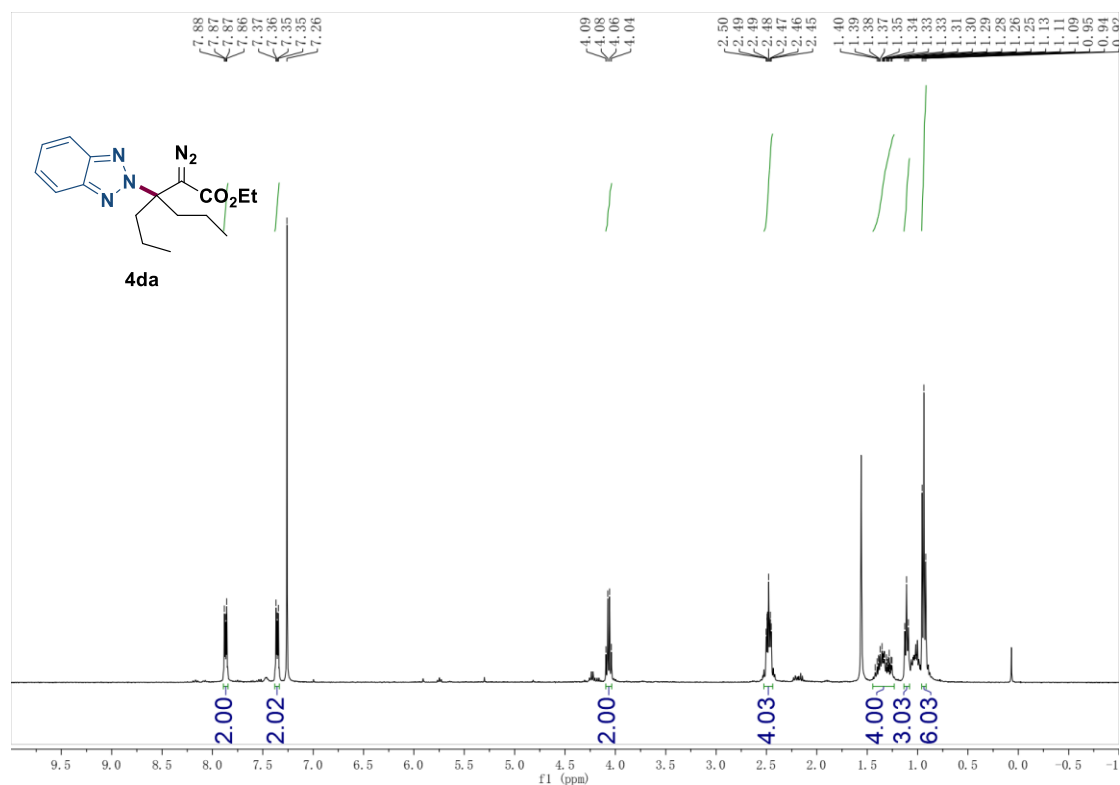

$^{13}\text{C}\{^1\text{H}\}$  NMR (100 MHz,  $\text{CDCl}_3$ ) Spectrum of **4da**

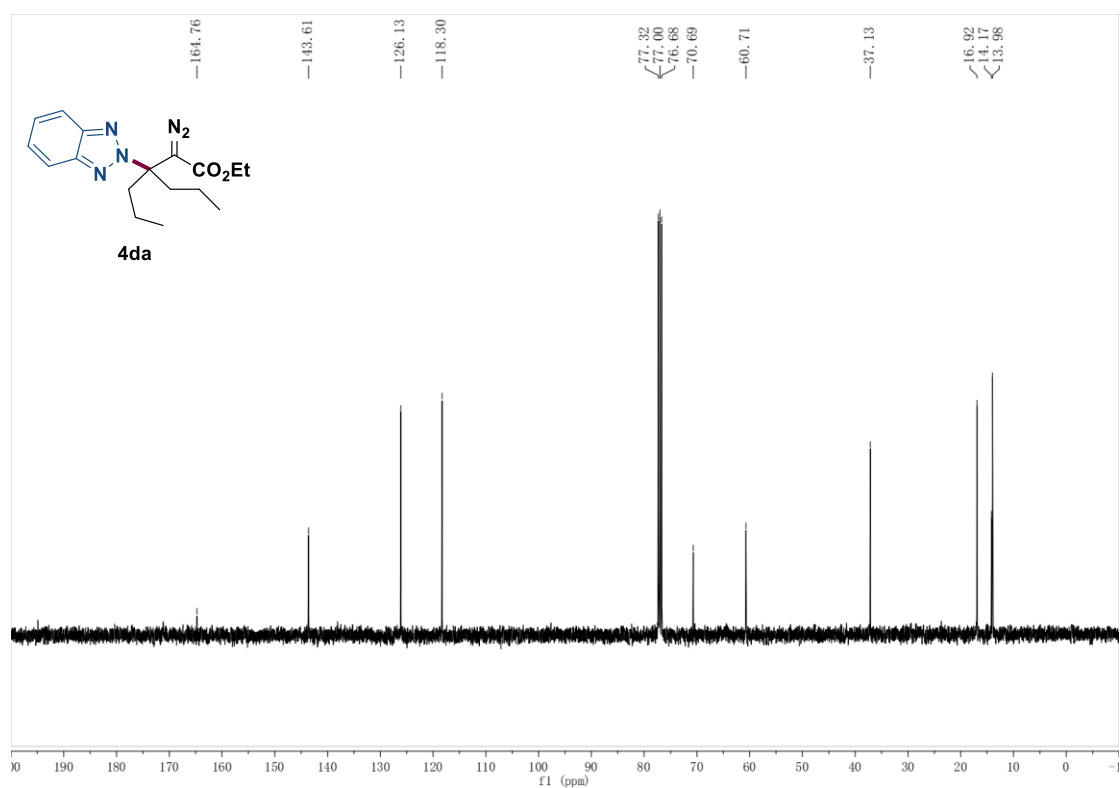

<sup>1</sup>H NMR (400 MHz, CDCl<sub>3</sub>) Spectrum of **4ea**

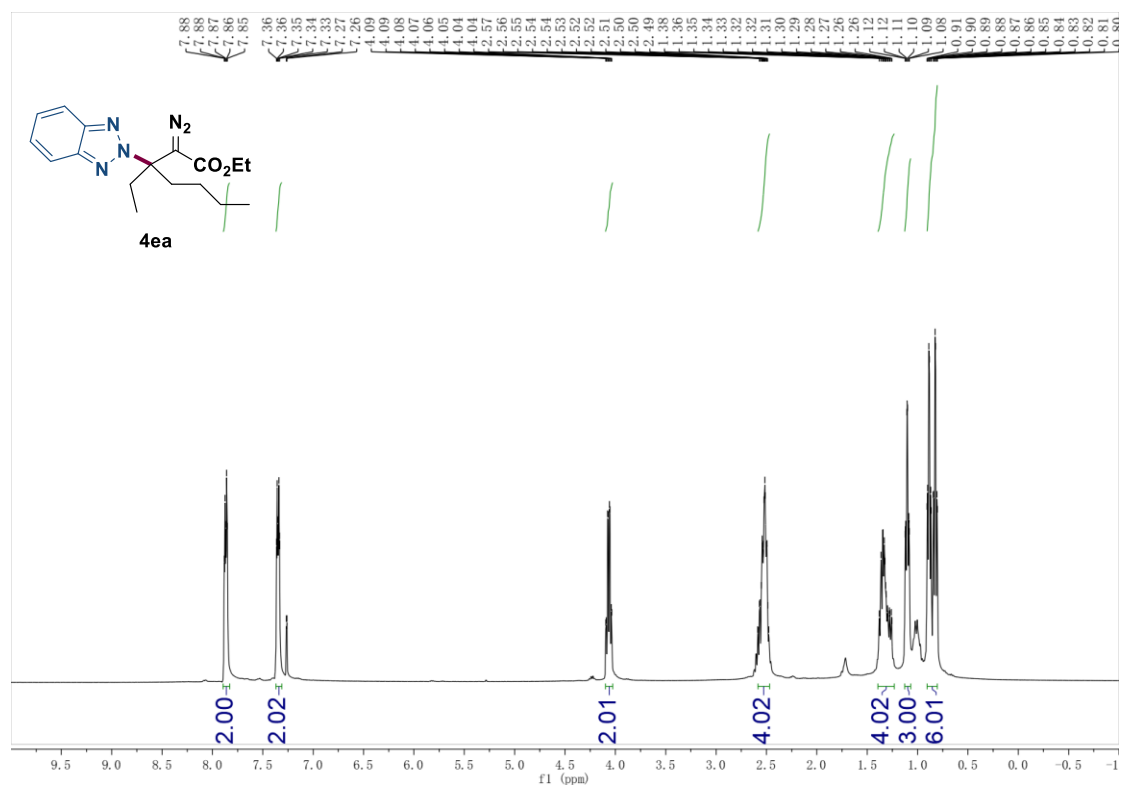

<sup>13</sup>C{<sup>1</sup>H} NMR (100 MHz, CDCl<sub>3</sub>) Spectrum of **4ea**

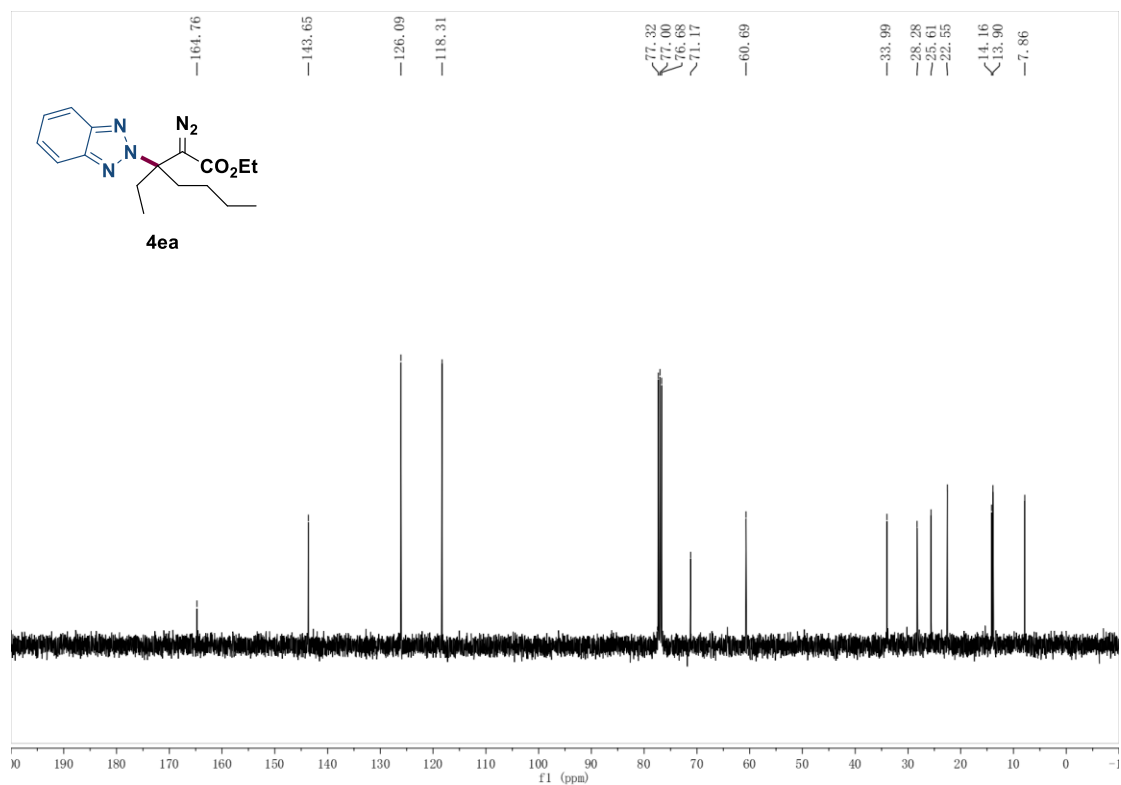

**4fa**

C1CC1[C@H](C#N)C(=O)OCC

<sup>1</sup>H NMR spectrum (CDCl<sub>3</sub>) of compound **4fa**. The spectrum shows peaks at 7.88, 7.87, 7.86, 7.39, 7.38, 7.37, 5.21, 4.21, 4.20, 4.17, 4.16, 4.16, 1.70, 1.67, 1.66, 1.65, 1.64, 1.63, 1.62, 1.55, 1.23, 1.22, 1.20, 0.84, 0.83, 0.83, 0.82, 0.81, 0.80, 0.79, 0.79, 0.78, 0.77, 0.76, 0.74, 0.74, 0.73, 0.73, 0.72, 0.72, 0.69, 0.68, 0.67, 0.66, 0.65, 0.64, 0.64, 0.63, 0.55, 0.54, 0.53, 0.52, 0.51, 0.50 ppm. Integration values are 2.00, 2.00, 1.01, 2.02, 1.01, 3.03, 3.02, 1.00.

**4fa**

<sup>13</sup>C NMR spectrum (CDCl<sub>3</sub>) of compound **4fa**. The spectrum shows peaks at the following chemical shifts (ppm): 144.12, 126.29, 118.16, 77.32, 77.00, 76.68, 66.04, 61.26, 14.43, 14.27, 4.73, and 4.04.

Chemical structure of **4ga** is shown above the spectrum.

<sup>1</sup>H NMR spectrum (CDCl<sub>3</sub>) of **4ga**. The x-axis represents the chemical shift in ppm, ranging from 10 to -1. The spectrum shows several peaks, with integration values indicated below the baseline and chemical shift values listed above the peaks.

Integration values (from left to right): 2.00, 2.02, 1.01, 2.03, 1.01, 1.01, 1.01, 3.01, 7.01, 1.03.

Chemical shift values (delta, ppm) listed above the spectrum (from left to right): 7.87, 7.86, 7.85, 7.80, 7.38, 7.37, 7.36, 7.26, 5.57, 5.51, 4.22, 4.20, 2.24, 2.23, 2.22, 2.21, 1.95, 1.92, 1.85, 1.83, 1.82, 1.81, 1.68, 1.64, 1.63, 1.61, 1.59, 1.55, 1.34, 1.33, 1.32, 1.31, 1.30, 1.28, 1.26, 1.24, 1.22, 1.21, 1.19, 1.17, 1.16, 1.15, 1.14, 1.13, 1.11, 1.10, 1.08, 1.05, 1.04, 1.02, 1.01, 0.83, 0.80.

**4ga**

Chemical structure of **4ga** is shown above the spectrum. The spectrum displays peaks corresponding to the following chemical shifts (ppm):

- 144.03
- 126.34
- 118.18
- 77.32
- 77.00
- 76.68
- 66.65
- 61.33
- 40.69
- 29.92
- 29.36
- 25.85
- 25.59
- 25.10
- 14.35

<sup>1</sup>H NMR (400 MHz, CDCl<sub>3</sub>) Spectrum of **4ma**

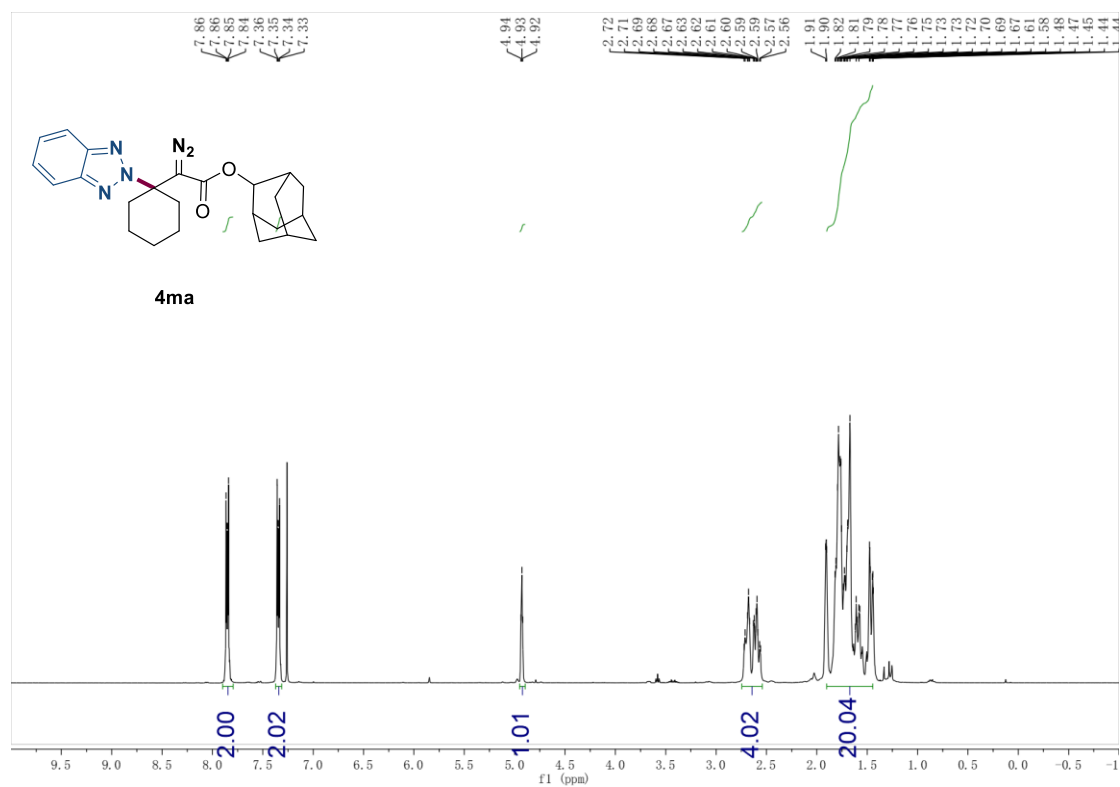

<sup>13</sup>C{<sup>1</sup>H} NMR (100 MHz, CDCl<sub>3</sub>) Spectrum of **4ma**

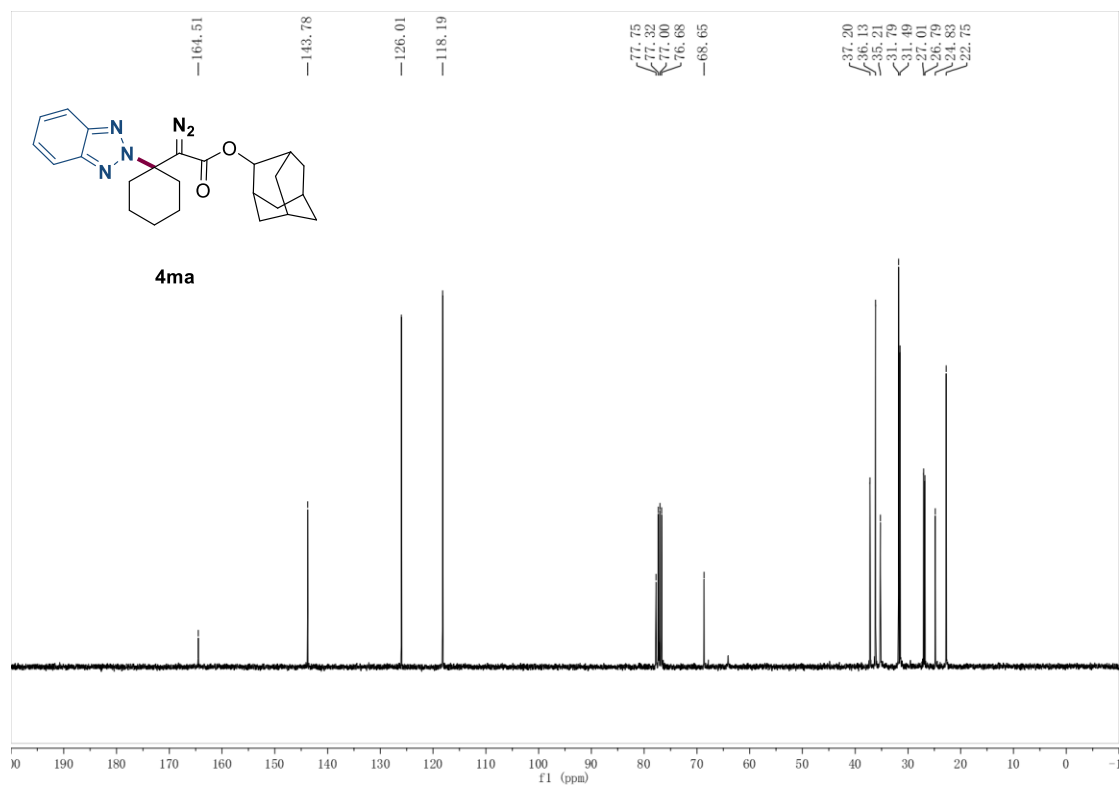

<sup>1</sup>H NMR (400 MHz, CDCl<sub>3</sub>) Spectrum of **4na**

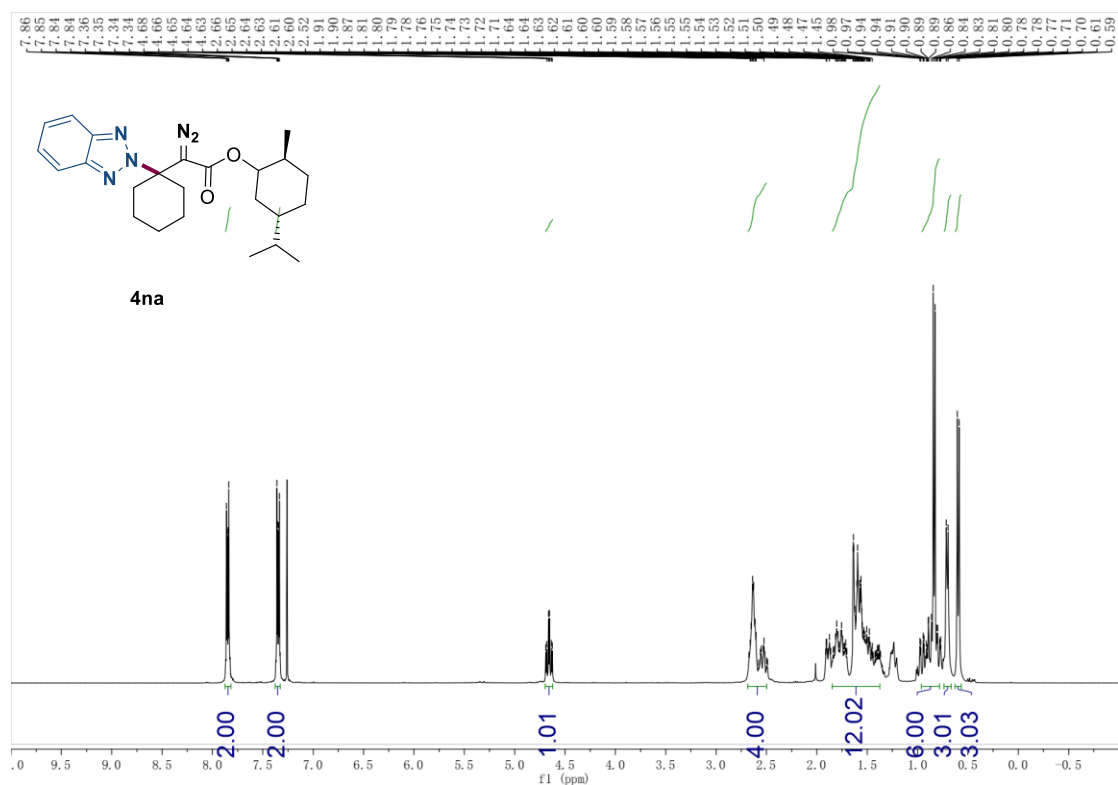

<sup>13</sup>C{<sup>1</sup>H} NMR (100 MHz, CDCl<sub>3</sub>) Spectrum of **4na**

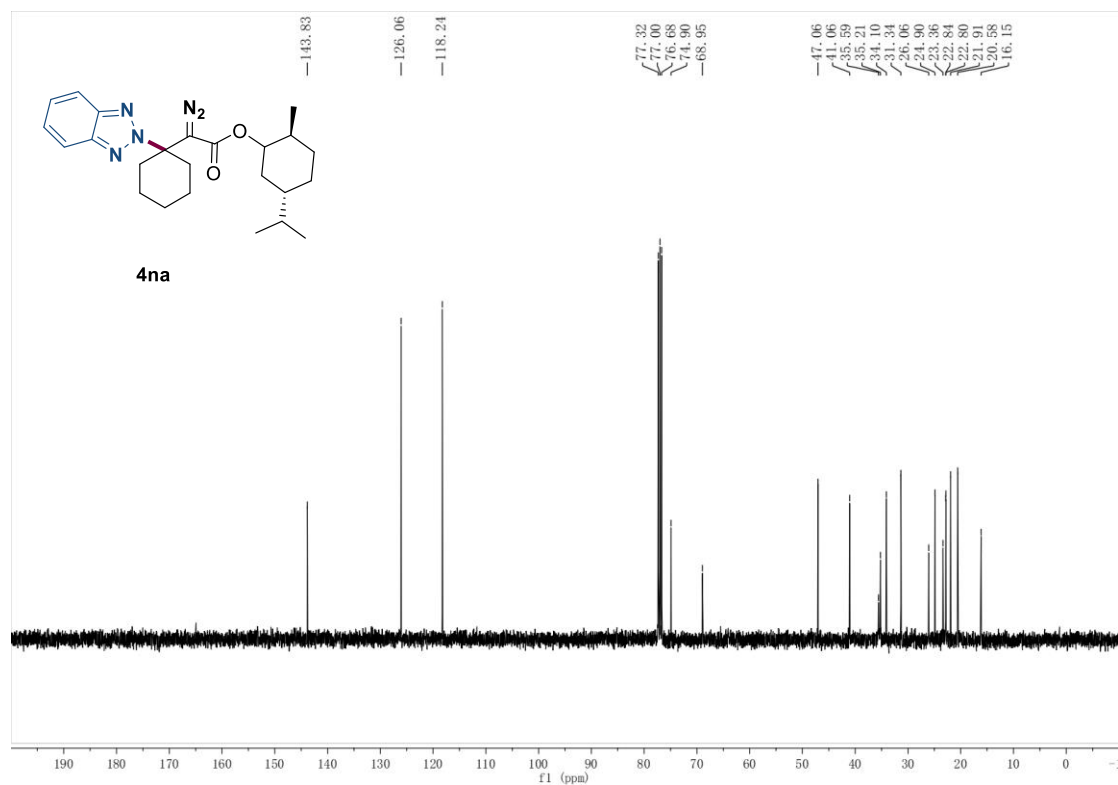



<sup>1</sup>H NMR (400 MHz, CDCl<sub>3</sub>) Spectrum of **4oa**

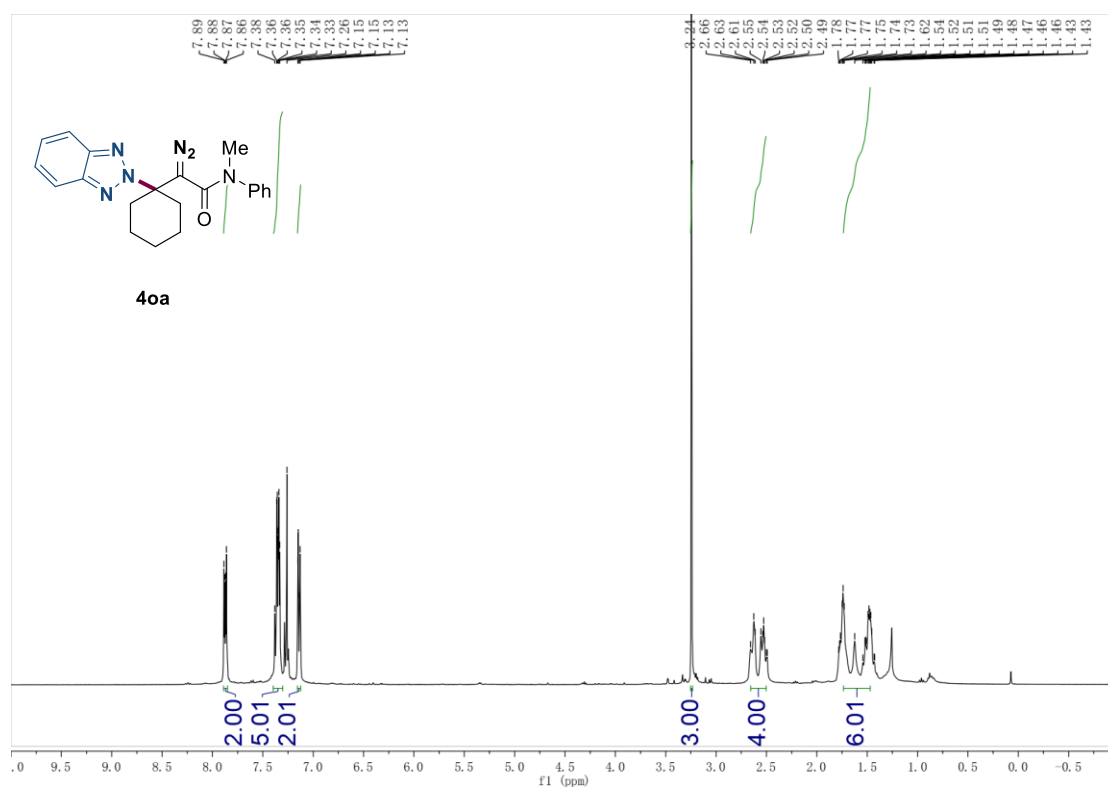

<sup>13</sup>C{<sup>1</sup>H} NMR (100 MHz, CDCl<sub>3</sub>) Spectrum of **4oa**

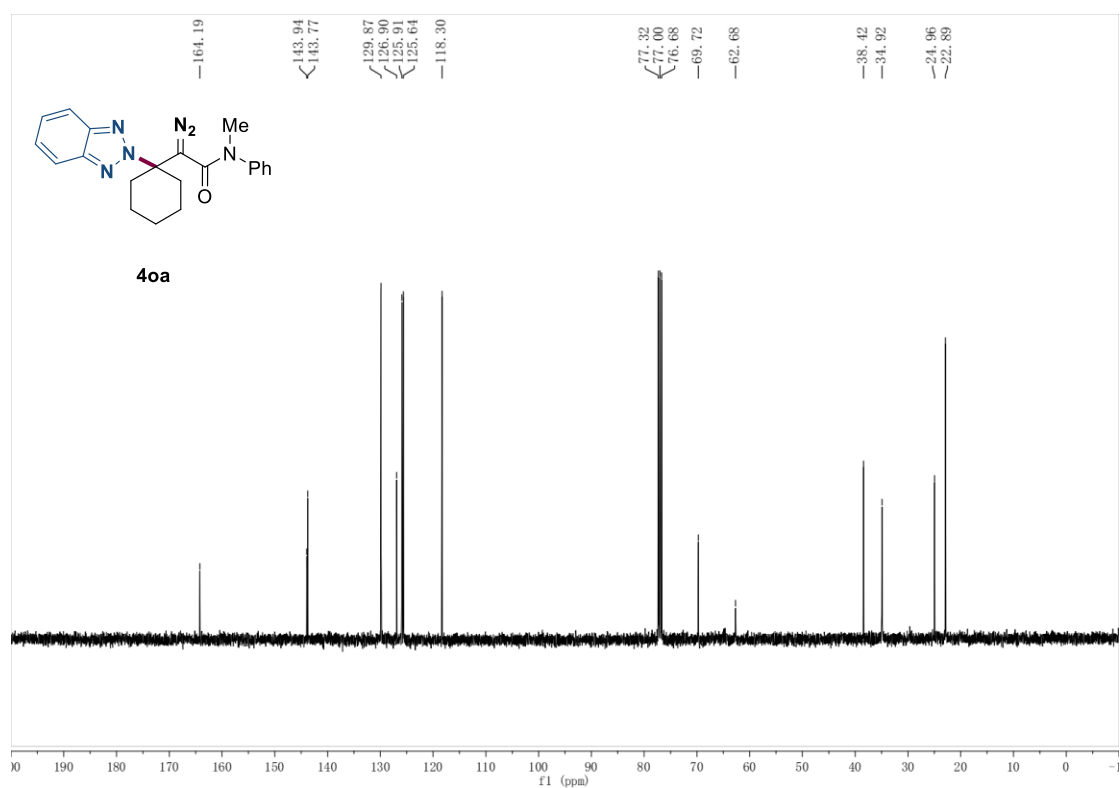

<sup>1</sup>H NMR (400 MHz, CDCl<sub>3</sub>) Spectrum of **4ab**

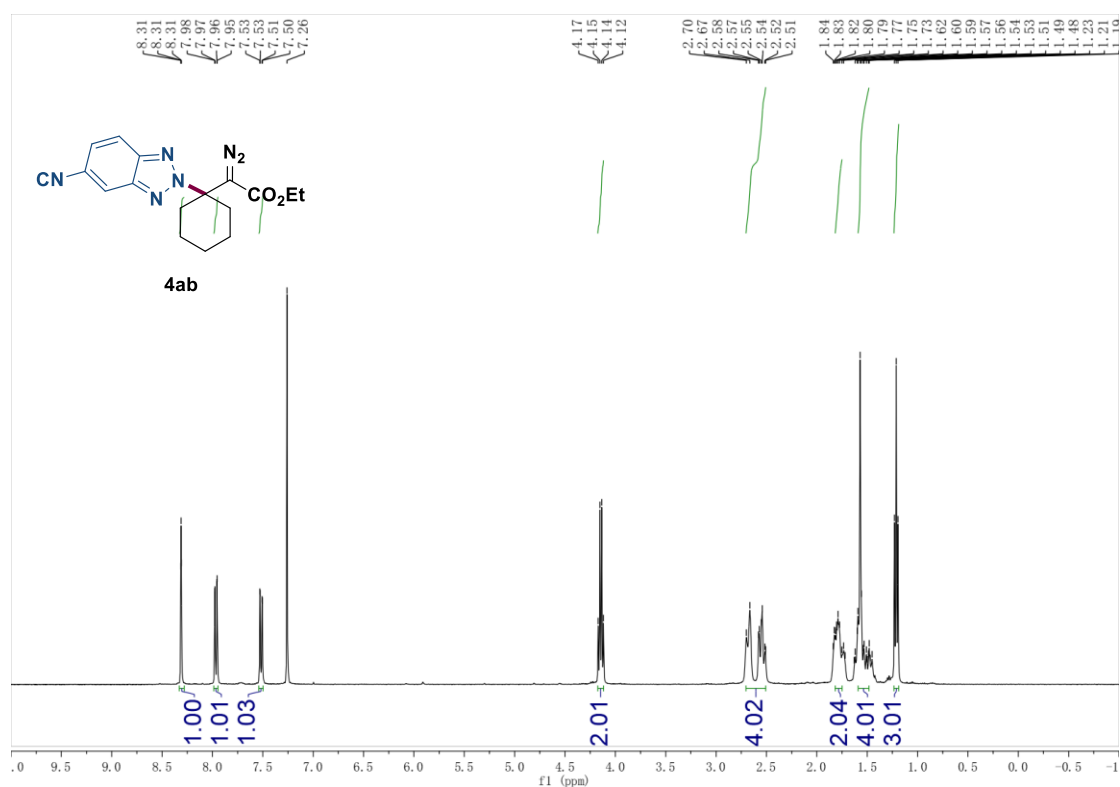

<sup>13</sup>C{<sup>1</sup>H} NMR (100 MHz, CDCl<sub>3</sub>) Spectrum of **4ab**

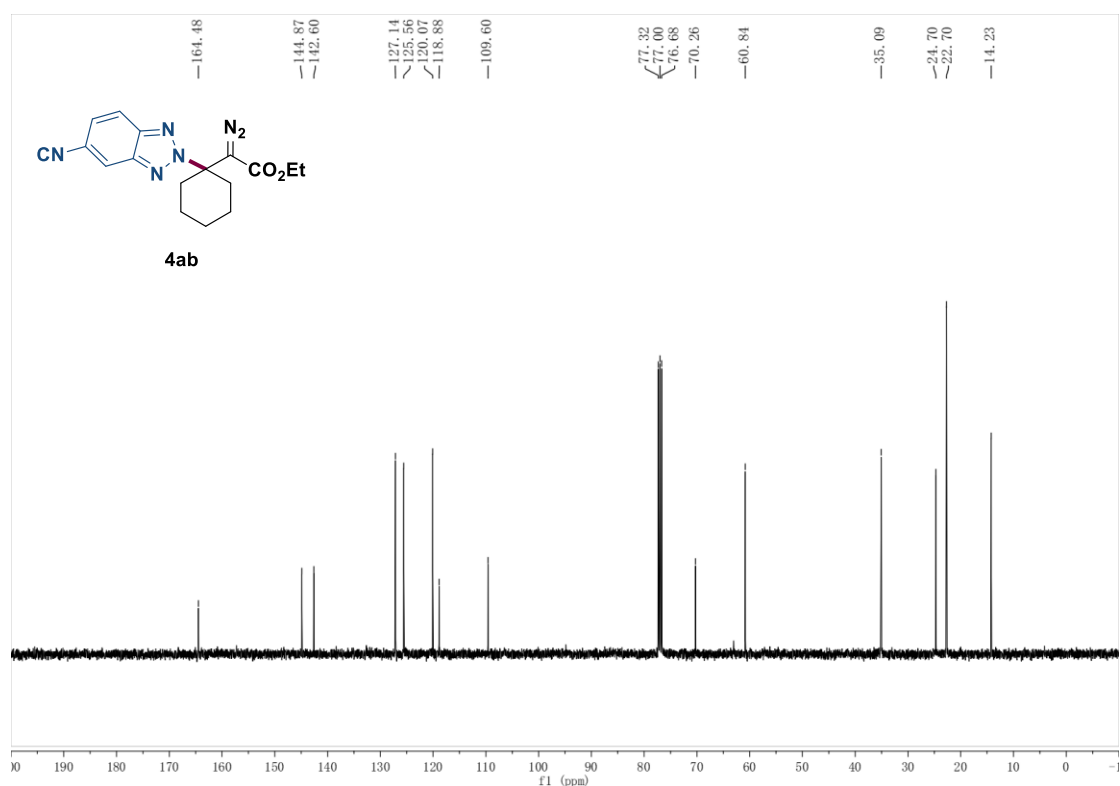

[illegible]

**4ac**

164.66  
144.16  
142.29  
131.90  
127.64  
119.51  
117.36  
77.32  
77.00  
76.68  
69.19  
60.75  
35.05  
24.78  
22.73  
14.26

f1 (ppm)

**4ad**

Cc1cc(C)c2nc(C(=O)OCC)ccc2n1

Chemical structure of 4ad: 2-ethyl 2-((4,6-dimethyl-1H-benzotriazol-2-ylidene)cyclohexylidene)carboxylate.

<sup>1</sup>H NMR spectrum (CDCl<sub>3</sub>) of compound 4ad. The spectrum shows peaks at 7.59 (s, 1H), 7.55 (s, 1H), 4.14-4.10 (m, 2H), 2.67-2.37 (m, 10H), 1.78-1.17 (m, 10H), and 1.15-1.12 (m, 3H). Integration values are 2.00, 2.02, 4.01, 6.02, 6.02, and 3.01.

**4ad**

| Chemical Shift (ppm) |
|----------------------|
| 164.74               |
| 143.21               |
| 136.41               |
| 116.70               |
| 77.32                |
| 77.00                |
| 76.68                |
| 68.05                |
| 60.56                |
| 34.97                |
| 24.80                |
| 22.81                |
| 20.76                |
| 14.23                |

$^1\text{H}$  NMR (400 MHz,  $\text{CDCl}_3$ ) Spectrum of **4ag**

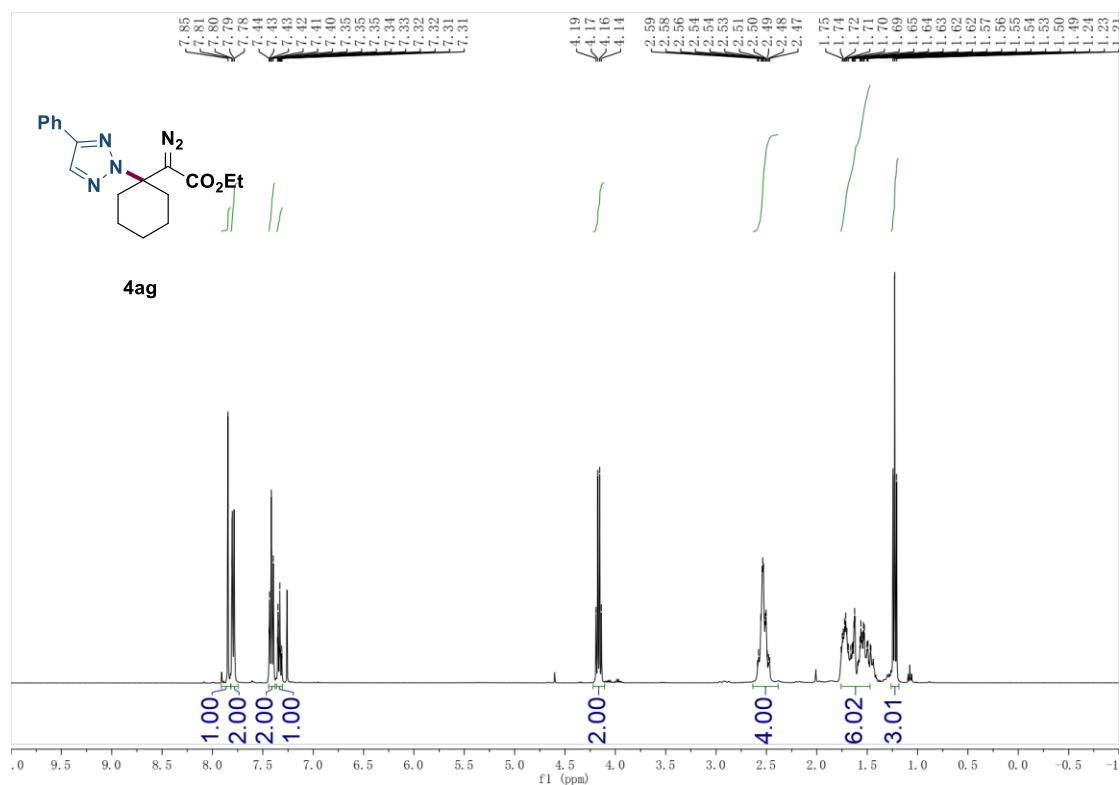

$^{13}\text{C}\{^1\text{H}\}$  NMR (100 MHz,  $\text{CDCl}_3$ ) Spectrum of **4ag**

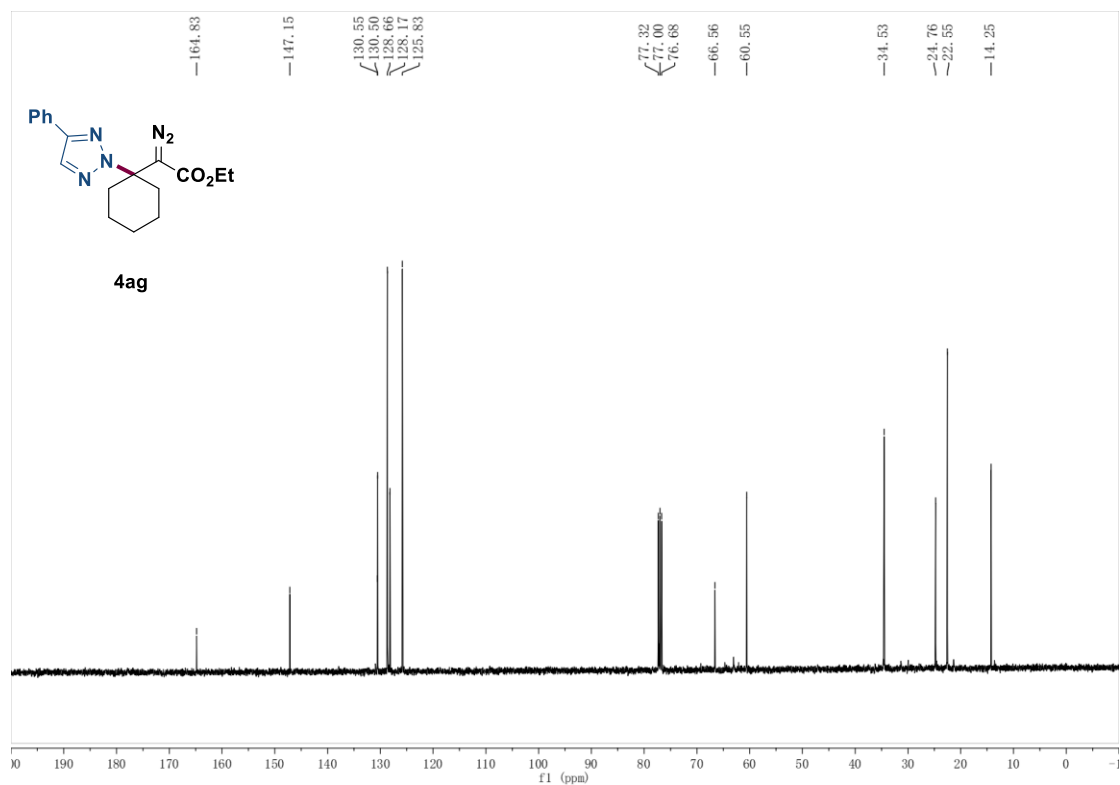

Supplement: d5cc07167d1.pdf [file d5cc07167d1.pdf]
